# DNA damage induced during mitosis undergoes DNA repair synthesis

Veronica Gomez Godinez<sup>1</sup>, Sami Kabbara<sup>2,3,1a</sup>, Adria Sherman<sup>1,3</sup>, Tao Wu<sup>3,4</sup>,  
Shirli Cohen<sup>1</sup>, Xiangduo Kong<sup>5</sup>, Jose Luis Maravillas-Montero<sup>6,1b</sup>, Zhixia Shi<sup>1</sup>,  
Daryl Preece<sup>4,3</sup>, Kyoko Yokomori<sup>5</sup>, Michael W. Berns<sup>1,2,3,4\*</sup>

<sup>1</sup>Institute of Engineering in Medicine, University of Ca-San Diego, San Diego, California, United States of America

<sup>2</sup>Department of Developmental and Cell Biology, University of Ca-Irvine, Irvine, California, United States of America

<sup>3</sup>Beckman Laser Institute, University of Ca-Irvine, Irvine, California, United States of America

<sup>4</sup>Department of Biomedical Engineering, University of Ca-Irvine, Irvine, California, United States of America

<sup>5</sup>Department of Biological Chemistry, University of Ca-Irvine, Irvine, California, United States of America

<sup>6</sup>Department of Physiology, University of Ca-Irvine, Irvine, California, United States of America

<sup>1a</sup>Current Address: Tulane Department of Ophthalmology, New Orleans, Louisiana, United States of America

<sup>1b</sup>Current Address: Universidad Nacional Autonoma de Mexico, Mexico CDMX, Mexico

\*Corresponding Author

[mwberns@uci.com](mailto:mwberns@uci.com)(M.W.B)

## 47 **Abstract**

48

49           Understanding the mitotic DNA damage response (DDR) is critical to our  
50 comprehension of cancer, premature aging and developmental disorders which  
51 are marked by DNA repair deficiencies. In this study we use a micro-focused-laser  
52 to induce DNA damage in selected mitotic chromosomes to study the subsequent  
53 repair response. Our findings demonstrate that (1) mitotic cells are capable of  
54 DNA repair as evidenced by DNA synthesis at damage sites, (2) Repair is  
55 attenuated when DNA-PKcs and ATM are simultaneously compromised, (3) Laser  
56 damage may permit the observation of previously undetected DDR proteins when  
57 damage is elicited by other methods in mitosis, and (4) Twenty five percent of  
58 mitotic DNA-damaged cells undergo a subsequent mitosis. Together these  
59 findings suggest that mitotic DDR is more complex than previously thought and  
60 may involve factors from multiple repair pathways that are better understood in  
61 interphase.

62

## 63 **Introduction**

64           DNA damage occurs naturally through various endogenous and  
65 exogenous processes. Unrepaired DNA can compromise genetic integrity leading  
66 to developmental disorders, cell death or cancer. Organisms have evolved a  
67 variety of pathways to respond to the damage. The vast majority of studies on  
68 DNA damage responses have been done during interphase of the cell cycle.  
69 However, understanding the DNA damage response (DDR) during mitosis is also

70 important since mutations accumulated during mitosis can lead to chromosomal  
71 aberrations, genomic instability of daughter cells, senescence and eventual cell  
72 death [1-4].

73         Studies examining the extent of DDR activation and repair in mitosis have  
74 primarily assessed the cellular response to double strand breaks (DSBs). DSBs  
75 may be repaired by homologous recombination (HR) and non-homologous end  
76 joining (NHEJ). HR preserves genetic fidelity as it relies on a homologous template  
77 to restore the damaged DNA. On the other hand, NHEJ leads to ligation of broken  
78 ends which can lead to loss of genetic information. Studies examining the DDR of  
79 DSBs in mitosis found truncated DDR that does not lead to the accumulation of  
80 ubiquitin ligases as well as 53BP1 and BRCA1 at mitotic damage sites [2, 5-10].  
81 Subsequent studies revealed that mitosis-specific phosphorylation of 53BP1 by  
82 polo-like kinase 1 (PLK1) block 53BP1 binding to chromatin [11, 12]. Furthermore,  
83 RAD51 and filament formation were found to be inhibited by CDK1 in mitosis [13,  
84 14]. Taken together, DSB repair, both NHEJ and HR, were thought to be inhibited  
85 in mitosis.

86         Further, DNA synthesis has been investigated in early mitosis with respect  
87 to DNA damage resulting from replication stress. However, this form of repair has  
88 been shown to be dependent on a process that is only activated in very late  
89 G2/early prophase [15-22]. Cells treated with Aphidicolin in S phase had Rad52  
90 and MUS81-EME1 dependent DNA synthesis at chromosome fragile sites during  
91 very early prophase [16, 17]. The MUS81-EME1 complex and BLM helicase are  
92 required for the restart of DNA synthesis after replication stress [18-20].

93 Interestingly, cells synchronized to prometaphase did not undergo replication  
94 stress induced DNA repair synthesis [16, 17]. Additionally, MUS81 is associated  
95 with chromosome fragile sites in prophase but at a decreased rate in metaphase  
96 [18]. This form of DNA synthesis has been termed MiDAS (Mitotic DNA repair  
97 synthesis) and should not be confused with the DNA repair synthesis described in  
98 this paper. The mechanism of replication stress induced DNA synthesis likely  
99 differs from that observed in response to damage elicited by other means and from  
100 damage induced in other phases such as prometaphase, metaphase and  
101 anaphase. Thus, the ability of mitotic cells to undergo DNA repair synthesis in  
102 response to damage elicited during mitosis remains to be elucidated.

103         The majority of DDR studies have utilized ionizing radiation or radiomimetic  
104 drugs to induce DNA damage and study the subsequent mechanisms of DNA  
105 repair. These methods of DNA damage induction result in genome-wide alterations  
106 that may lead to different DDRs. However, the laser has demonstrated to be very  
107 useful for DNA damage response studies because of its ability to target a  
108 submicron region within a specified chromosome region [23-29]. Interestingly, a  
109 laser micro-irradiation study conducted over forty years ago, showed that when the  
110 nucleolar organizer was specifically damaged in mitotic cells, a few of the irradiated  
111 cells were able to undergo a subsequent mitosis. Karyotype analysis revealed  
112 intact chromosomes with a deficiency of the nucleolar organizer [26, 30]. In today's  
113 context, these results suggest that the cells most likely repaired mitotic DNA  
114 damage through NHEJ.

115           Studies by our lab and others have shown the ability of a diffraction-limited  
116 focused near-infrared (NIR) 780nm laser micro-beam to induce DSBs marked by  
117  $\gamma$ H2AX, phosphorylated Histone H2AX on Ser 139, and KU in both interphase and  
118 mitosis [29, 31-37]. In addition to  $\gamma$ H2AX and KU at laser-damaged sites, we have  
119 demonstrated that ubiquitylation was also occurring at damage sites in mitosis [28,  
120 29]. Though our findings differ from those that utilized ionizing radiation [5, 10], the  
121 laser micro-irradiation approach permits the visualization of proteins such as KU,  
122 that do not form ionization radiation induced foci (IRIF) [38]. Therefore, it is not  
123 surprising to see accumulation of DDR proteins at laser damaged regions in  
124 mitosis that have been previously thought to be excluded from mitotic DNA  
125 damage.

126           In the current study we systematically characterize the nature of mitotic  
127 DNA damage induced by the NIR laser and perform quantitative analysis of DNA  
128 repair in mitosis and subsequent G1 phase in human and rat kangaroo (*Potorous*  
129 *tridactylus*) cells. Under our conditions, the NIR laser micro-irradiation of mitotic  
130 chromosomes induces complex damage consisting of both strand breaks (DSBs  
131 and single-strand breaks (SSBs) and ultraviolet (UV)-crosslinking damage  
132 (pyrimidine dimers) similar to what was recently described for damage to  
133 interphase cells [39]. We demonstrate that factors from various repair pathways  
134 whose function is better understood in interphase are capable of responding to  
135 mitotic DNA damage. Our results also indicate that DSBs generated on metaphase  
136 chromosomes lead to clustering of various proteins involved in NHEJ and HR. We  
137 show that DNA repair of mitotic DNA damage is ongoing and persists into G1.

## 138 **Materials and Methods**

### 139 Reagents

140 See Supplemental S3 for a list of antibodies. Other reagents are listed under  
141 corresponding methods below.

142

### 143 Cell Lines

144 Five human cell lines were utilized in this study. U-2 OS cells, referred to as U2OS  
145 in this paper, are an osteosarcoma cell line ATCC HTB 96 that was used for the  
146 majority of studies unless otherwise mentioned. CFPAC-1 ATCC CRL 1918, a line  
147 derived from cystic fibrosis pancreatic adenocarcinoma was also utilized. The  
148 isogenic cell lines, M059K ATCC 2365 and M059J ATCC 2366 were utilized to  
149 compare the mitotic DNA response when DNA-PKcs is absent (M059J). M059K  
150 contains the wild type form of DNA-PKcs making this line a good control for the  
151 DNA-PKcs mutant. Both cell lines come from a glioblastoma in the same patient.  
152 Rat kangaroo cells (PtK2) from the Potorous tridactylus were utilized due to their  
153 large chromosomes and strong adherence to the substrate that facilitate mitotic  
154 studies. These cells were grown in Advanced DMEM/F12 with 1% Glutamax and  
155 10% Fetal Bovine Serum. All Human cells were grown in Advanced DMEM  
156 supplemented with 1% Glutamax and 10% Fetal Bovine Serum. All cells were  
157 maintained in a humidified 5% CO<sub>2</sub> incubator. Cells were plated onto glass bottom  
158 gridded dishes from MatTek to a confluency of 40% and used 1-2 days post  
159 subculture. Experiments were carried out in medium containing 40ng/mL  
160 nocodazole. For inhibitory experiments the following concentrations were utilized:

161 ATM inhibitor (10 $\mu$ M KU55933), DNA PKcs inhibitor (3 $\mu$ M NU7441), and PARP  
162 inhibitor (100 $\mu$ M Nu1025).

163

164 LASER Induced DNA Damage and Microscope Image Acquisition

165 Mitotic chromosomes in live cells were irradiated using diffraction-limited (0.5 – 1  
166  $\mu$ m diameter) focal spots with a Coherent Mira 76 MHz 200 femtosecond micro-  
167 pulsed laser emitting at 780nm (Coherent Inc., Santa Clara CA). A series of beam  
168 expanders and mirrors coupled the beam into the right side port of a Zeiss Axiovert  
169 200M inverted microscope. An X-Y fast scanning mirror was positioned in the  
170 beam path prior to entry into the microscope port to facilitate moving the focused  
171 laser beam toward the desired target. The beam was focused through a 63x (1.4  
172 NA) Zeiss Plan-Apochromat oil objective. The irradiance of the laser was  
173 controlled through the use of a Glan-Thompson polarizer mounted on a motorized  
174 rotational stage. A Uniblitz mechanical shutter controlled the exposure time of the  
175 laser. A single chromosome within the cell was targeted by the laser unless  
176 otherwise noted. Chromosomes were exposed to the laser for a total of 10ms  
177 within the focal spot. This exposure resulted in  $7.6 \times 10^5$  pulses of light to a spot  
178 measuring 0.68 $\mu$ m in diameter at the selected irradiance of  $2.8\text{-}3.2 \times 10^{11} \text{W/cm}^2$ .

179 Images were collected using a Hamamatsu CCD Orca [33, 40, 41]. The  
180 polarizer, scanning mirror and shutter were controlled by software developed with  
181 LabView [42]. To determine the irradiance at the focal point, the transmission of  
182 the objective was measured using a modified dual objective method described  
183 previously [28]. The objective used in these experiments had a transmission of

184 0.50 at the laser wavelength used. Based upon the measured irradiance of 2.8-  
185  $3.2 \times 10^{11} \text{W/cm}^2$ , the damage mechanism is likely of a multiphoton nature, either 2-  
186 photon or 3-photon, or a combination of both.

187

#### 188 Immunostaining

189 Cells were fixed with 4% paraformaldehyde in phosphate buffered saline for 20  
190 minutes. Time to fixation after laser exposure varied according to the experiment.  
191 Cells were permeabilized overnight with blocking buffer containing 0.1% TritonX  
192 and 5% fetal bovine serum in phosphate buffered saline followed by staining with  
193 primary antibodies. Supplemental S3 shows a list of antibodies used. For most  
194 primary antibodies a 1:500 dilution was applied. Secondary antibodies against  
195 primaries were: Alexa-488 goat anti-mouse (Invitrogen, Carlsbad, CA), and Cy3  
196 goat anti-rabbit (Invitrogen, Carlsbad, CA) at dilutions of  $\frac{1}{2000}$ .

197

198

#### 199 DNA synthesis detection

200 To test for repair/DNA synthesis, cells were incubated with  $10 \mu\text{M}$  EdU (5-ethynyl-  
201 2'-deoxyuridine) 1-20min before laser exposure. A  $10 \text{mM}$  EdU stock was prepared  
202 according to protocol (Invitrogen catalogue #C10339). Cells that require prolonged  
203 mitosis were concurrently incubated with colcemid and EdU between 1-20 minutes  
204 prior to irradiation. Cells were fixed at time points ranging from 10-120 minutes  
205 after irradiation with 4% paraformaldehyde in PBS for 5-10minutes, and followed



206 by blocking buffer containing 10% fetal bovine serum and 0.2% Saponin in PBS  
207 for 30minutes

208

209 Terminal deoxynucleotidyl transferase (TdT) dUTP Nick-End Labeling (TUNEL)  
210 assay

211 DNA end-breaks were detected at sites damaged by the laser in mitotic  
212 chromosomes by TUNEL assay; dUTP labeling of exposed 3'-ends of DNA  
213 strands. The assay was followed according to the manufacturers protocol (Roche  
214 Applied Science).

215

216 Image Analysis

217 Tiff images were analyzed and subsequently edited to enhance the contrast  
218 and intensity using Image J software [43]. Mean pixel intensities(MPI) for laser  
219 DNA damaged regions were measured prior to contrast enhancement. The  
220 background was identified as the region outside of the DNA damage area and the  
221 mean pixel intensity of this area was subtracted from the fluorescence intensity of  
222 the lines or spots containing DNA damage in order to calculate the average pixel  
223 intensity at the damaged region. Positive signal for fluorescent markers was based  
224 on mean pixel values being higher than the level of background at undamaged  
225 chromosomes.

226

227 UV Induced DNA damage

228 U2OS cells were subjected to 254 nm light from a UVG-11 Compact UV Lamp by  
229 placing the lamp directly over 50mm cell dishes for 20 seconds. The power of the  
230 lamp was monitored with a PM100 ThorLabs Power Meter equipped with a  
231 S120UV sensor. The average power was measured before each experiment and  
232 determined to be 6mW. Prior to UV lamp exposure cells were switched into phenol  
233 red free Hanks buffered saline (Invitrogen). After UV exposure cells were either  
234 immediately fixed with 4% Paraformaldehyde or placed into a 37 C incubator prior  
235 to fixation.

236

#### 237 Pyrimidine dimer quantification

238 Mitotic U2OS were collected via mitotic shake off after synchronization with 9uM  
239 CDK1 inhibitor (Calbiochem; RO-3306). CDK1 inhibition results in arrest at G2;  
240 upon removal of inhibitor cells entered mitosis. Collected cells were exposed to  
241 265nm UV light from a UV lamp UVG-11 (Science Company) for 20s in phenol red  
242 free medium. Cells were then separated into three aliquots and lysed at 30, 60 and  
243 90 minutes after UV exposure. DNAzol Reagent (Life Technologies) was added  
244 to each sample for lysis and DNA isolation according to the manufacturer's  
245 protocol. Isolated DNA samples were quantified using a Nanodrop 2000c (Thermo  
246 Scientific) and diluted to a working concentration of 2.0ug/ml in cold PBS. DNA  
247 samples were further diluted to plate on 96-well DNA High-Binding Plates. An  
248 OxiSelect UV-Induced DNA Damage ELISA Combo Kit was utilized to determine  
249 the concentration of pyrimidine dimers in each sample well (Cell Biolabs Inc).  
250 Plates were read with a Biotek Conquer ELX800 plate reader (Biotek Inc).

251

252 Statistical Analysis

253 Prism 7 for MAC OS was utilized for all statistical analysis. A T test was performed  
254 for comparisons to controls unless otherwise noted. Values were considered  
255 significant if  $P < 0.05$ .

256

## 257 Results

258 **The laser induces complex DNA damage on mitotic chromosomes.**

259 Optimal laser parameters for the detection and consistent production of DNA  
260 damage in mitotic chromosomes were obtained by (a) varying the irradiance and  
261 comparing phase contrast image changes, and, (b) assaying for Nbs1  
262 accumulation and  $\gamma$ H2AX production. For this study we utilized irradiances of 2.8-  
263  $3.2 \times 10^{11} \text{W/cm}^2$  unless otherwise noted. These irradiances allowed us to  
264 immediately determine that chromosomes were effectively damaged due to rapid  
265 phase contrast changes in the irradiated chromosome regions (Fig 1A arrows at 4  
266 and 6s). Dark material, which may reflect phase separation is visible at 16s post  
267 laser exposure. In a different example, of a cell fixed ~5s after the laser, we see  
268 that  $\gamma$ H2AX surrounds an area targeted by the laser (Fig 1B). In a previous study  
269 we showed that dark material is a result of the accumulation of DDR and that  
270  $\gamma$ H2AX may surround the DDR and or overlap with them [34]. Additionally, at these  
271 irradiances  $\gamma$ H2AX and Nbs1 were detected nearly 100% of the time (48 of 48  
272 cells) and (16 of 17 cells) respectively.

273

274 **Fig 1. Characterization of Laser induced DNA damage.** (A) At the selected  
275 irradiance of  $3.0 \times 10^{11} \text{ W/cm}^2$  phase contrast changes are observed at a laser  
276 damage site on prometaphase chromosomes in nocodazole synchronized U2OS  
277 cells (4 and 6s). At 16s post laser (see arrows) phase dark material is apparent.  
278 Scale bar= $1 \mu\text{m}$ . (B) A metaphase cell that was fixed  $\sim 5\text{s}$  after the laser and stained  
279 for  $\gamma\text{H2AX}$  (arrows and inset). This cell was fixed prior to dark material  
280 accumulation. Paling is observed in the inset.  $\gamma\text{H2AX}$  is formed around the region  
281 damaged by the laser. (C) Positive TUNEL is seen at laser damaged regions  
282 (arrows) in prometaphase cells incubated with nocodazole. Two different  
283 chromosomes were damaged at different time points within the same cell. The first  
284 damage was induced 30 minutes prior to fixation and the second damage was  
285 induced 20 minutes after the first damage and fixed after 10 minutes. The TUNEL  
286 signal at the second damage site was brighter than the signal at the first damage.  
287 A graph of TUNEL signal on the right is the average of six cells per category. Scale  
288 bar= $1 \mu\text{m}$ . (D) XRCC1 and NBS1 co-localize to chromosome damage in a cell fixed  
289 25 minutes post laser.

290

291 The type of DNA damage induced by the laser on mitotic cells was  
292 assessed by immuno-staining for (1) DNA damage response proteins, (2)  
293 damaged bases, and (3) the TUNEL assay. Experiments were carried out in  
294 human U2OS cells unless otherwise mentioned. Positive TUNEL at laser induced  
295 DNA damage sites demonstrated the presence of END breaks Fig 1C, (magenta).

296 TUNEL signal was higher in chromosomes fixed 10 minutes post laser when  
297 compared to those fixed 30 minutes post laser. These results indicate that factors  
298 may have bound broken ends.

299 Several DDR proteins were found at damaged chromosomes which provide  
300 information on the type of damage created by the laser. KU heterodimer confirmed  
301 the presence of double strand breaks (DSBs) (Figs 2D, 4A and B, and S1).  
302 Pyrimidine dimers (CPD) as a result of the laser exposure were also detected and  
303 will be discussed further in this paper. XRCC1, which is involved in single strand  
304 break (SSB) repair, nucleotide excision repair (NER) and base excision repair  
305 (BER) localized to laser-damaged DNA (Fig 1D)[44]. However, we failed to detect  
306 significant base damage at laser targeted regions at the irradiance range of 2.8-  
307  $3.2 \times 10^{11}$  W/cm<sup>2</sup> using an antibody specific for 8-Oxoguanine (8-oxoG) (Trevigen)  
308 (S1 A). Nevertheless, a key component of BER, APE-1 was detected at laser  
309 damage sites (S1 C).

310

311 **Fig 2. Mitotic laser induced DNA damage leads to the recruitment of various**  
312 **DDR proteins including some not previously observed on mitotic DNA**  
313 **damage.** (A-C) The MRN complex (MRE-11, Rad50, Nbs1) forms at laser  
314 damaged chromosomes. Nocodazole synchronized U2OS cells are shown. MRE-  
315 11(n=4), Rad50(n=3), NBS1(n=16). (C-E) Ub(n=19), KU(n=23), MDC1(n=7),  
316 53BP1(n=6) and BRCA1(n=10) were also observed at chromosomes damaged by  
317 the laser. Scale bar=10µ m. (E and F) BRCA1 immunostaining using two different  
318 antibodies. (E) BRCA1 ab16780 antibody from Abcam. (F) BRCA1 OP107

319 antibody from Calbiochem. (F-G) show the localization of BRCA1 and 53bp1 with  
320 respect to  $\gamma$ H2AX.

321

### 322 **Mitotic cells undergo DNA Repair synthesis.**

323         Since DNA repair generally has been perceived to be inhibited in mitosis,  
324 we directly monitored the repair event in mitotic cells by the incorporation of the  
325 thymidine analogue 5-ethynyl-2'-deoxyuridine (EdU). For these experiments, cells  
326 were incubated either 10 minutes prior to laser or 10 minutes post laser. For both  
327 conditions cells were fixed 30 minutes post laser (Fig 3A). Cells damaged in  
328 metaphase were capable of incorporating the analogues, and this incorporation  
329 was surrounded by  $\gamma$ H2AX known to spread to the neighboring chromatin (Fig  
330 3B)[45, 46]. Cells incubated with EdU prior to the laser showed significant repair  
331 during the first 10 minutes post laser (Fig 3C). We found that DNA repair synthesis  
332 is not restricted to the initial 10 minutes post laser as cells incubated with EdU post  
333 laser were still positive for EdU albeit weaker, demonstrating ongoing DNA  
334 synthesis. The incorporation of the EdU (i.e. repair) was observed in multiple cell  
335 lines during mitosis: U2OS (Fig 3B and C), and the Isogenic cell lines M059K &  
336 M059J (Fig 3D top panel; 3D bottom panel, respectively).

337

338 **Fig 3. Mitotic cells undergo DNA synthesis repair.** (A) Schematic of EdU  
339 incubation for experimental results shown in (B-D). In the first scenario EdU was  
340 added to cells 10 minutes prior to the laser to allow penetration into cells before  
341 damage. In the second scenario EdU was added to cells 10 minutes post laser to

342 test whether repair is ongoing. All cells were fixed 30 minutes post laser. (B)  
343 Immunofluorescence images of nocodazole synchronized U2OS (Osteosarcoma)  
344 cells damaged under the conditions depicted in the schematic above were stained  
345 for EdU and  $\gamma$ H2AX.  $\gamma$ H2AX partially overlaps and surrounds EdU. Scale bar=  
346 10 $\mu$ m (C) Quantifications of EdU intensity at the damage site in cells incubated pre  
347 or post laser. (D) Isogenic Glioblastoma cells M059K(top panel) and M059J(bottom  
348 panel) were stained for EdU and  $\gamma$ H2AX.

349

350 **Complete assembly of Non-homologous End Joining factors in response to**  
351 **mitotic DNA damage.**

352 In an effort to identify what components of the DNA damage response may  
353 be active following laser damage to mitotic chromosomes, several damage  
354 sensors, adaptor proteins and transducers were tested for their ability to cluster to  
355 laser damage sites. Our evaluation begins with DSB repair pathway proteins.  
356 DSBs are amongst the most deleterious in that they can result in chromosomal  
357 translocations if left unrepaired [47].

358 During interphase the Mre11-Rad50-Nbs1 (MRN) complex is one of the first  
359 factors to recognize DSBs [48, 49]. At the selected irradiance all three components  
360 of the MRN complex are detected at laser-induced damage sites in mitotic cells  
361 (Fig 2A-C). Although, BRCA1, 53BP1 and Ubiquitin (Ub) responses have been  
362 observed to be attenuated in mitosis, [50, 51] we previously showed an Ub signal  
363 at NIR laser-induced damage sites in PtK1 cells [28]. In the present study, Ub  
364 accumulation was also observed in mitotic U2OS cells (Fig 2C). Ub response at

365 damage sites is critical for localization of BRCA1 and 53BP1 at DSBs in interphase  
366 nuclei [52, 53]. Correlating with the presence of the Ub signal at mitotic damage  
367 sites, we observed the accumulation of BRCA1 and 53BP1 at mitotic damage sites  
368 (Fig 2E-G). Our results indicate that Ub, BRCA1 and 53BP1 can be recruited to  
369 highly clustered laser-induced damage sites on mitotic chromosomes.

370 DSBs may also be repaired by non-homologous end joining (NHEJ) which  
371 is an error-prone DSB repair pathway that leads to ligation of broken ends. NHEJ  
372 initiation has been observed in mitotic DNA lesions using a NIR laser in two  
373 separate studies [28, 38]. In our studies KU accumulated during the first 5-15 min  
374 post laser (Fig 4A & B). In contrast, the recruitment of DNA ligase IV that mediates  
375 end joining at a later step of NHEJ was not apparent until 20 minutes post  
376 irradiation (Fig 4A and B). DNA PKcs and XRCC4, the binding partner of ligase IV,  
377 was also detected at laser damage (Fig 4C and D). Therefore complete assembly  
378 of NHEJ factors may occur in mitosis.

379

380 **Fig 4. NHEJ factors cluster at Mitotic DNA damage.** (A) KU and LIGASE signal  
381 intensity quantified in U2OS at various times post laser. Cells were maintained in  
382 nocodazole throughout experiments. N=7 for cells fixed 5-15 and 20-25 minutes  
383 post laser, N=9 for cells fixed 50-55 minutes post laser (B) Cells stained for KU  
384 and LIGASE IV. An arrow depicts the area targeted by the laser and a region that  
385 is magnified as an inset. Scale bar=10  $\mu$ m. (C) DNA-Pkcs clusters to damaged  
386 U2OS chromosomes. An inset depicts a magnified view of DNA-PKcs at the cut  
387 site. (D) XRCC4 and  $\gamma$ H2AX at laser damaged region.



388

389           Classic NHEJ is dependent on DNA-PKcs. We investigated the contribution  
390 of NHEJ on DNA synthesis repair by utilizing DNA-PKcs deficient (M059J) and  
391 isogenic DNA-PKcs-positive (M059K) cell lines. Immunostaining of DNA-Pkcs in  
392 the isogenic lines confirmed its presence in M059K and absence in M059J (S2 A).  
393 Nevertheless, DNA repair synthesis was observed in both cell lines (Fig 2D and  
394 5B). Similarly, U2OS cells treated with 3  $\mu$ M DNA-PKcs inhibitor NU 7441 showed  
395 no significant difference when compared to control cells (Fig 5A DMSO vs DNA-  
396 PKcs inhibitor).

397

398 **Fig 5. Mitotic DNA synthesis on DNA damaged chromosomes of cells with**  
399 **compromised ATM, DNA PKcs or PARP activity.** (A) Nocodazole synchronized  
400 U2OS cells treated with inhibitors for PARP (100 $\mu$ M NU1025), ATM (10 $\mu$ M  
401 Ku55933) and DNA PKcs (3 $\mu$ M NU7741) were assessed for DNA synthesis. Each  
402 experiment was normalized to the mean of the corresponding DMSO control. (B)  
403 Synchronized PtK2 cells treated with DMSO, ATM inhibitor, and combined DNA-  
404 PKcs and ATM. (C) Nocodazole synchronized human isogenic cell lines M059K  
405 and M059J (DNA-PKcs deficient) were treated with ATM inhibitor. The percent of  
406 positive cells is plotted. Above each bar is the number of cells per category. (D)  
407 CtIP and (E) RPA were found on laser-damaged chromosome regions on U2OS  
408 cells fixed 15(top panel) and 30(bottom panel) minutes post laser.

409

410           Alternative-NHEJ (alt-NHEJ) may also repair DSBs when DNA-PKcs is  
411   compromised [54]. Poly (ADP-ribose) polymerase 1 (PARP1) has been shown to  
412   play a pivotal role in alt-NHEJ [55, 56]. Therefore we inhibited PARP in U2OS cells  
413   with 100 $\mu$ M NU 1025 and tested for effective inhibition by immunostaining for  
414   poly(ADP-ribose) (S2 B). S2 D depicts an untreated U2OS mitotic cell positive  
415   with PARP staining at the damage site. Interestingly EdU results from cells  
416   synchronized with nocodazole suggest that PARP inhibition may lead to greater  
417   DNA synthesis (Fig 5A, DMSO vs PARPi). Since PARP inhibition is known to  
418   stimulate c-NHEJ, the effect of PARPi on EdU incorporation was examined in  
419   DNA-PKcs deficient cells [39, 57, 58]. PARP inhibition did not abolish DNA  
420   synthesis at mitotic DNA damage sites (S2 C). These results reveal that PARP  
421   signaling plays a role in suppression of DNA repair during mitosis.

422

423   **Homologous Recombination is activated in mitosis and may lead to initiation**  
424   **of RAD51 filament formation in the absence of functional DNA-PKcs or**  
425   **CDK1.**

426           Homologous recombination may preserve genomic integrity during the  
427   repair of DSBs. This process relies on resection of the damaged DNA ends and a  
428   homologous template to synthesize new DNA and preserve genomic integrity.  
429   ATM kinase is key to the activation of this repair pathway [59, 60]. ATM inhibition  
430   by 10 $\mu$ m KU 55933 in M059J cells significantly attenuated DNA synthesis at mitotic  
431   damage sites (Fig 5B M059J:ATMi). Similar results were obtained in mitotic Ptk2  
432   cells treated with both DNA-Pkcs and ATM inhibitors (Fig 5C). Since ATM was

433 shown to stimulate HR repair in interphase [59, 60], these results raise the  
434 possibility that when both c-and alt-NHEJ pathways are inhibited, HR factors may  
435 contribute to DNA repair during mitosis.

436 A key first step towards HR repair involves DNA end resection through CtIP  
437 followed by RPA binding to the resected DNA ends [61]. Consistent with previous  
438 studies that used meiotic *Xenopus* extract to monitor DSB repair, we observed  
439 CtIP and RPA at mitotic laser damage sites suggesting ongoing end resection (Fig  
440 5 D and E) [62].

441 Downstream of end resection and RPA binding is RAD51 filament formation  
442 for homologous strand invasion. Previously, RAD51 was reported to not  
443 accumulate to damaged meiotic chromatin from *X. laevis* egg extract unless CDK1  
444 was inhibited [62]. Similarly, we did not observe RAD51 filament formation in U2OS  
445 mitotic cells synchronized with nocodazole (Fig 6A and C). In contrast, RAD51  
446 accumulation was observed at the laser damage sites in interphase cells fixed at  
447 25 minutes post laser damage. Similar results were obtained with a different  
448 human cell line, CFPAC-1, indicating that this is not a cell type-specific  
449 phenomenon (S2 E and F).

450

451 **Fig 6. DNA damaged chromosome regions are devoid of RAD51.** (A) Percent  
452 of U2OS cells positive for RAD51 according to mitotic phase. CDK1 inhibition  
453 causes some cells to present mean pixel values above background,  $MPI=48 \pm 41$  in  
454 six out of eleven cells. (B) DNA Pkcs deficient cells, (M059J) also show a greater  
455 likelihood of RAD51 above background levels when compared to U2OS. Nine out

456 of twelve had positive RAD51, MPI=115 ± 69. (C) U2OS mitotic cells stained for  
457  $\gamma$ H2AX and RAD51. (D) U2OS treated with CDK1 inhibitor underwent premature  
458 cytokinesis and chromosome de-condensation. Nevertheless, RAD51 co-localized  
459 with  $\gamma$ H2AX and appears dotted along a track in an enlarged image of a boxed  
460 region shown on the RAD51 column. (E) The isogenic glioblastoma lines M059K  
461 and (F) M059J were DNA damaged with the laser and stained for  $\gamma$ H2AX and  
462 RAD51. (F) M059J cells (deficient in DNA-PKcs) show RAD51 at the damage spot.  
463 Scale bar=10 $\mu$  m

464

465 CDK1 was shown to play a role in HR inhibition in mitosis [9, 11, 62, 63].  
466 Cells treated with 10 $\mu$ M CDK1 inhibitor R0-3306 underwent premature cytokinesis  
467 and or chromosome de-condensation within 5 to 10 minutes of inhibitor addition  
468 (Fig 6D). A proportion of CDK1 inhibited mitotic U2OS cells demonstrated slightly  
469 higher fluorescence pixel values above background (48 ± 41) than control cells  
470 whose values were negative (Fig 6A and D). RAD51 appears filamentous at  
471 damage sites showing positive RAD51 staining (Fig 6D, arrows on magnified  
472 view). However, the levels of fluorescence intensity were not in the same positive  
473 range of RAD51 (1409 ± 660 mean pixel intensity) seen in interphase cells. Thus,  
474 it would appear that other pathways independent of CDK1 activity may regulate  
475 RAD51 suppression.

476 Interestingly, in the absence of DNA-PKcs, most cells (9 of 12) showed  
477 some RAD51 at damage sites (MPI=115 ± 69) with a large standard deviation and  
478 a range of 76 to 1288 MPI (MPI=680). These results suggest that mitotic DNA-

479 PKcs also regulates RAD51 accumulation at clustered damage sites (Fig 6B and  
480 F). Interestingly the staining pattern of RAD51 differs from that observed in CDK1  
481 inhibited U2OS cells (compare magnified view i.e. 10x of Fig 6D and F). M059K  
482 cells did not show RAD51 that localized to the damage area (Fig 6E).

483 Taken together, in contrast to NHEJ factor assembly, only the early part of  
484 the HR pathway proteins accumulate to damaged DNA on mitotic chromosomes.  
485 CtiP and RPA both increase over time suggesting the formation of more strand  
486 breaks or end resection. RAD51 binding may be stimulated in mitosis when DNA-  
487 PKcs or CDK1 are compromised. Nevertheless, Rad21 was not observed at  
488 damaged regions (S2 G). This is possibly due to the fact that cohesin is  
489 destabilized during mitosis which only promotes HR between sister chromatids but  
490 not other types of HR[64, 65]

#### 491 **Mitotic DNA repair synthesis is not a laser specific phenomenon.**

492 Our EdU labeling results strongly indicate that there is repair of laser-  
493 induced damage in mitosis. To confirm that mitotic DNA synthesis repair can occur  
494 in cells damaged by other means we exposed cells to UV light from a lamp and  
495 then isolated by FACS using an antibody specific for phosphorylated histone H3  
496 Serine 10 (phospho-H3S10) (Fig 7A red). Phospho-H3S10 is greatest during  
497 mitosis and therefore the mitotic population can be easily separated from the  
498 interphase population. Mitotic cells were plotted against EdU fluorescence  
499 intensity (Fig 7A, bottom panels). The scatter plots reveal that 50 percent of cells  
500 stained positive for EdU in response to UV when compared to 30 percent of control  
501 cells. A histogram of the same results in Fig 7B depict the increase in proportion

502 of cells staining positive for EdU has increased (red histogram compared to blue).  
503 The results indicate that UV damage repair can occur in mitotic cells and mitotic  
504 repair is not a laser damage specific phenomenon. Amongst our findings are  
505 results showing that mitotic cells are capable of removing pyrimidine dimers (CPD)  
506 as confirmed through ELISA of UV damaged cells (Fig 7C). Similarly, cells  
507 damaged by the laser demonstrated a decrease of pyrimidine dimers (Fig 7D).  
508 PtK2 and U2OS cells stained for CPD are shown in Fig 7E and F, respectively.

509

510 **Fig 7. UV induced DNA damage repair in mitosis.** (A) FACS of U2OS cells  
511 stained for mitotic marker, phospho-H3S10 (y-axis) plotted against side scatter (x-  
512 axis) on the top two panels. Cells that stained positive for phospho-H3S10 were  
513 plotted against EdU (x-axis) in the bottom panels. The right quadrant of each plot  
514 shows mitotic cells that stained positive for EdU. A greater proportion of cells are  
515 positive for EdU following UV exposure. Compare 30% without UV to 50% with  
516 UV. (B) A histogram of both populations, of cells, damaged/UV exposed in red and  
517 undamaged in blue to show the way the populations shift towards greater EdU  
518 signal after UV exposure. (C) ELISA of a population of non-laser UV exposed  
519 synchronized mitotic and interphase cells collected at 30, 60, and 90 minutes post  
520 exposure. N=3 replicates for mitotic populations and N=2 for interphase cells. (D)  
521 Quantification of CPD intensity in U2OS mitotic cells compared at 10 minutes and  
522 3hours post laser, N=5 per category. (E) A mitotic PtK2 whose chromosome was  
523 damaged by the laser(arrow). A post fixation phase image of the cell shows a dark  
524 spot at the laser cut site. Cyclo-butane pyrimidine dimers (red) are seen at the

525 exposure site. (F) A U2OS chromosome positive for cyclo-butane pyrimidine  
526 dimers (green) at the damaged site.

527

528 **Mitotic DNA damage is carried into interphase.**

529 The ability of clustered mitotic DNA damage to accumulate RAD51 post  
530 mitosis was investigated. RAD51 was not detectable in our studies unless CDK1  
531 and or DNA-PKcs activity was compromised. Therefore, cells were examined for  
532 the ability of HR factors to recruit to laser damage created in mitosis once the cells  
533 had entered G1. We found that in the following G1 phase, RAD51 does  
534 accumulate to the DNA damage produced in the preceding mitosis (Fig 8A and B).  
535 EdU colocalized with RAD51 indicating the possibility that HR may be responsible  
536 for some of the incorporation and that repair is ongoing (Fig 8B and 8D). A cell  
537 damaged in metaphase and fixed 40 hours post mitosis is still undergoing DNA  
538 repair synthesis(Fig 8D).

539

540 **Fig 8. Mitotic DNA damage carried into G1 suggests ongoing repair.** Cells  
541 damaged in mitosis where fixed 2 hours post division and stained for downstream  
542 HR and NHEJ factors as well as for EdU. (A) RAD51 and  $\gamma$  H2AX localize to the  
543 same area of a G1 cell. (B) EdU and RAD51 co-localize with each other and a  
544 phase dark spot of a G1 cell. (C) XRCC4 and  $\gamma$  H2AX slightly overlap in a G1 cell.  
545 Insets depict a magnified view of damage spots pointed out in arrows. (D) Forty  
546 hours post mitosis a cell has a phase dark spot that is surrounded by  $\gamma$  H2AX and  
547 that co-localizes with EdU. Scale bar= 10 $\mu$ m.

548           Additionally, we assessed whether NHEJ factors are still present in G1 from  
549 damage created in mitosis. Immuno-staining for XRCC4 showed that, in fact,  
550 XRCC4 is still present at G1 (Fig 8C). Thus, it seems that the cell may be trying to  
551 repair clustered laser damage utilizing factors from NHEJ and HR. Previously we  
552 reported that BRCA1 and 53BP1 were also observed post mitosis[28]. This result  
553 further supports repair is ongoing.

554           We investigated the ability of cells damaged in metaphase, anaphase and  
555 G1 to complete mitosis and enter a subsequent mitosis. For this, undamaged  
556 U2OS cells followed under our culture conditions showed an average division time  
557 of  $37 \pm 5$  hours post cytokinesis. Values were calculated by taking the time of  
558 cytokinesis and following a cell until its entry into the subsequent mitosis (S3 A  
559 controls, N=11 cells). As a result, damaged cells were followed for a minimum of  
560 40 hrs.

561           The majority of mitotic cells damaged with the laser entered G1, 26 of 28 of  
562 cells damaged in metaphase and 8 of 10 cells damaged in anaphase (Fig 9A and  
563 B). One cell damaged in metaphase died. The daughters of cells that divided were  
564 followed and entry into mitosis i.e. completion of a cell cycle was assessed within  
565 an observation window up to 40-47 hours post DNA damage. A proportion (21%)  
566 of daughter cells with damage inflicted in pro-metaphase underwent a subsequent  
567 mitosis, compared to 37% for daughter cells carrying damage elicited in anaphase.  
568 Examples of time-lapse analysis of cells damaged in metaphase and anaphase  
569 are shown in which both daughter cells underwent subsequent mitosis (Fig 10A  
570 and C). Cells that did not divide and reverted are shown in Fig 10B and D. Daughter



571 cells carrying the damaged chromatin took longer to divide than their counterparts  
572 without damaged chromatin (S3 B).

573

574 **Fig 9. Fate of Cells Damaged in Mitosis and G1.** (A) Twenty-eight metaphase  
575 cells were DNA damaged by the laser. A red point depicts laser damage. Twenty  
576 six out of the twenty-eight divided. One underwent furrow regression. Another  
577 underwent cleavage formation followed by cell death. The fates of daughters sets  
578 are shown below. A green nucleus marks S-phase. Divides is abbreviated as div.  
579 Six different outcomes are summarized: 1) both daughters die, 2) both daughters  
580 are senescent, 3) one daughter is in S and another is senescent, 4) both daughters  
581 are senescent, 5) one daughter divided and another is senescent, and 6) both  
582 daughters divide. (B) Ten cells were DNA damaged during Anaphase. Eight cells  
583 progressed into G1. Of the two that did not progress into G1, one underwent furrow  
584 regression, and another appears to have fused at a later point. Five outcomes for  
585 the daughters are summarized: 1) one set had both daughters in senescence, 2)  
586 three sets had one in S and the other in senescence, 3) one had one daughter  
587 divide and another in S phase, 4) another had one daughter divide and the other  
588 was senescent and 5) two sets had both daughters divide. (C) Nine G1 sisters  
589 were identified. One sister from each set was damaged. The cell containing the  
590 damaged nucleus has a red point. All of the undamaged sisters divided. Five of  
591 the damaged sisters divided.

592

593 **Fig 10. Time-lapse of cells damaged in mitosis.** (A) Montage of a cell DNA  
594 damaged in metaphase whose daughters underwent mitosis at 36 and 40 hrs post  
595 division. Laser damage was created through a 63x objective. Therefore, cells  
596 appear larger on the first image. Subsequent images were taken with a 20x  
597 objective to broaden the field of view. (B) A metaphase DNA damaged cell whose  
598 furrow regressed at 1hr. (C) Montage of a cell damaged in Anaphase whose  
599 daughters divide at 36:30 and 40:30 hours. (D) An anaphase cell that appears to  
600 have divided, see 00:50 and 13:20. However, at 13:40 and 15:00 the cell begins  
601 to show furrow regression. Scale bar =10 $\mu$ m.

602

603 Damaged G1 cells were also followed to compare their ability to repair with  
604 that of mitotic cells. These cells were identified by following anaphase cells until  
605 completion of division and formation of two daughter cells. Of both daughter cells  
606 only one sister was damaged with the laser. However, both sisters were followed.  
607 Prior to fixation, all cells were incubated with EdU to check for S-phase status of  
608 cells that had not divided within the observation window. Fig 9 contains a summary  
609 of cell fates.

610 As expected all undamaged G1 sisters entered mitosis within the  
611 observation window. Out of the nine damaged cells, five divided i.e. 55% divided.  
612 Our results suggest that damage in metaphase is more deleterious than damage  
613 induced in anaphase or G1 (Fig 9C). Notwithstanding, these results demonstrate  
614 that a percentage (25%) of cells laser damaged in mitosis (metaphase and/or

615 anaphase) are capable of undergoing a subsequent mitosis.

616

## 617 **Discussion**

618 We present data demonstrating that strand breaks by the 780 nm NIR  
619 laser induce a DDR in mitotic cells and that various DNA repair proteins are  
620 recruited that are known to function in DSB repair during Interphase Fig 11.  
621 Additionally, we demonstrate that mitotic cells are capable of ongoing DNA repair  
622 synthesis when damage is elicited by an external source, laser or UV light.  
623 Furthermore, our results show that individual cells with damaged chromosomes  
624 are capable of progressing through the cell cycle and undergoing a subsequent  
625 cell division.

626

627 **Fig 11. Article Summary: Mitotic DNA Damage Response.** (A) A 780nm  
628 femtosecond laser was focused to a sub-micron region on a mitotic chromosome.  
629 End breaks detected via TUNEL assay and cyclo-butane pyrimidine dimers were  
630 found at the laser damage site. (B) Several factors cluster to the damage site. In  
631 bold are the repair pathway abbreviations that each factor is most closely  
632 associated with. Non-Homologous End Joining (NHEJ), Single Strand Break  
633 Repair (SSBR), Base Excision Repair(BER), Homologous Recombination(HR)  
634 Post translational modifications(PTM), Nucleotide excision repair(NER). DNA  
635 synthesis occurs at the damaged chromosome region as detected via EdU  
636 incorporation. Phosphorylated Histone  $\gamma$ H2AX on Serine 139 marks double strand  
637 breaks and extends from the laser damage spot.

638

639 **The laser as a method to elucidate the DDR during mitosis**

640 Using the highly focused NIR laser we have determined that the mitotic DNA  
641 damage response is more extensive than previously thought. This is likely due to  
642 a large amount of DNA damage in a small submicron volume, thus enabling  
643 detection of a high concentration of damage factors. Previous studies have utilized  
644 ionizing radiation and radiomimetic drugs to induce DSBs. Such studies did not  
645 show the accumulation of ubiquitin (Ub), RNF8, RNF168, BRCA1, 53BP1 to mitotic  
646 chromosomes [2, 5-14]. However, the results of those studies relied upon ionizing  
647 radiation induced foci formation which has been shown to be distinct from initial  
648 recruitment of the DNA damage-recognition factors and entails further clustering  
649 of proteins as well as amplification signals that surround damage sites [49, 66].  
650 Nevertheless, we previously observed, using this same laser, that Ub was  
651 occurring at laser induced DSBs on mitotic chromosomes that coincided with KU  
652 staining [28, 38]. Additionally, the results in the present study show that BRCA1  
653 and 53BP1 can localize to mitotic DNA damage sites. In line with this, Pederson  
654 et. Al. found 53BP1 foci on PICH associated ultrafine anaphase bridges and on  
655 chromosomes [67]. Therefore, the mechanisms regulating these interactions are  
656 more complex and likely depend on the type of damage, quantity and the phase in  
657 which damage is induced.

658

659 **Mitotic DDR may attempt to repair chromosomes by more than one pathway**

660 Our results show that NHEJ was activated and was likely repairing some of

661 the laser induced DNA damage. Interestingly, the KU signal was lower when the  
662 DNA ligase signal was greater. These results suggest NHEJ repair of DSBs.  
663 However, a decrease in KU binding may also be due to the abortive initiation of  
664 homologous recombination (HR). Mitotic cells may activate alternative-NHEJ, cells  
665 deficient in DNA-PKcs (a key component of NHEJ), still synthesized DNA. On the  
666 other hand, inhibition of PARP (a key player in alt-NHEJ) in these cells did not  
667 decrease DNA repair synthesis; instead, DNA repair synthesis appeared to  
668 increase. This result suggests that PARP has inhibitory effects on mitotic DNA  
669 repair and that HR may have been stimulated when both PARP and DNA-PKcs  
670 are compromised. Nevertheless, ATM inhibition alone did not decrease DNA repair  
671 synthesis. However, a decrease occurred when both ATM and DNA-PKcs activity  
672 was compromised. This is not surprising given that ATM and DNA PKcs are key  
673 to the DSB repair response in that they can phosphorylate  $\gamma$ H2AX[68]. Further,  
674 ATM activity was recently shown to be important for NER [69]. Therefore, DNA  
675 repair synthesis may occur in response to different pathways depending on the  
676 cell conditions and/or availability of specific repair proteins. Future studies are  
677 required to investigate the ability of mitotic cells to undergo NER. Our results  
678 showing that the laser is capable of inducing UV type damage demonstrate this to  
679 be an excellent tool toward that end.

680 Further, the complex nature of laser damage likely leads to the activity of  
681 multiple repair pathways. Consistent with this, factors involved in BER/SSB repair  
682 APE1 and XRCC1 were also detected at mitotic chromosomes after laser damage.  
683 These results are consistent with a previous study that found similar results when

684 mitotic cells were treated with hydrogen peroxide to induce DNA damage [70].

685        Though HR repair in mitosis is repressed and sister chromatids are  
686 separately condensed, the chromatin may be prepared for HR repair by end  
687 resection visualized through increased RPA binding and expansion. Even when  
688 cells are kept in mitosis for prolonged periods by nocodazole, downstream repair  
689 activation by RAD51 filament formation is not observed; nor is it observed in late  
690 stages of mitosis such as telophase. However, consistent with previous non-laser  
691 studies, RAD51 is more likely to be recruited to mitotic DNA damage when CDK1  
692 is inhibited. Greater RAD51 recruitment was readily observed in the absence of  
693 DNA PKcs. These results demonstrate that DNA-PKcs is critical to blocking  
694 RAD51 recruitment during mitosis and that laser damaged mitotic chromosomes  
695 may have a greater ability to recruit NHEJ factors.

696

### 697 **Mitotic DNA repair synthesis via different means**

698        Mitotic DNA repair synthesis is not a laser specific phenomenon. Treatment  
699 of mitotic cells with a conventional UV light source also resulted in EdU  
700 incorporation, indicating that this type of DNA repair synthesis is not a laser  
701 damage-specific phenomenon. Previous studies have shown that replication  
702 stress induced DNA damage can lead to DNA repair synthesis in very early  
703 prophase but not later phases of mitosis. Cells synchronized in nocodazole did not  
704 undergo DNA repair synthesis [16, 17]. However, the mechanism of DNA repair  
705 synthesis observed in our studies likely differs from those studies in that (1) our  
706 damage is inflicted in later prophase, metaphase and anaphase and (2) our

707 damage is not due to active replication stress induced repair. The process  
708 described in Bhowmick et al., 2016 and Minocherhomiji et al., 2015 is dependent  
709 on Rad52 and MUS81-EME1. It may be interesting to determine whether DNA  
710 damage induced in early prophase by means other than replication stress requires  
711 the same factors, or determine how inhibition of ATM and DNA-PKcs affects  
712 replication stress induced repair that is observed in early prophase.

713

#### 714 **Damage induced in Metaphase is more deleterious for cell division**

715 We investigated the ability of cells damaged in mitosis to enter a second  
716 mitosis. This is an important question raised by early studies using a different laser  
717 (argon ion laser emitting 488 or 514 nm light) where mitotic cells with focal damage  
718 to a single chromosome were still able to undergo a subsequent mitosis and  
719 produce apparently normal cells [26]. This is significant because entry into second  
720 mitosis is indicative of checkpoint recovery and thus DNA repair to the point that it  
721 is no longer halting cell cycle progression. Under our laser conditions, we  
722 observed that a significant percentage (25%) of cells damaged in mitosis undergo  
723 a second division. This fraction varies depending on the phase in which damage  
724 was induced. Cells damaged in metaphase were less likely to enter a second  
725 division in comparison to cells damaged in anaphase or G1. This may be caused  
726 by irradiation of a more compacted metaphase chromosome resulting in more DNA  
727 damage than in G1. The DNA repair pathway choice in mitosis can be another  
728 important factor.

729 In conclusion, our results show that (1) mitotic cells are capable of DNA repair

730 synthesis, (2) factors from multiple repair pathways can localize to mitotic DNA  
731 damage; therefore, DNA repair synthesis may be a result of one or more repair  
732 mechanisms, (3) DNA repair synthesis is compromised when ATM and DNA-Pkcs  
733 are inhibited; individual inhibition did not show significant changes, and (4) 25% of  
734 cells carrying mitotic DNA damage are able to undergo DNA repair, progress  
735 through the cell cycle, and enter a subsequent division.

736

737

738

739

740

## 741 **Supplemental Information**

742

743 S1 Assessment of the mitotic DNA damage response

744 S2 DNA damage response in different cell lines (M059K, M059J and CFPAC1).

745 S3 Time to cell division summary and antibody list

746

747

## 748 **Acknowledgements**

749

750 A special thanks to Arthur Forer, PhD (York University, Toronto, ON) and Phang-  
751 Lang Chen (UC-Irvine, Irvine, Ca) for thought provoking conversations on mitotic  
752 responses to damage.

753

754

## 755 **References**

756

757 1. Castedo M, Perfettini JL, Roumier T, Valent A, Raslova H, Yakushijin K, et  
758 al. Mitotic catastrophe constitutes a special case of apoptosis whose suppression  
759 entails aneuploidy. *Oncogene*. 2004;23(25):4362-70. doi:

760 10.1038/sj.onc.1207572. PubMed PMID: 15048075.



- 761 2. Orthwein A, Fradet-Turcotte A, Noordermeer SM, Canny MD, Brun CM,  
762 Strecker J, et al. Mitosis inhibits DNA double-strand break repair to guard against  
763 telomere fusions. *Science*. 2014;344(6180):189-93. doi:  
764 10.1126/science.1248024. PubMed PMID: 24652939.
- 765 3. Crasta K, Ganem NJ, Dagher R, Lantermann AB, Ivanova EV, Pan Y, et  
766 al. DNA breaks and chromosome pulverization from errors in mitosis. *Nature*.  
767 2012;482(7383):53-8. doi: 10.1038/nature10802. PubMed PMID: 22258507;  
768 PubMed Central PMCID: PMC3271137.
- 769 4. Bakhoun SF, Kabeche L, Compton DA, Powell SN, Bastians H. Mitotic  
770 DNA Damage Response: At the Crossroads of Structural and Numerical Cancer  
771 Chromosome Instabilities. *Trends Cancer*. 2017;3(3):225-34. doi:  
772 10.1016/j.trecan.2017.02.001. PubMed PMID: 28718433; PubMed Central  
773 PMCID: PMC5518619.
- 774 5. Giunta S, Belotserkovskaya R, Jackson SP. DNA damage signaling in  
775 response to double-strand breaks during mitosis. *J Cell Biol*. 2010;190(2):197-  
776 207. Epub 2010/07/28. doi: jcb.200911156 [pii]  
777 10.1083/jcb.200911156. PubMed PMID: 20660628.
- 778 6. Huang X, Tran T, Zhang L, Hatcher R, Zhang P. DNA damage-induced  
779 mitotic catastrophe is mediated by the Chk1-dependent mitotic exit DNA damage  
780 checkpoint. *Proceedings of the National Academy of Sciences of the United  
781 States of America*. 2005;102(4):1065-70. Epub 2005/01/15. doi:  
782 10.1073/pnas.0409130102. PubMed PMID: 15650047; PubMed Central PMCID:  
783 PMC545827.
- 784 7. Lee DH, Acharya SS, Kwon M, Drane P, Guan Y, Adelmant G, et al.  
785 Dephosphorylation enables the recruitment of 53BP1 to double-strand DNA  
786 breaks. *Mol Cell*. 2014;54(3):512-25. doi: 10.1016/j.molcel.2014.03.020. PubMed  
787 PMID: 24703952; PubMed Central PMCID: PMC4030556.
- 788 8. Nelson G, Buhmann M, von Zglinicki T. DNA damage foci in mitosis are  
789 devoid of 53BP1. *Cell Cycle*. 2009;8(20):3379-83. Epub 2009/10/07. PubMed  
790 PMID: 19806024.
- 791 9. Wei Zhang GP, Shiaw-Yin Lin and Pumin Zhang. DNA damage response  
792 is suppressed by high Cdk1 activity in mitotic mammalian cells. *Journal of  
793 Biological Chemistry*. 2011;107(15):6870-5. Epub March, 29, 2010.
- 794 10. Zhang W, Peng G, Lin SY, Zhang P. DNA Damage Response Is  
795 Suppressed by the High Cyclin-dependent Kinase 1 Activity in Mitotic  
796 Mammalian Cells. *Journal of Biological Chemistry*. 2011;286(41):35899-905. doi:  
797 10.1074/jbc.M111.267690.
- 798 11. van Vugt MA, Gardino AK, Linding R, Ostheimer GJ, Reinhardt HC, Ong  
799 SE, et al. A mitotic phosphorylation feedback network connects Cdk1, Plk1,

- 800 53BP1, and Chk2 to inactivate the G(2)/M DNA damage checkpoint. *PLoS Biol.*  
801 2010;8(1):e1000287. doi: 10.1371/journal.pbio.1000287. PubMed PMID:  
802 20126263; PubMed Central PMCID: PMCPMC2811157.
- 803 12. Benada J, Burdova K, Lidak T, von Morgen P, Macurek L. Polo-like kinase  
804 1 inhibits DNA damage response during mitosis. *Cell Cycle.* 2015;14(2):219-31.  
805 doi: 10.4161/15384101.2014.977067. PubMed PMID: 25607646; PubMed  
806 Central PMCID: PMCPMC4613155.
- 807 13. Peterson SE, Li Y, Chait BT, Gottesman ME, Baer R, Gautier J. Cdk1  
808 uncouples CtIP-dependent resection and Rad51 filament formation during M-  
809 phase double-strand break repair. *The Journal of Cell Biology.* 2011;194(5):705-  
810 20. doi: 10.1083/jcb.201103103.
- 811 14. Terasawa M, Shinohara A, Shinohara M. Canonical non-homologous end  
812 joining in mitosis induces genome instability and is suppressed by M-phase-  
813 specific phosphorylation of XRCC4. *PLoS Genet.* 2014;10(8):e1004563. doi:  
814 10.1371/journal.pgen.1004563. PubMed PMID: 25166505; PubMed Central  
815 PMCID: PMCPMC4148217.
- 816 15. Feng W, Jasin M. Homologous Recombination and Replication Fork  
817 Protection: BRCA2 and More! *Cold Spring Harb Symp Quant Biol.* 2017;82:329-  
818 38. doi: 10.1101/sqb.2017.82.035006. PubMed PMID: 29686033; PubMed  
819 Central PMCID: PMCPMC6333483.
- 820 16. Bhowmick R, Minocherhomji S, Hickson ID. RAD52 Facilitates Mitotic  
821 DNA Synthesis Following Replication Stress. *Mol Cell.* 2016;64(6):1117-26. doi:  
822 10.1016/j.molcel.2016.10.037. PubMed PMID: 27984745.
- 823 17. Minocherhomji S, Ying S, Bjerregaard VA, Bursomanno S, Aleliunaite A,  
824 Wu W, et al. Replication stress activates DNA repair synthesis in mitosis. *Nature.*  
825 2015;528(7581):286-90. doi: 10.1038/nature16139. PubMed PMID: 26633632.
- 826 18. Ying S, Minocherhomji S, Chan KL, Palmal-Pallag T, Chu WK, Wass T, et  
827 al. MUS81 promotes common fragile site expression. *Nat Cell Biol.*  
828 2013;15(8):1001-7. doi: 10.1038/ncb2773. PubMed PMID: 23811685.
- 829 19. Hanada K, Budzowska M, Davies SL, van Drunen E, Onizawa H, Beverloo  
830 HB, et al. The structure-specific endonuclease Mus81 contributes to replication  
831 restart by generating double-strand DNA breaks. *Nat Struct Mol Biol.*  
832 2007;14(11):1096-104. doi: 10.1038/nsmb1313. PubMed PMID: 17934473.
- 833 20. Davies SL, North PS, Hickson ID. Role for BLM in replication-fork restart  
834 and suppression of origin firing after replicative stress. *Nat Struct Mol Biol.*  
835 2007;14(7):677-9. doi: 10.1038/nsmb1267. PubMed PMID: 17603497.
- 836 21. Min J, Wright WE, Shay JW. Alternative Lengthening of Telomeres  
837 Mediated by Mitotic DNA Synthesis Engages Break-Induced Replication

- 838 Processes. *Mol Cell Biol.* 2017;37(20). doi: 10.1128/MCB.00226-17. PubMed  
839 PMID: 28760773; PubMed Central PMCID: PMCPMC5615184.
- 840 22. Feng W, Jasin M. BRCA2 suppresses replication stress-induced mitotic  
841 and G1 abnormalities through homologous recombination. *Nat Commun.*  
842 2017;8(1):525. doi: 10.1038/s41467-017-00634-0. PubMed PMID: 28904335;  
843 PubMed Central PMCID: PMCPMC5597640.
- 844 23. Berns MW. Directed chromosome loss by laser microirradiation. *Science.*  
845 1974;186(4165):700-5. Epub 1974/11/22. PubMed PMID: 4607753.
- 846 24. Berns MW. Laser microirradiation of chromosomes. *Cold Spring Harb*  
847 *Symp Quant Biol.* 1974;38:165-74. Epub 1974/01/01. PubMed PMID: 4133983.
- 848 25. Berns MW. The laser microbeam as a probe for chromatin structure and  
849 function. *Methods Cell Biol.* 1978;18:277-94. Epub 1978/01/01. PubMed PMID:  
850 683019.
- 851 26. Berns MW, Cheng WK, Hoover G. Cell division after laser microirradiation  
852 of mitotic chromosomes. *Nature.* 1971;233(5315):122-3. Epub 1971/09/10.  
853 PubMed PMID: 12058751.
- 854 27. Berns MW, Olson RS, Rounds DE. In vitro production of chromosomal  
855 lesions with an argon laser microbeam. *Nature.* 1969;221(5175):74-5. Epub  
856 1969/01/04. PubMed PMID: 4882051.
- 857 28. Gomez-Godinez V, Wu T, Sherman AJ, Lee CS, Liaw LH, Zhongsheng Y,  
858 et al. Analysis of DNA double-strand break response and chromatin structure in  
859 mitosis using laser microirradiation. *Nucleic Acids Res.* 38(22):e202. Epub  
860 2010/10/07. doi: gkq836 [pii]  
861 10.1093/nar/gkq836. PubMed PMID: 20923785; PubMed Central PMCID:  
862 PMC3001094.
- 863 29. Silva BA, Stambaugh JR, Yokomori K, Shah JV, Berns MW. DNA damage  
864 to a single chromosome end delays anaphase onset. *J Biol Chem.*  
865 2014;289(33):22771-84. doi: 10.1074/jbc.M113.535955. PubMed PMID:  
866 24982423; PubMed Central PMCID: PMCPMC4132783.
- 867 30. Berns MW, Chong LK, Hammer-Wilson M, Miller K, Siemens A. Genetic  
868 microsurgery by laser: establishment of a clonal population of rat kangaroo cells  
869 (PTK2) with a directed deficiency in a chromosomal nucleolar organizer.  
870 *Chromosoma.* 1979;73(1):1-8. Epub 1979/06/21. PubMed PMID: 487905.
- 871 31. Kong X, Mohanty SK, Stephens J, Heale JT, Gomez-Godinez V, Shi LZ,  
872 et al. Comparative analysis of different laser systems to study cellular responses  
873 to DNA damage in mammalian cells. *Nucleic Acids Res.* 2009;37(9):e68. doi:  
874 10.1093/nar/gkp221. PubMed PMID: 19357094; PubMed Central PMCID:  
875 PMCPMC2685111.

- 876 32. Saquilabon Cruz GM, Kong X, Silva BA, Khatibzadeh N, Thai R, Berns  
877 MW, et al. Femtosecond near-infrared laser microirradiation reveals a crucial role  
878 for PARP signaling on factor assemblies at DNA damage sites. *Nucleic Acids*  
879 *Res.* 2016;44(3):e27. doi: 10.1093/nar/gkv976. PubMed PMID: 26424850;  
880 PubMed Central PMCID: PMCPMC4756852.
- 881 33. Gomez-Godinez V, Wakida NM, Dvornikov AS, Yokomori K, Berns MW.  
882 Recruitment of DNA damage recognition and repair pathway proteins following  
883 near-IR femtosecond laser irradiation of cells. *J Biomed Opt.* 2007;12(2):020505.  
884 doi: 10.1117/1.2717684. PubMed PMID: 17477704.
- 885 34. Gomez-Godinez V, Wu T, Sherman AJ, Lee CS, Liaw LH, Zhongsheng Y,  
886 et al. Analysis of DNA double-strand break response and chromatin structure in  
887 mitosis using laser microirradiation. *Nucleic Acids Res.* 2010;38(22):e202. doi:  
888 10.1093/nar/gkq836. PubMed PMID: 20923785; PubMed Central PMCID:  
889 PMCPMC3001094.
- 890 35. Kong X, Ball AR, Jr., Pham HX, Zeng W, Chen HY, Schmiesing JA, et al.  
891 Distinct functions of human cohesin-SA1 and cohesin-SA2 in double-strand  
892 break repair. *Mol Cell Biol.* 2014;34(4):685-98. doi: 10.1128/MCB.01503-13.  
893 PubMed PMID: 24324008; PubMed Central PMCID: PMCPMC3911484.
- 894 36. Kong X, Stephens J, Ball AR, Jr., Heale JT, Newkirk DA, Berns MW, et al.  
895 Condensin I recruitment to base damage-enriched DNA lesions is modulated by  
896 PARP1. *PLoS One.* 2011;6(8):e23548. doi: 10.1371/journal.pone.0023548.  
897 PubMed PMID: 21858164; PubMed Central PMCID: PMCPMC3155556.
- 898 37. Silva BA, Stambaugh JR, Berns MW. Targeting telomere-containing  
899 chromosome ends with a near-infrared femtosecond laser to study the activation  
900 of the DNA damage response and DNA damage repair pathways. *J Biomed Opt.*  
901 2013;18(9):095003. doi: 10.1117/1.JBO.18.9.095003. PubMed PMID: 24064949;  
902 PubMed Central PMCID: PMCPMC3782557.
- 903 38. Mari PO, Florea BI, Persengiev SP, Verkaik NS, Bruggenwirth HT,  
904 Modesti M, et al. Dynamic assembly of end-joining complexes requires  
905 interaction between Ku70/80 and XRCC4. *Proc Natl Acad Sci U S A.*  
906 2006;103(49):18597-602. Epub 2006/11/25. doi: 0609061103 [pii]  
907 10.1073/pnas.0609061103. PubMed PMID: 17124166; PubMed Central PMCID:  
908 PMC1693708.
- 909 39. Saquilabon Cruz GM, Kong X, Silva BA, Khatibzadeh N, Thai R, Berns  
910 MW, et al. Femtosecond near-infrared laser microirradiation reveals a crucial role  
911 for PARP signaling on factor assemblies at DNA damage sites. *Nucleic Acids*  
912 *Res.* 2015. doi: 10.1093/nar/gkv976. PubMed PMID: 26424850.
- 913 40. Wakida NM, Lee CS, Botvinick ET, Shi LZ, Dvornikov A, Berns MW. Laser  
914 nanosurgery of single microtubules reveals location-dependent depolymerization

- 915 rates. *Journal of biomedical optics*. 2007;12(2):024022. Epub 2007/05/05. doi:  
916 10.1117/1.2718920. PubMed PMID: 17477737.
- 917 41. Gomez-Godinez V, Wakida NM, Dvornikov AS, Yokomori K, Berns MW.  
918 Recruitment of DNA damage recognition and repair pathway proteins following  
919 near-IR femtosecond laser irradiation of cells. *Journal of biomedical optics*.  
920 2007;12(2):020505. Epub 2007/05/05. doi: 10.1117/1.2717684. PubMed PMID:  
921 17477704.
- 922 42. Botvinick EL, Venugopalan V, Shah JV, Liaw LH, Berns MW. Controlled  
923 ablation of microtubules using a picosecond laser. *Biophys J*. 2004;87(6):4203-  
924 12. Epub 2004/09/30. doi: 10.1529/biophysj.104.049528  
925 S0006-3495(04)73884-9 [pii]. PubMed PMID: 15454403; PubMed Central  
926 PMCID: PMC1304929.
- 927 43. Rasband WS. ImageJ Bethesda, Maryland, USA: US. National Institutes  
928 of Health; 1997-2009. Available from: <http://rsb.info.nih.gov/ij/>, .
- 929 44. London RE. The structural basis of XRCC1-mediated DNA repair. *DNA*  
930 *Repair (Amst)*. 2015;30:90-103. doi: 10.1016/j.dnarep.2015.02.005. PubMed  
931 PMID: 25795425; PubMed Central PMCID: PMCPMC5580684.
- 932 45. Rogakou EP, Pilch DR, Orr AH, Ivanova VS, Bonner WM. DNA double-  
933 stranded breaks induce histone H2AX phosphorylation on serine 139. *J Biol*  
934 *Chem*. 1998;273(10):5858-68. Epub 1998/04/16. PubMed PMID: 9488723.
- 935 46. Rogakou EP, Boon C, Redon C, Bonner WM. Megabase chromatin  
936 domains involved in DNA double-strand breaks in vivo. *J Cell Biol*.  
937 1999;146(5):905-16. Epub 1999/09/09. PubMed PMID: 10477747; PubMed  
938 Central PMCID: PMC2169482.
- 939 47. Iarovaia OV, Rubtsov M, Ioudinkova E, Tsfasman T, Razin SV, Vassetzky  
940 YS. Dynamics of double strand breaks and chromosomal translocations. *Mol*  
941 *Cancer*. 2014;13:249. doi: 10.1186/1476-4598-13-249. PubMed PMID:  
942 25404525; PubMed Central PMCID: PMCPMC4289179.
- 943 48. Uziel T, Lerenthal Y, Moyal L, Andegeko Y, Mittelman L, Shiloh Y.  
944 Requirement of the MRN complex for ATM activation by DNA damage. *EMBO J*.  
945 2003;22(20):5612-21. Epub 2003/10/09. doi: 10.1093/emboj/cdg541. PubMed  
946 PMID: 14532133; PubMed Central PMCID: PMC213795.
- 947 49. Kim JS, Krasieva TB, Kurumizaka H, Chen DJ, Taylor AM, Yokomori K.  
948 Independent and sequential recruitment of NHEJ and HR factors to DNA damage  
949 sites in mammalian cells. *J Cell Biol*. 2005;170(3):341-7. Epub 2005/08/03. doi:  
950 jcb.200411083 [pii]  
951 10.1083/jcb.200411083. PubMed PMID: 16061690; PubMed Central PMCID:  
952 PMC2171485.

- 953 50. Lukas C, Melander F, Stucki M, Falck J, Bekker-Jensen S, Goldberg M, et  
954 al. Mdc1 couples DNA double-strand break recognition by Nbs1 with its H2AX-  
955 dependent chromatin retention. *Embo J.* 2004;23(13):2674-83. PubMed PMID:  
956 15201865.
- 957 51. Giunta S, Belotserkovskaya R, Jackson SP. DNA damage signaling in  
958 response to double-strand breaks during mitosis. *J Cell Biol.* 190(2):197-207.  
959 Epub 2010/07/28. doi: [jcb.200911156](https://doi.org/10.1083/jcb.200911156) [pii]  
960 10.1083/jcb.200911156. PubMed PMID: 20660628.
- 961 52. Stewart GS. Solving the RIDDLE of 53BP1 recruitment to sites of damage.  
962 *Cell Cycle.* 2009;8(10):1532-8. Epub 2009/04/18. doi: [8351](https://doi.org/10.4161/cc.8101) [pii]. PubMed PMID:  
963 19372751.
- 964 53. Stewart GS, Panier S, Townsend K, Al-Hakim AK, Kolas NK, Miller ES, et  
965 al. The RIDDLE syndrome protein mediates a ubiquitin-dependent signaling  
966 cascade at sites of DNA damage. *Cell.* 2009;136(3):420-34. Epub 2009/02/11.  
967 doi: [S0092-8674\(09\)00005-1](https://doi.org/10.1016/j.cell.2008.12.042) [pii]  
968 10.1016/j.cell.2008.12.042. PubMed PMID: 19203578.
- 969 54. Perrault R, Wang H, Wang M, Rosidi B, Iliakis G. Backup pathways of  
970 NHEJ are suppressed by DNA-PK. *Journal of cellular biochemistry.*  
971 2004;92(4):781-94. Epub 2004/06/24. doi: [10.1002/jcb.20104](https://doi.org/10.1002/jcb.20104). PubMed PMID:  
972 15211575.
- 973 55. Mansour WY, Rhein T, Dahm-Daphi J. The alternative end-joining  
974 pathway for repair of DNA double-strand breaks requires PARP1 but is not  
975 dependent upon microhomologies. *Nucleic Acids Res.* 2010;38(18):6065-77. doi:  
976 [10.1093/nar/gkq387](https://doi.org/10.1093/nar/gkq387). PubMed PMID: 20483915; PubMed Central PMCID:  
977 PMCPMC2952854.
- 978 56. Wang M, Wu W, Wu W, Rosidi B, Zhang L, Wang H, et al. PARP-1 and  
979 Ku compete for repair of DNA double strand breaks by distinct NHEJ pathways.  
980 *Nucleic Acids Res.* 2006;34(21):6170-82. doi: [10.1093/nar/gkl840](https://doi.org/10.1093/nar/gkl840). PubMed  
981 PMID: 17088286; PubMed Central PMCID: PMCPMC1693894.
- 982 57. Saberi A, Hochegger H, Szuts D, Lan L, Yasui A, Sale JE, et al. RAD18  
983 and poly(ADP-ribose) polymerase independently suppress the access of  
984 nonhomologous end joining to double-strand breaks and facilitate homologous  
985 recombination-mediated repair. *Mol Cell Biol.* 2007;27(7):2562-71. doi:  
986 [10.1128/MCB.01243-06](https://doi.org/10.1128/MCB.01243-06). PubMed PMID: 17242200; PubMed Central PMCID:  
987 PMCPMC1899888.
- 988 58. Dominguez-Bendala J, Masutani M, McWhir J. Down-regulation of PARP-  
989 1, but not of Ku80 or DNA-PKcs', results in higher gene targeting efficiency. *Cell*  
990 *Biol Int.* 2006;30(4):389-93. doi: [10.1016/j.cellbi.2005.12.005](https://doi.org/10.1016/j.cellbi.2005.12.005). PubMed PMID:  
991 16504547.

- 992 59. Bakr A, Oing C, Kocher S, Borgmann K, Dornreiter I, Petersen C, et al.  
993 Involvement of ATM in homologous recombination after end resection and  
994 RAD51 nucleofilament formation. *Nucleic Acids Res.* 2015;43(6):3154-66. doi:  
995 10.1093/nar/gkv160. PubMed PMID: 25753674; PubMed Central PMCID:  
996 PMCPMC4381069.
- 997 60. Beucher A, Birraux J, Tchouandong L, Barton O, Shibata A, Conrad S, et  
998 al. ATM and Artemis promote homologous recombination of radiation-induced  
999 DNA double-strand breaks in G2. *EMBO J.* 2009;28(21):3413-27. doi:  
1000 10.1038/emboj.2009.276. PubMed PMID: 19779458; PubMed Central PMCID:  
1001 PMCPMC2752027.
- 1002 61. Moynahan ME, Jasin M. Mitotic homologous recombination maintains  
1003 genomic stability and suppresses tumorigenesis. *Nature reviews Molecular cell  
1004 biology.* 2010;11(3):196-207. Epub 2010/02/24. doi: 10.1038/nrm2851. PubMed  
1005 PMID: 20177395; PubMed Central PMCID: PMC3261768.
- 1006 62. Peterson SE, Li Y, Chait BT, Gottesman ME, Baer R, Gautier J. Cdk1  
1007 uncouples CtIP-dependent resection and Rad51 filament formation during M-  
1008 phase double-strand break repair. *J Cell Biol.* 194(5):705-20. Epub 2011/09/07.  
1009 doi: jcb.201103103 [pii]  
1010 10.1083/jcb.201103103. PubMed PMID: 21893598; PubMed Central PMCID:  
1011 PMC3171114.
- 1012 63. Vassilev LT. Selective small-molecule inhibitor reveals critical mitotic  
1013 functions of human CDK1. *Proceedings of the National Academy of Sciences.*  
1014 2006;103(28):10660-5. doi: 10.1073/pnas.0600447103.
- 1015 64. Potts PR, Porteus MH, Yu H. Human SMC5/6 complex promotes sister  
1016 chromatid homologous recombination by recruiting the SMC1/3 cohesin complex  
1017 to double-strand breaks. *EMBO J.* 2006;25(14):3377-88. doi:  
1018 10.1038/sj.emboj.7601218. PubMed PMID: 16810316; PubMed Central PMCID:  
1019 PMCPMC1523187.
- 1020 65. Nishiyama T, Sykora MM, Huis in 't Veld PJ, Mechtler K, Peters JM.  
1021 Aurora B and Cdk1 mediate Wapl activation and release of acetylated cohesin  
1022 from chromosomes by phosphorylating Sororin. *Proc Natl Acad Sci U S A.*  
1023 2013;110(33):13404-9. doi: 10.1073/pnas.1305020110. PubMed PMID:  
1024 23901111; PubMed Central PMCID: PMCPMC3746921.
- 1025 66. Celeste A, Fernandez-Capetillo O, Kruhlak MJ, Pilch DR, Staudt DW, Lee  
1026 A, et al. Histone H2AX phosphorylation is dispensable for the initial recognition of  
1027 DNA breaks. *Nat Cell Biol.* 2003;5(7):675-9. Epub 2003/06/07. doi:  
1028 10.1038/ncb1004  
1029 ncb1004 [pii]. PubMed PMID: 12792649.
- 1030 67. Pedersen RT, Kruse T, Nilsson J, Oestergaard VH, Lisby M. TopBP1 is  
1031 required at mitosis to reduce transmission of DNA damage to G1 daughter cells.

- 1032 J Cell Biol. 2015;210(4):565-82. doi: 10.1083/jcb.201502107. PubMed PMID:  
1033 26283799; PubMed Central PMCID: PMC4539992.
- 1034 68. Stiff T, O'Driscoll M, Rief N, Iwabuchi K, Lobrich M, Jeggo PA. ATM and  
1035 DNA-PK function redundantly to phosphorylate H2AX after exposure to ionizing  
1036 radiation. *Cancer Res.* 2004;64(7):2390-6. PubMed PMID: 15059890.
- 1037 69. Wakasugi M, Sasaki T, Matsumoto M, Nagaoka M, Inoue K, Inobe M, et  
1038 al. Nucleotide excision repair-dependent DNA double-strand break formation and  
1039 ATM signaling activation in mammalian quiescent cells. *J Biol Chem.*  
1040 2014;289(41):28730-7. doi: 10.1074/jbc.M114.589747. PubMed PMID:  
1041 25164823; PubMed Central PMCID: PMC4192521.
- 1042 70. Okano S, Lan L, Tomkinson AE, Yasui A. Translocation of XRCC1 and  
1043 DNA ligase IIIalpha from centrosomes to chromosomes in response to DNA  
1044 damage in mitotic human cells. *Nucleic acids research.* 2005;33(1):422-9. Epub  
1045 2005/01/18. doi: 10.1093/nar/gki190. PubMed PMID: 15653642; PubMed Central  
1046 PMCID: PMC546168.  
1047  
1048  
1049

## 1050 Abbreviations

- 1051 DSB (double strand break), DDR (DNA damage response), HR (Homologous  
1052 Recombination Repair), NHEJ (Non-homologous end joining), NER (Nucleotide  
1053 Excision Repair), EdU (5-Ethynyl-2'-deoxyuridine), DNA PKcsi (DNA PKcs Inhibitor),  
1054 ATMi (ATM inhibitor), PARPi (PARP Inhibitor).



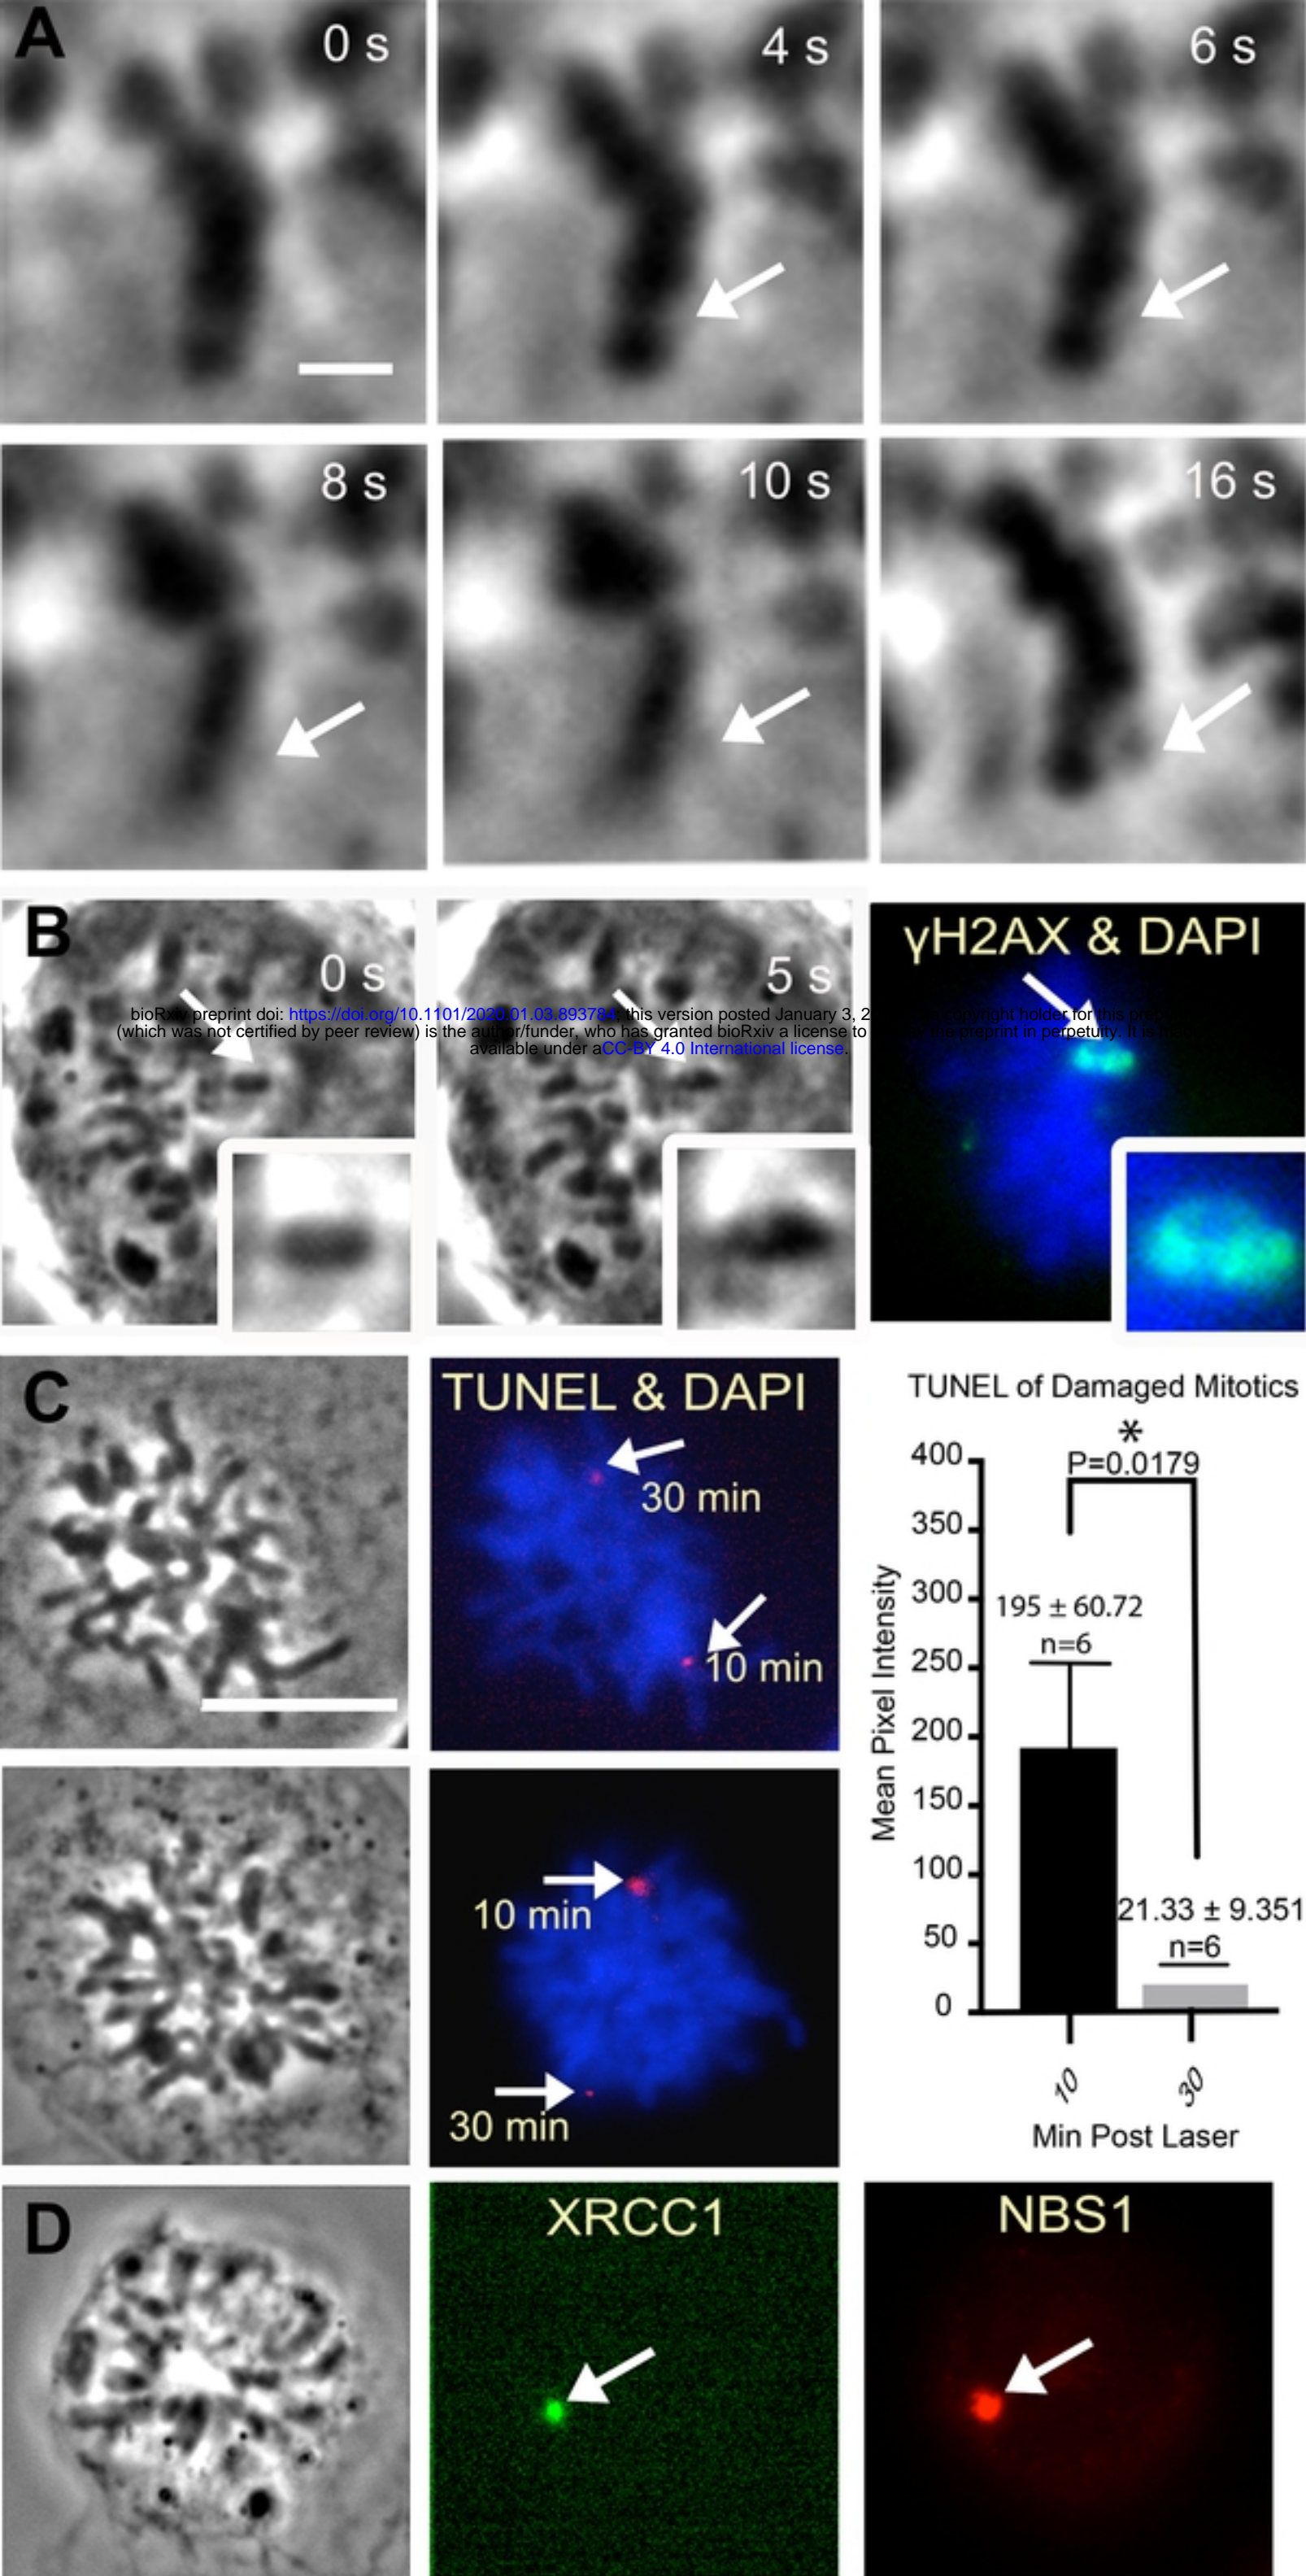

Fig1

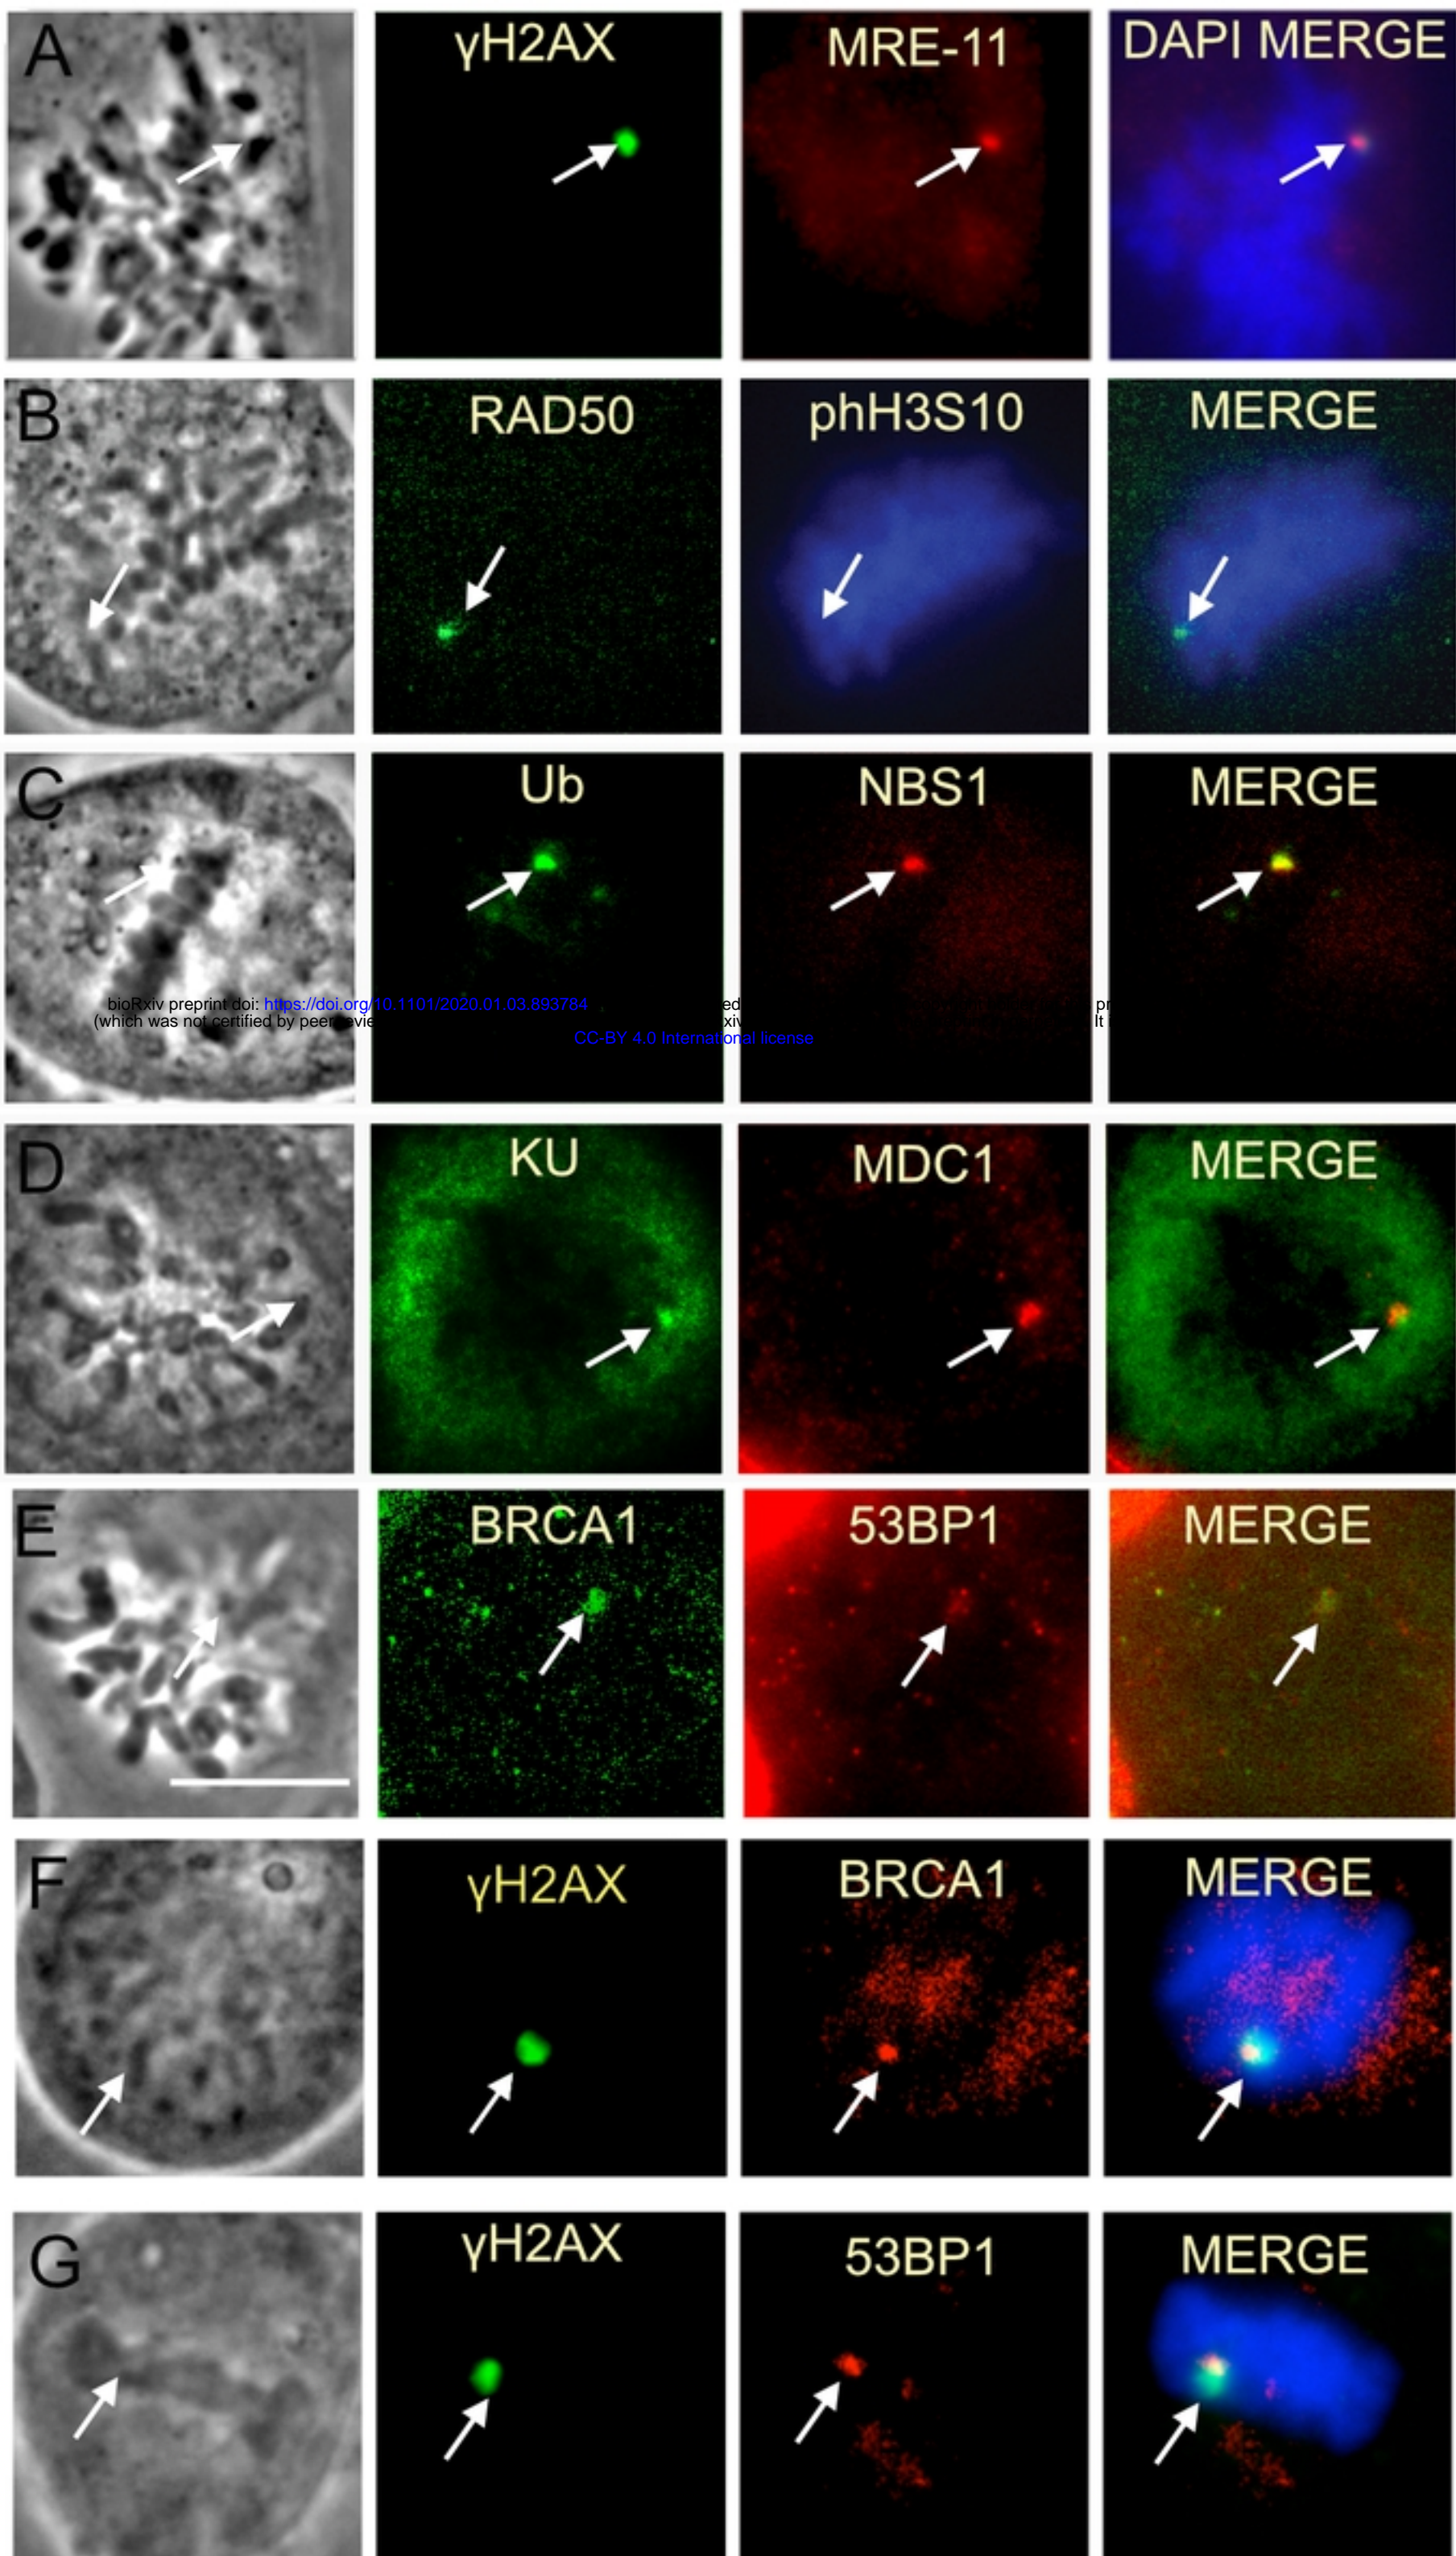

Fig2

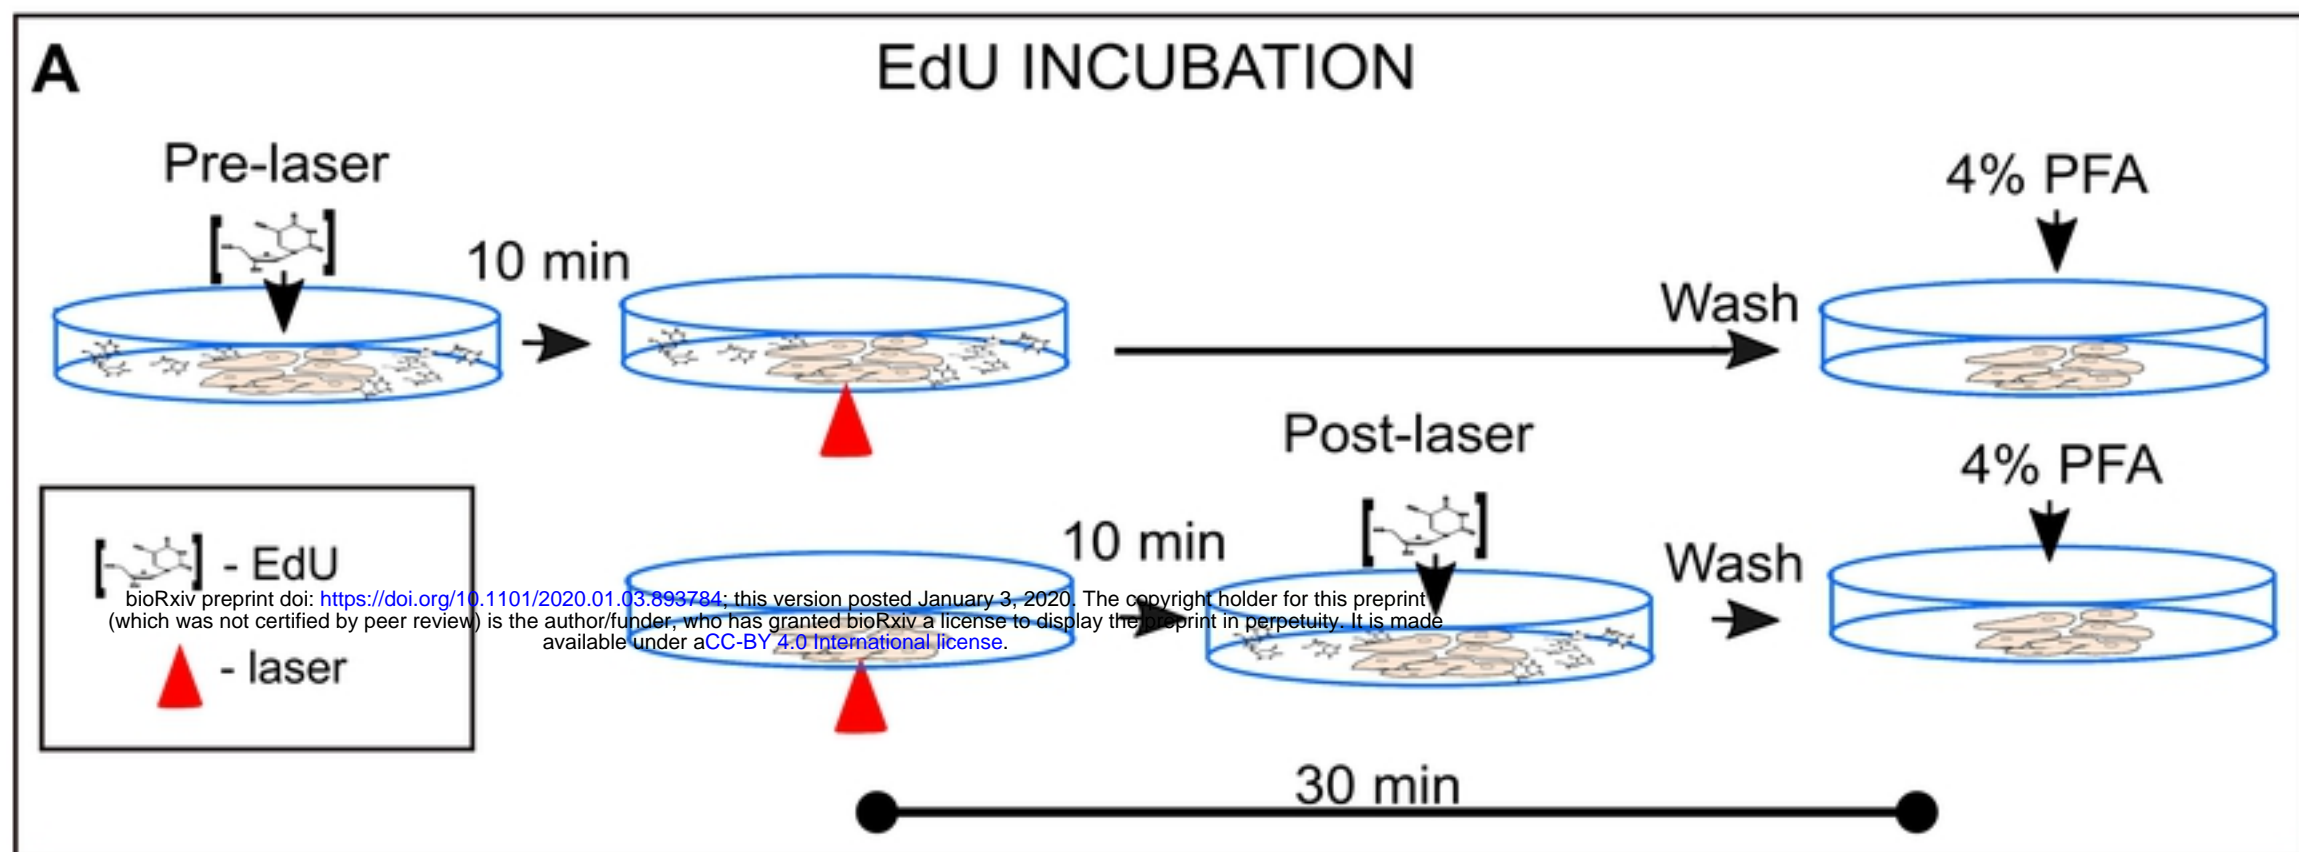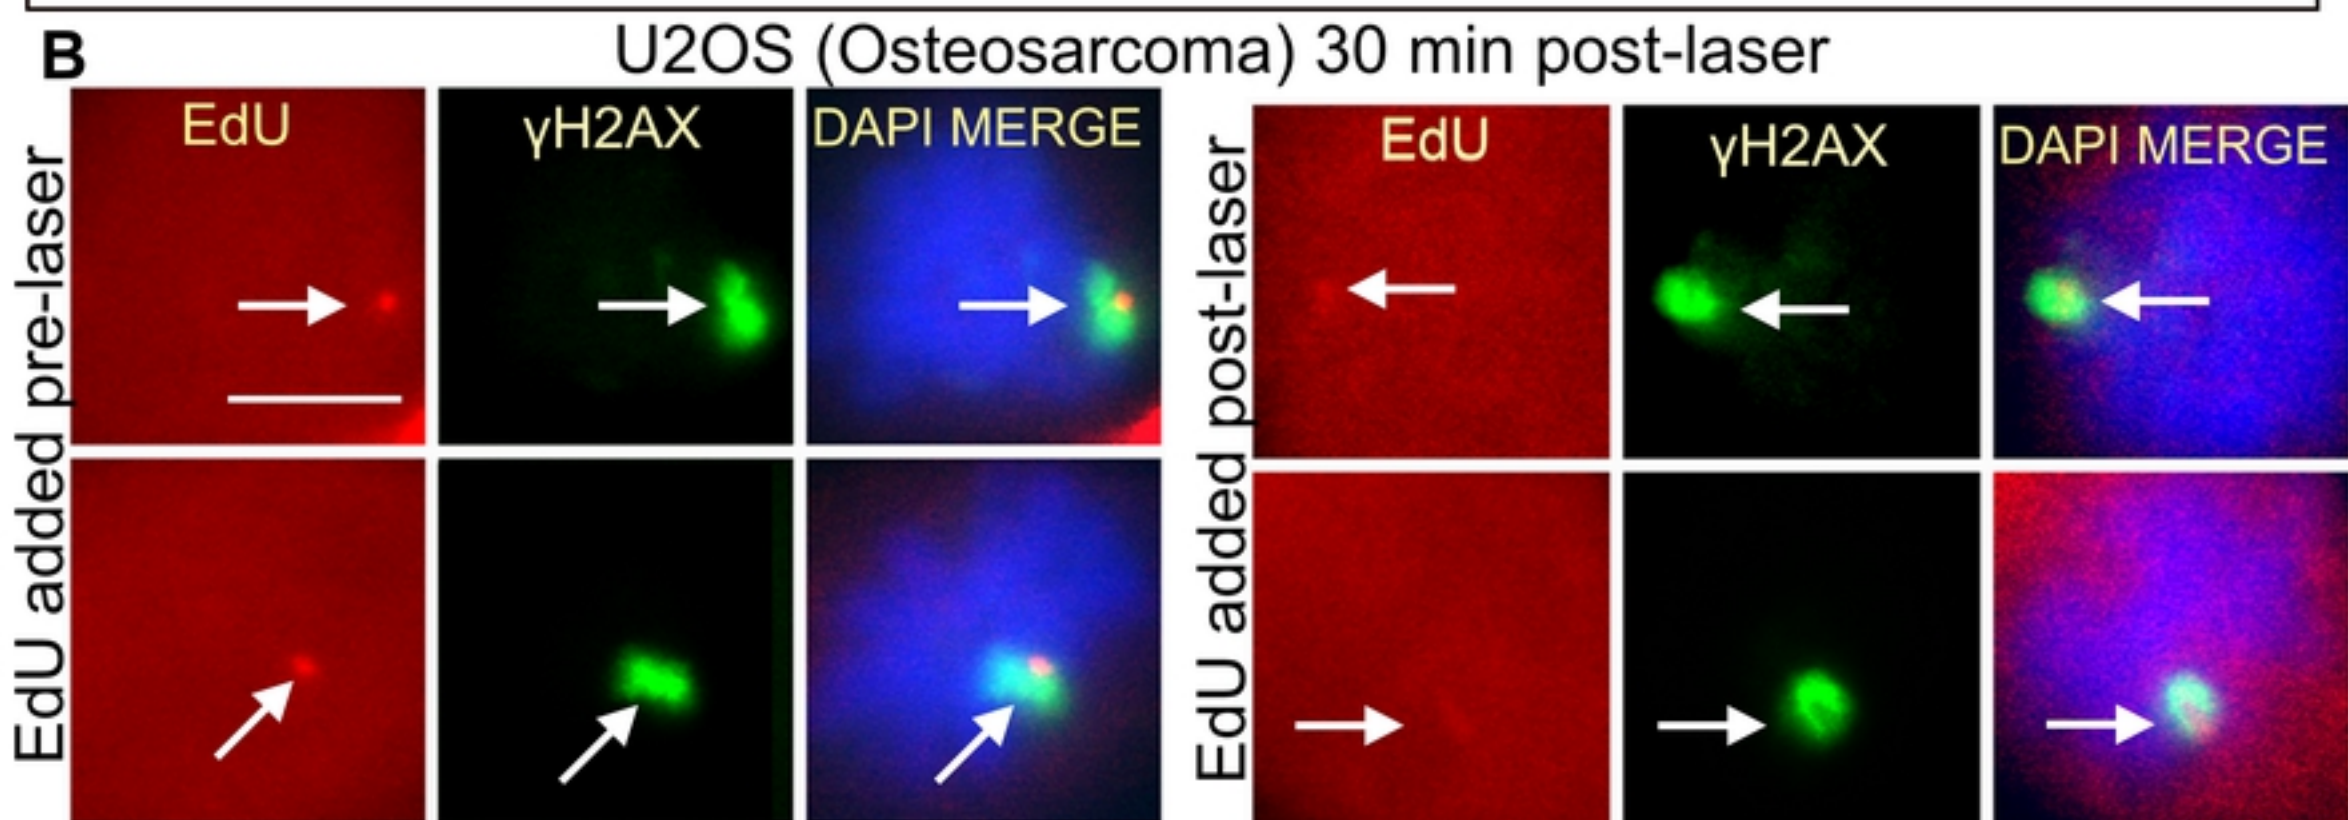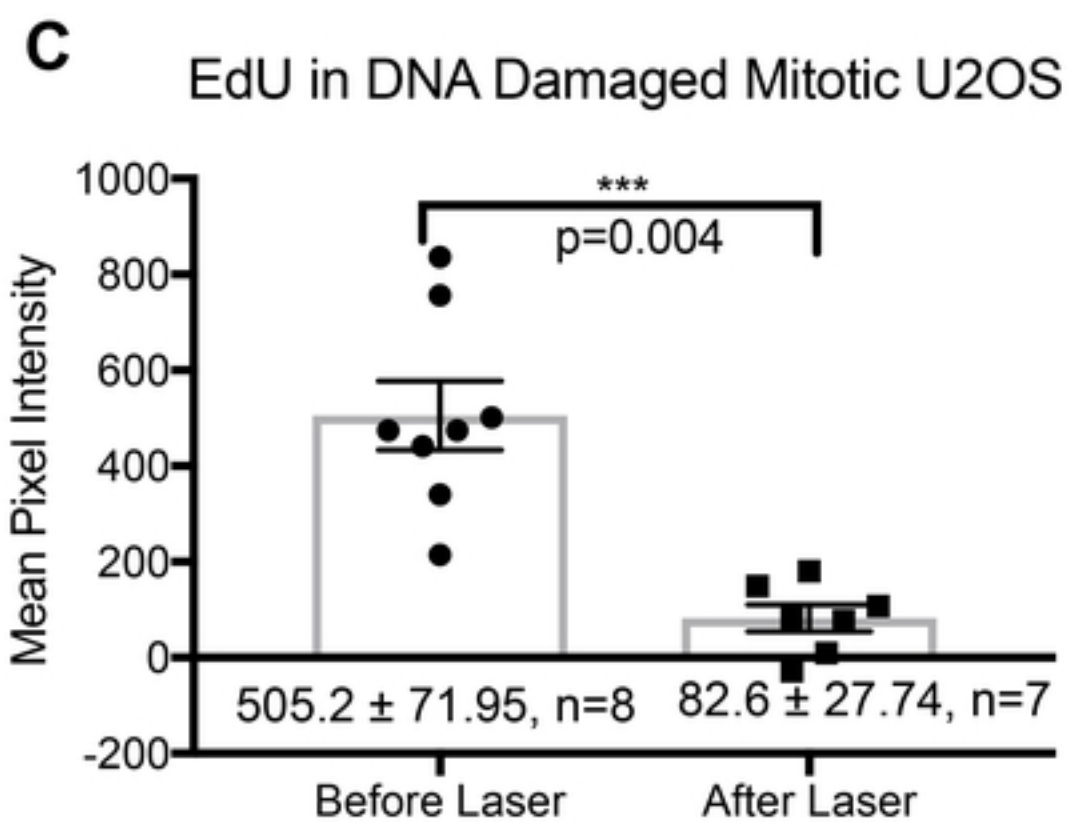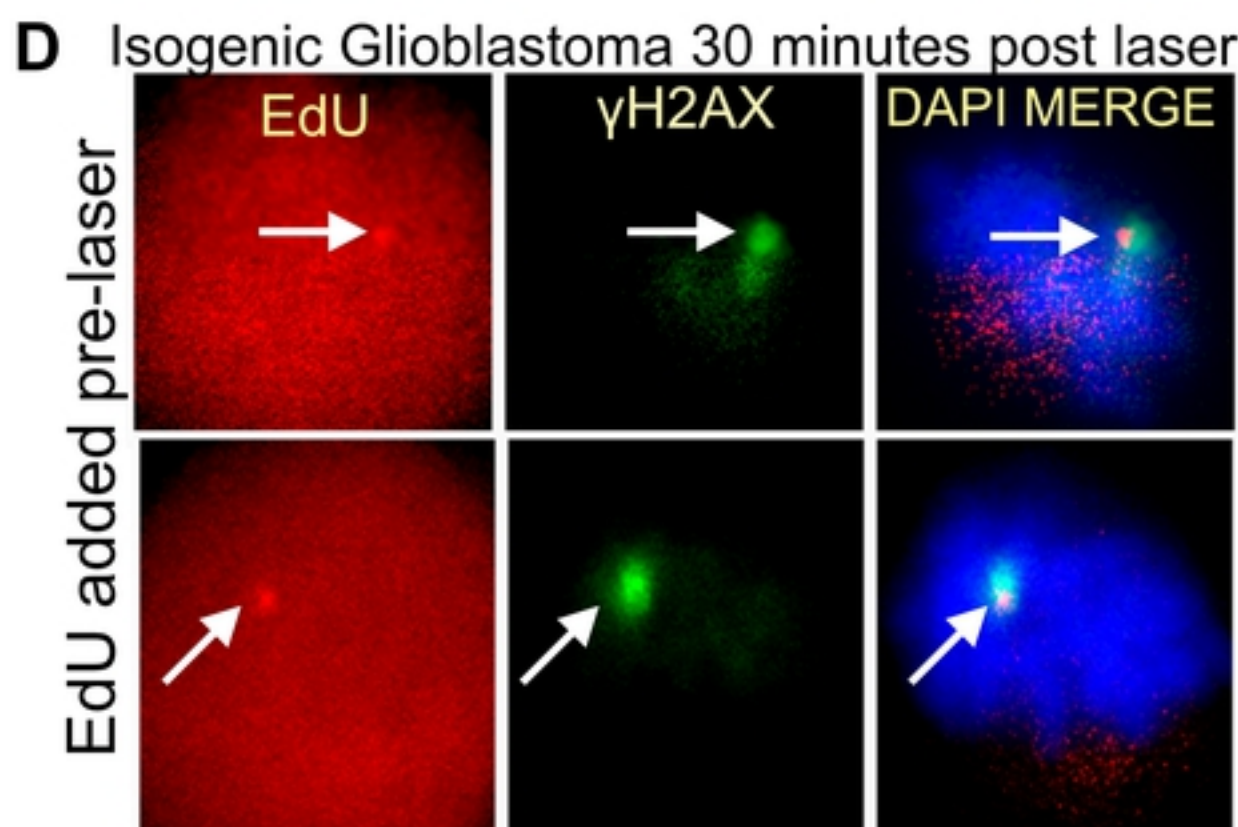

Fig3

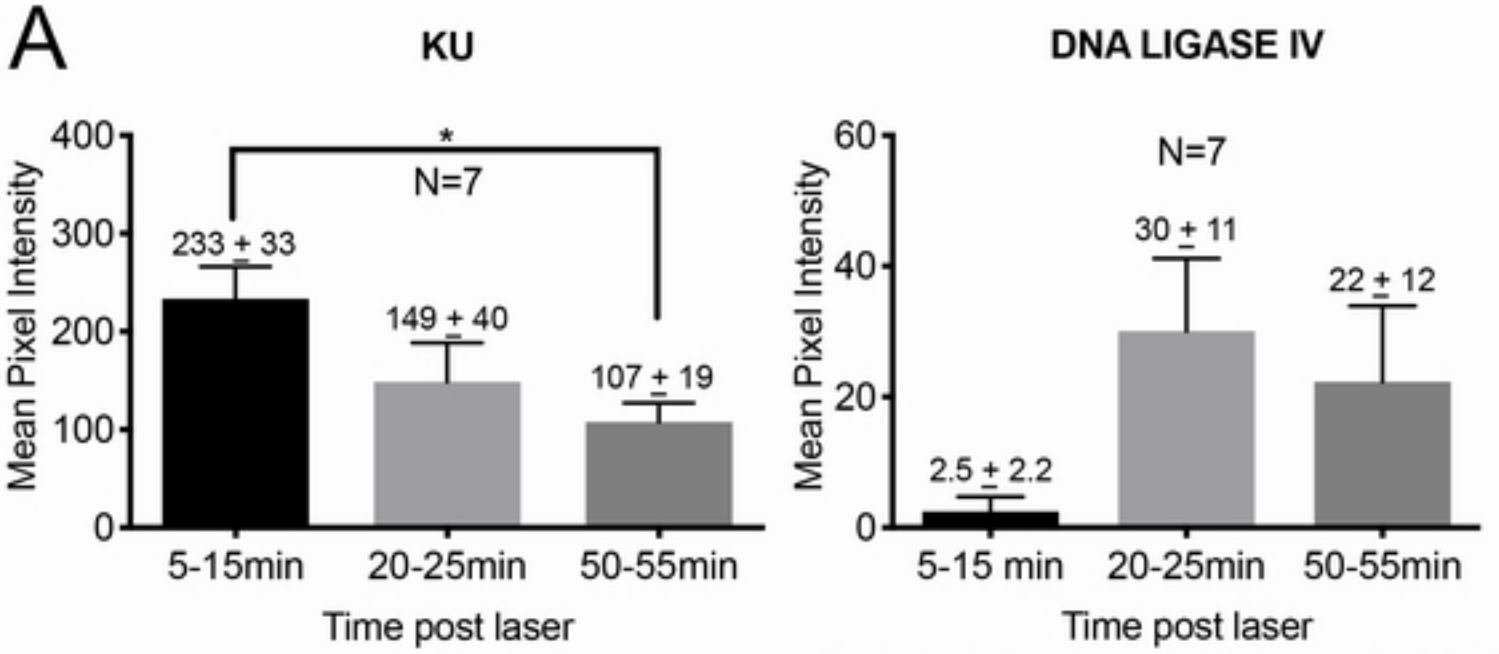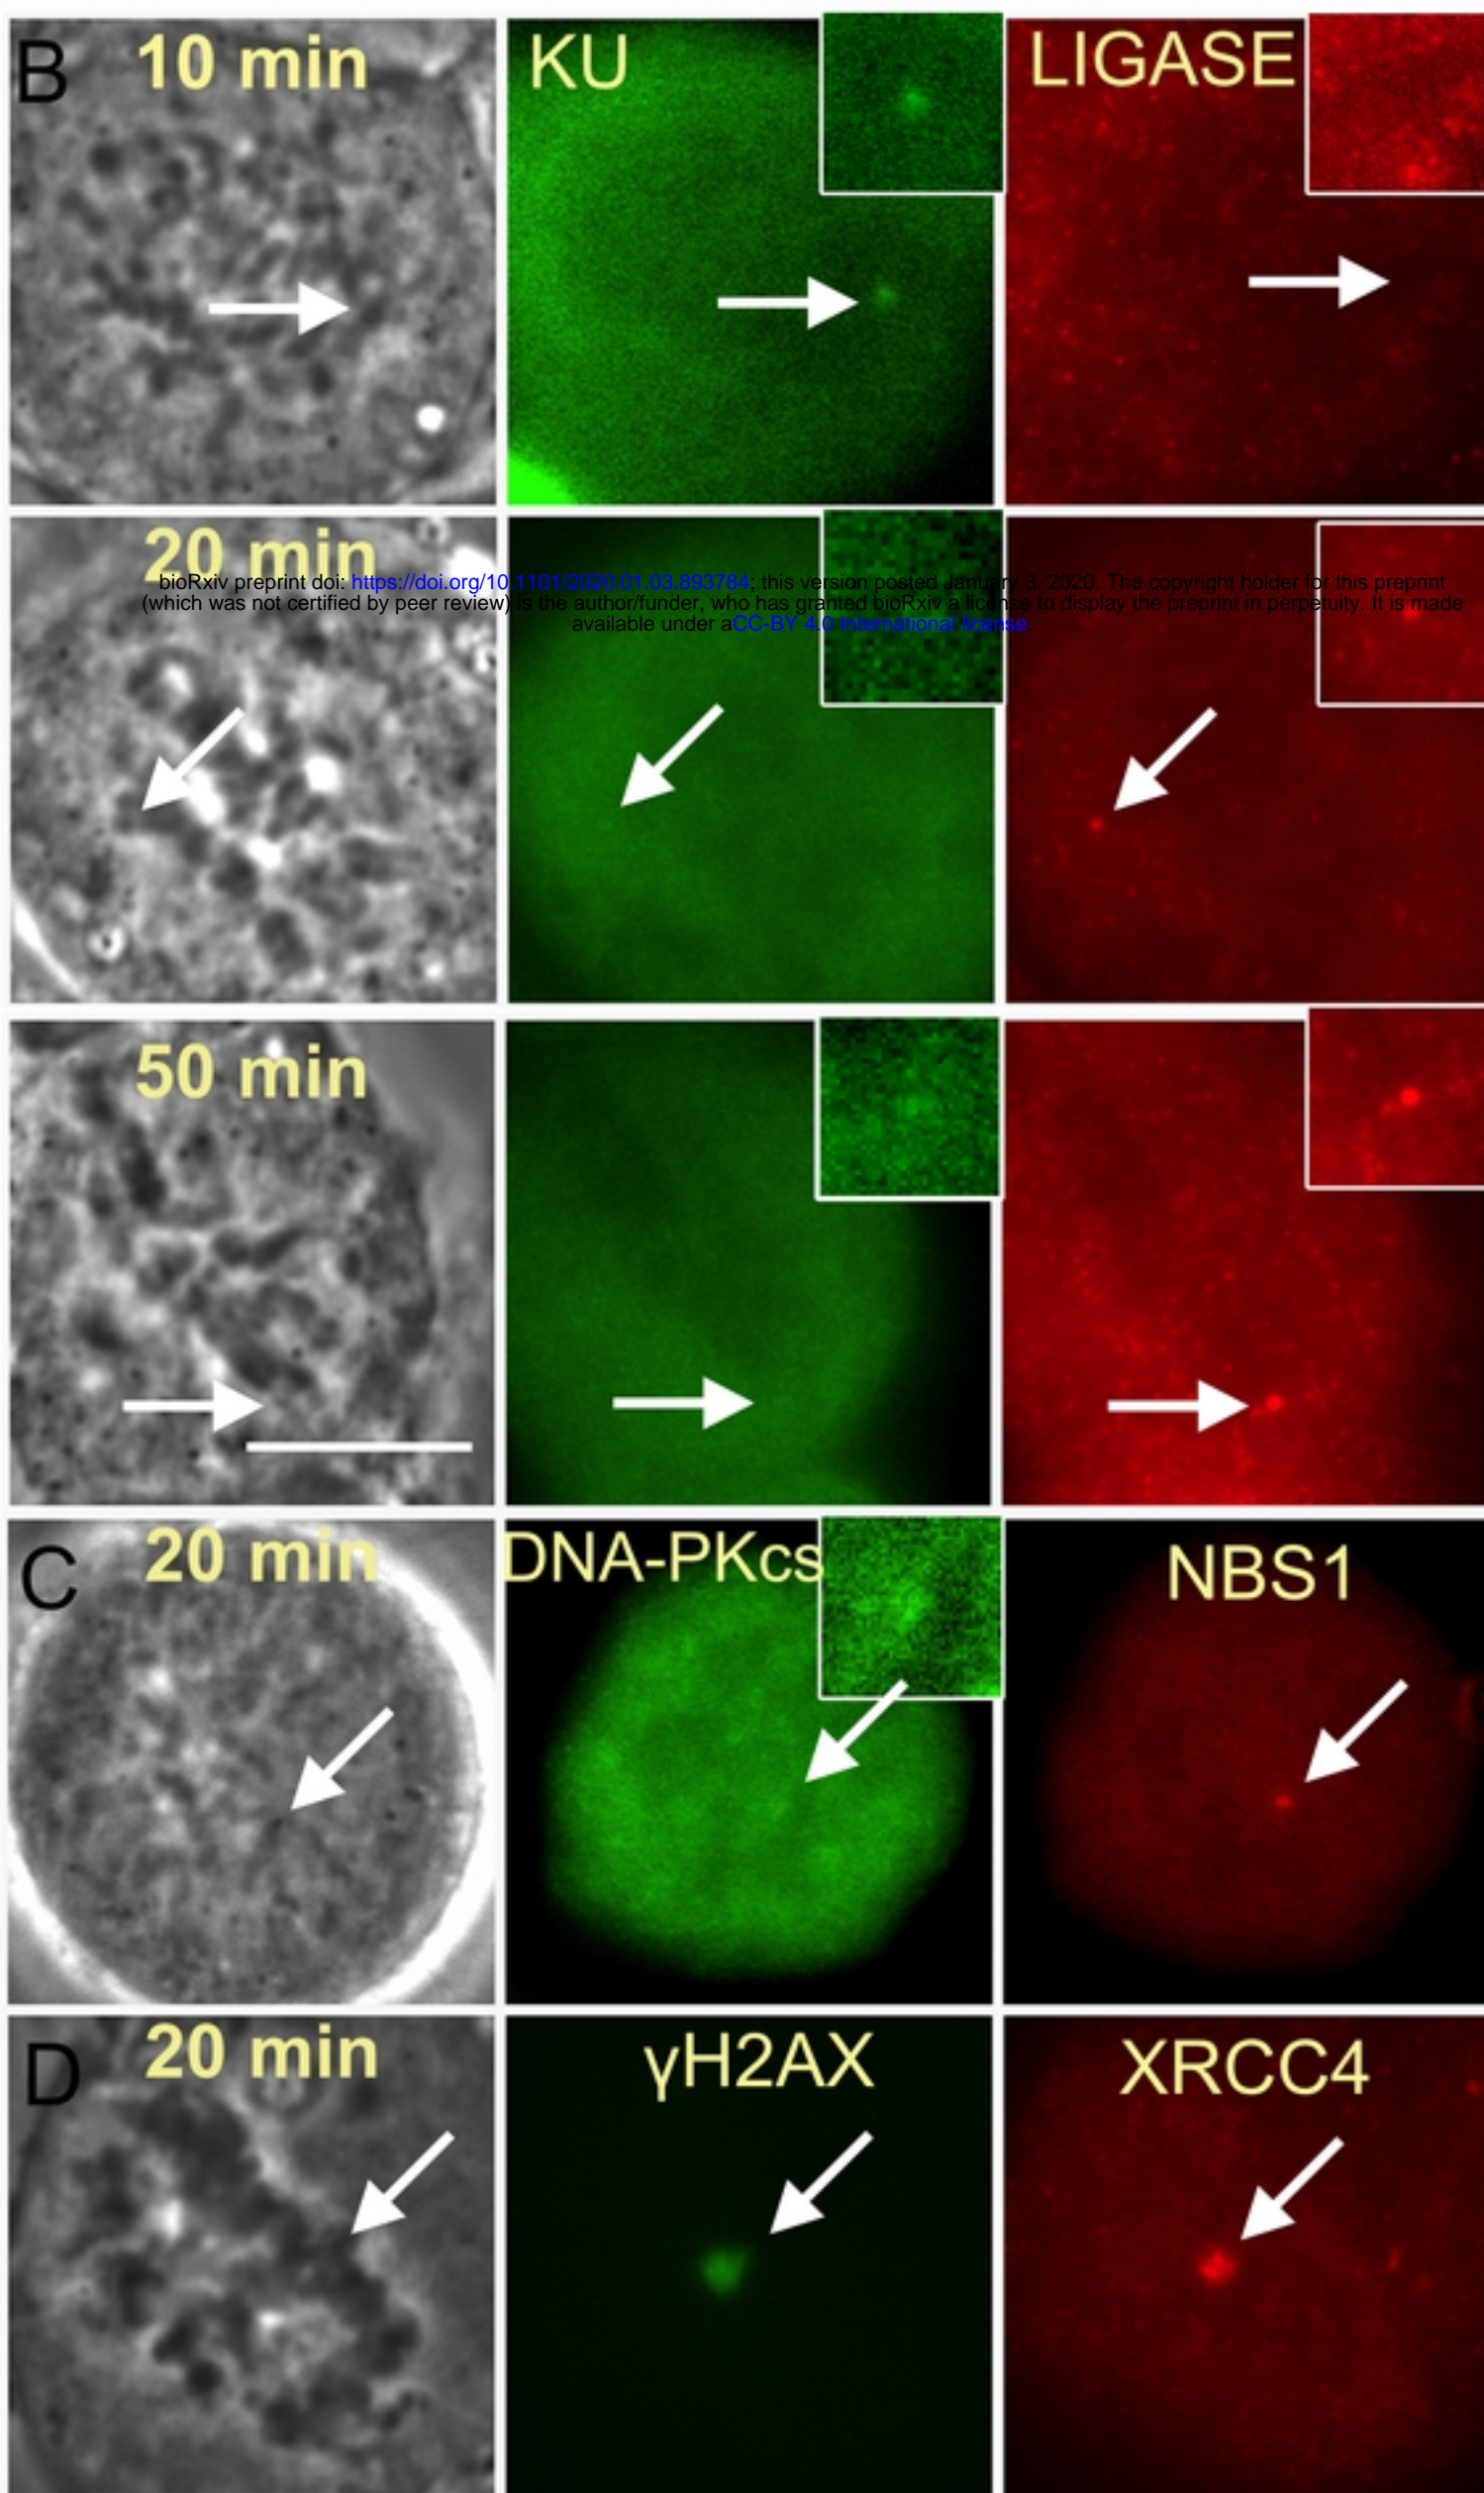

**Fig4**

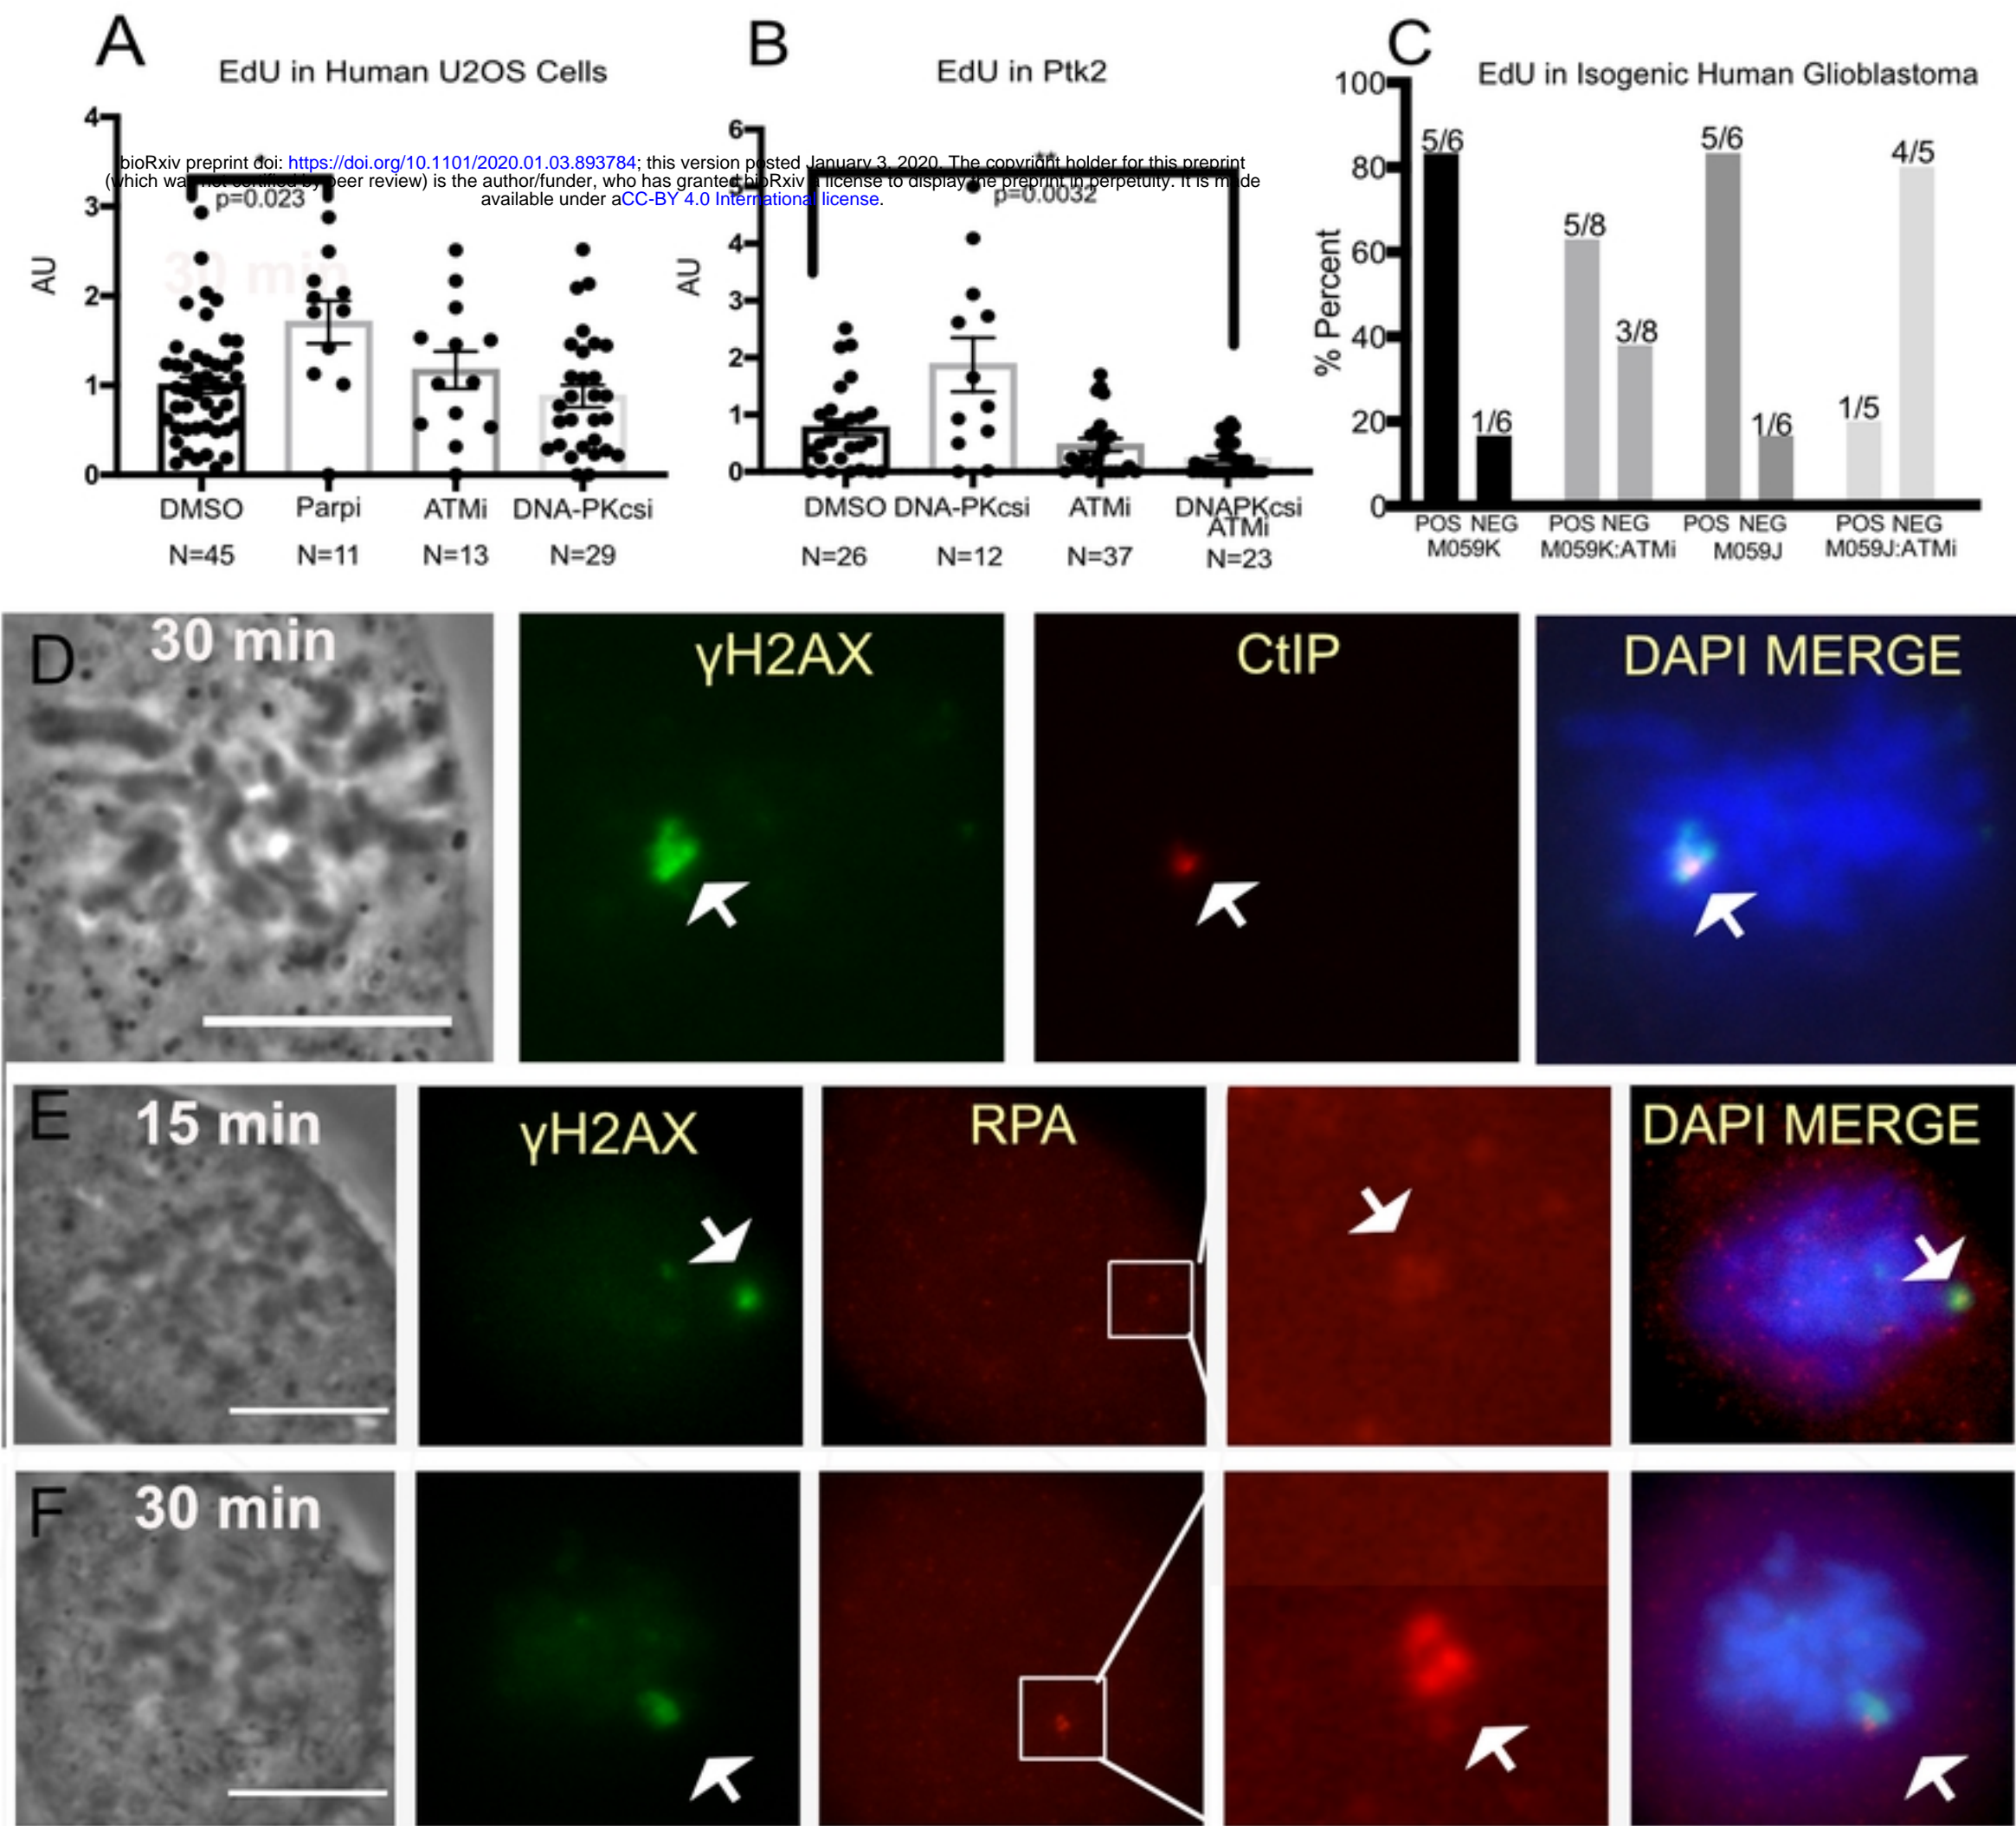

Fig5

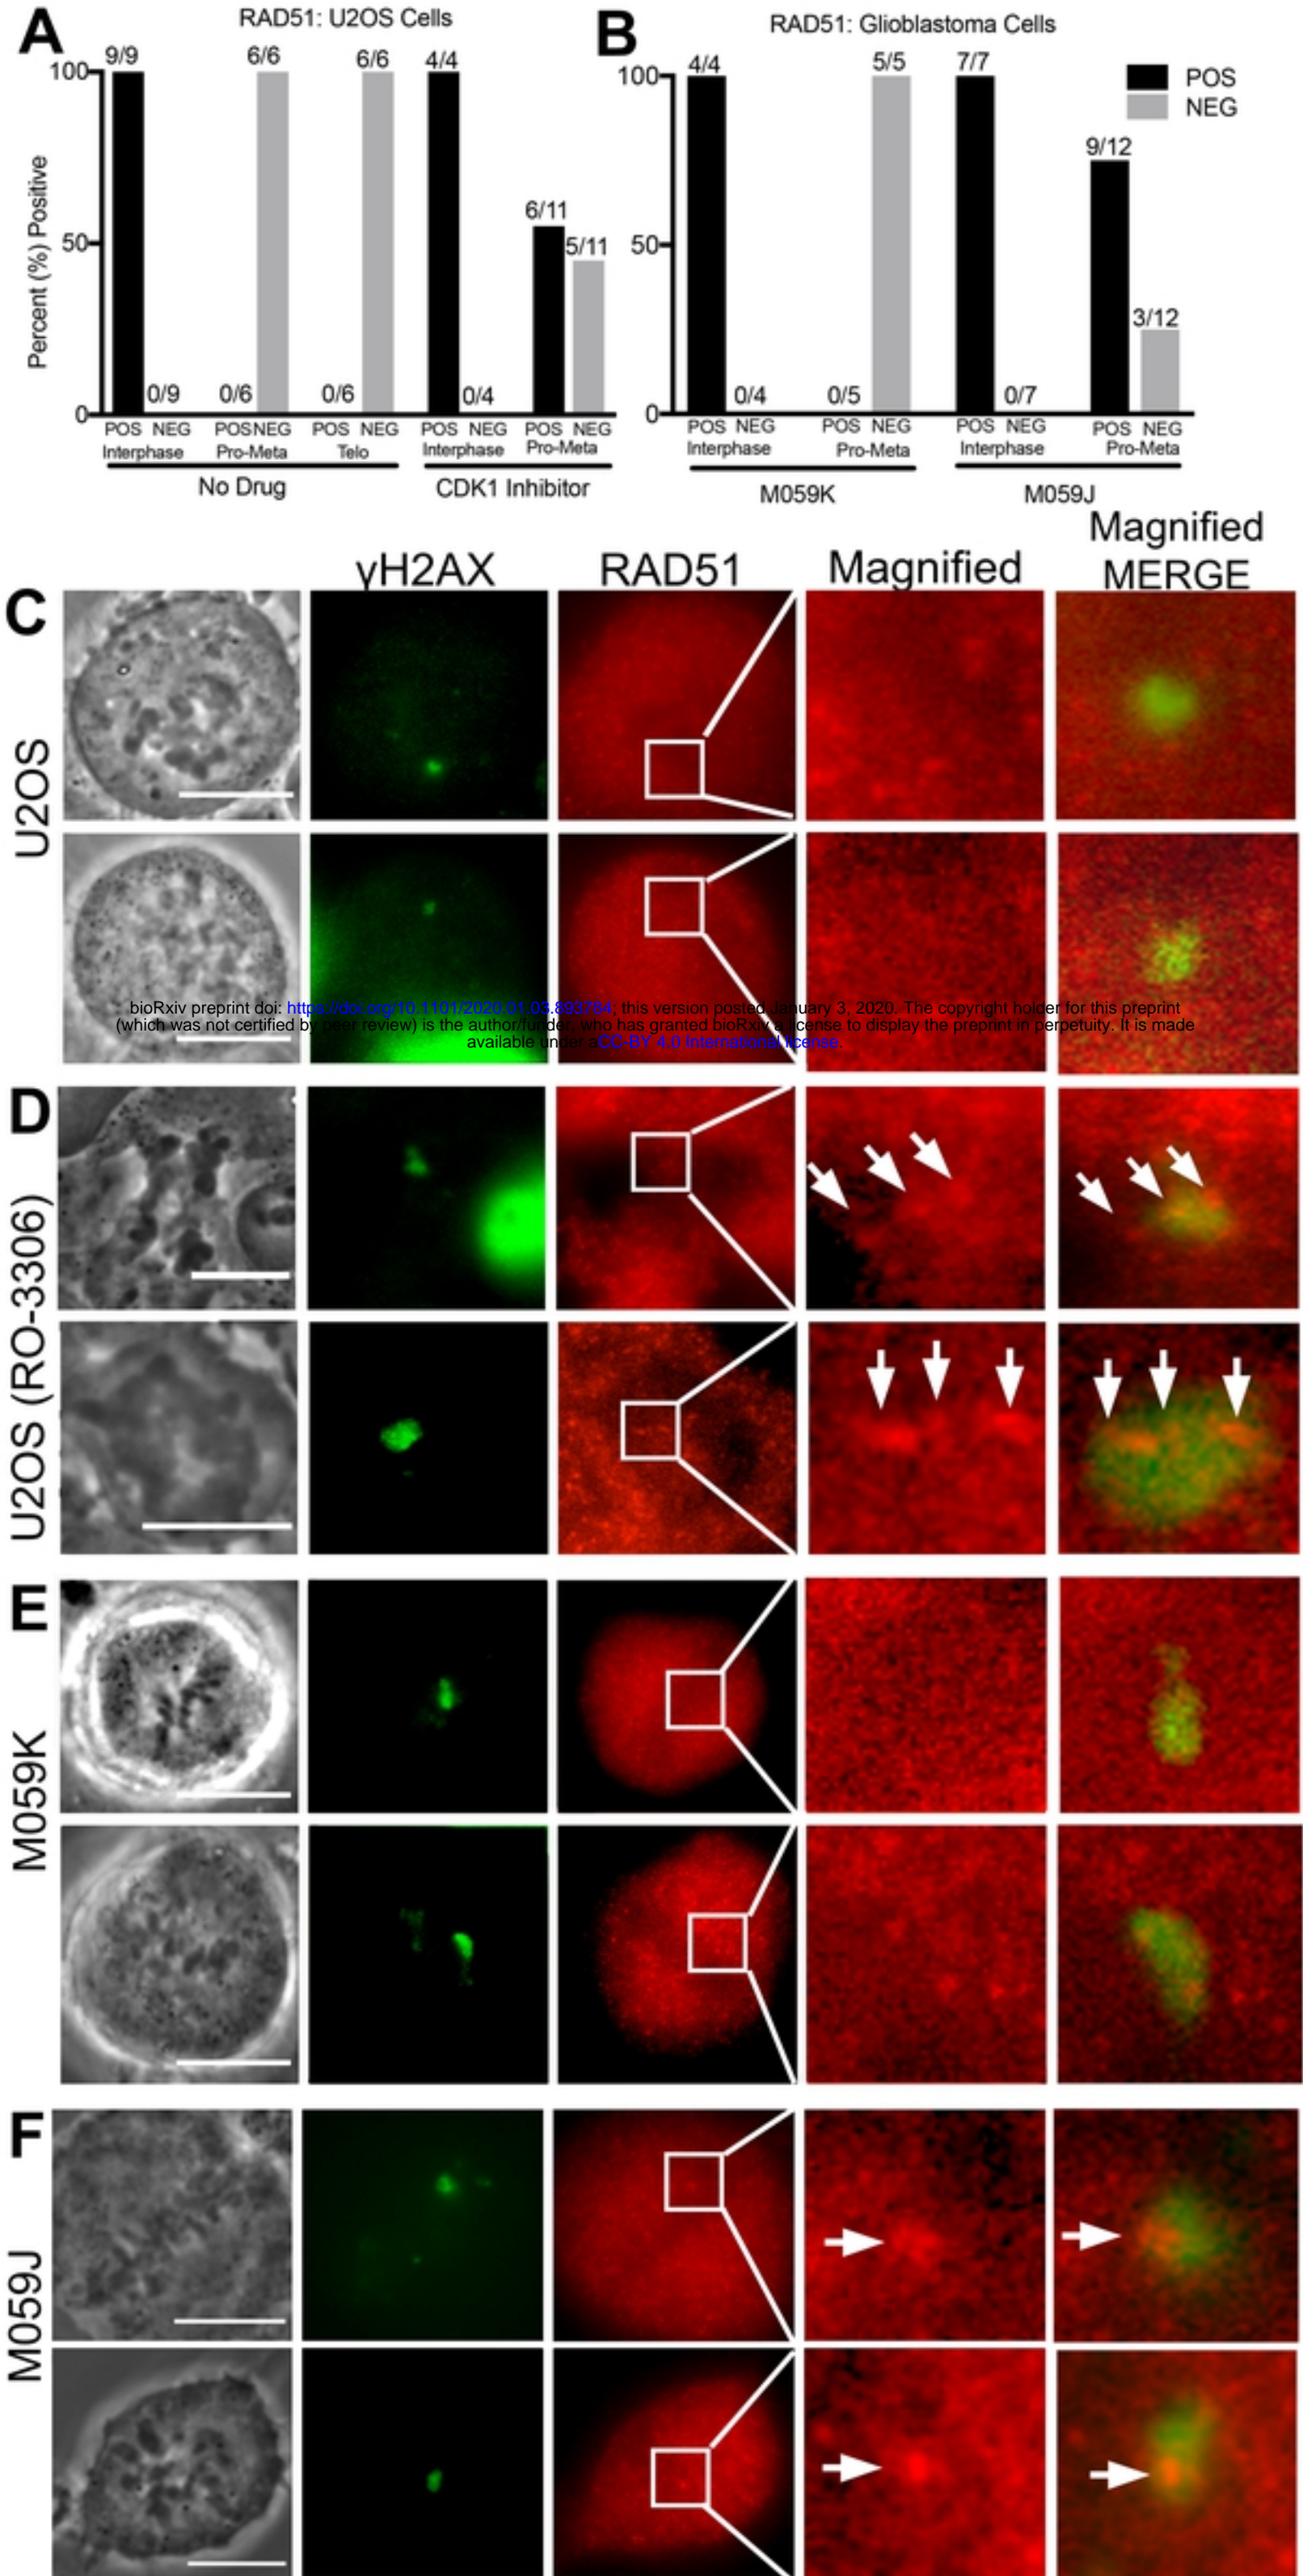

Fig6

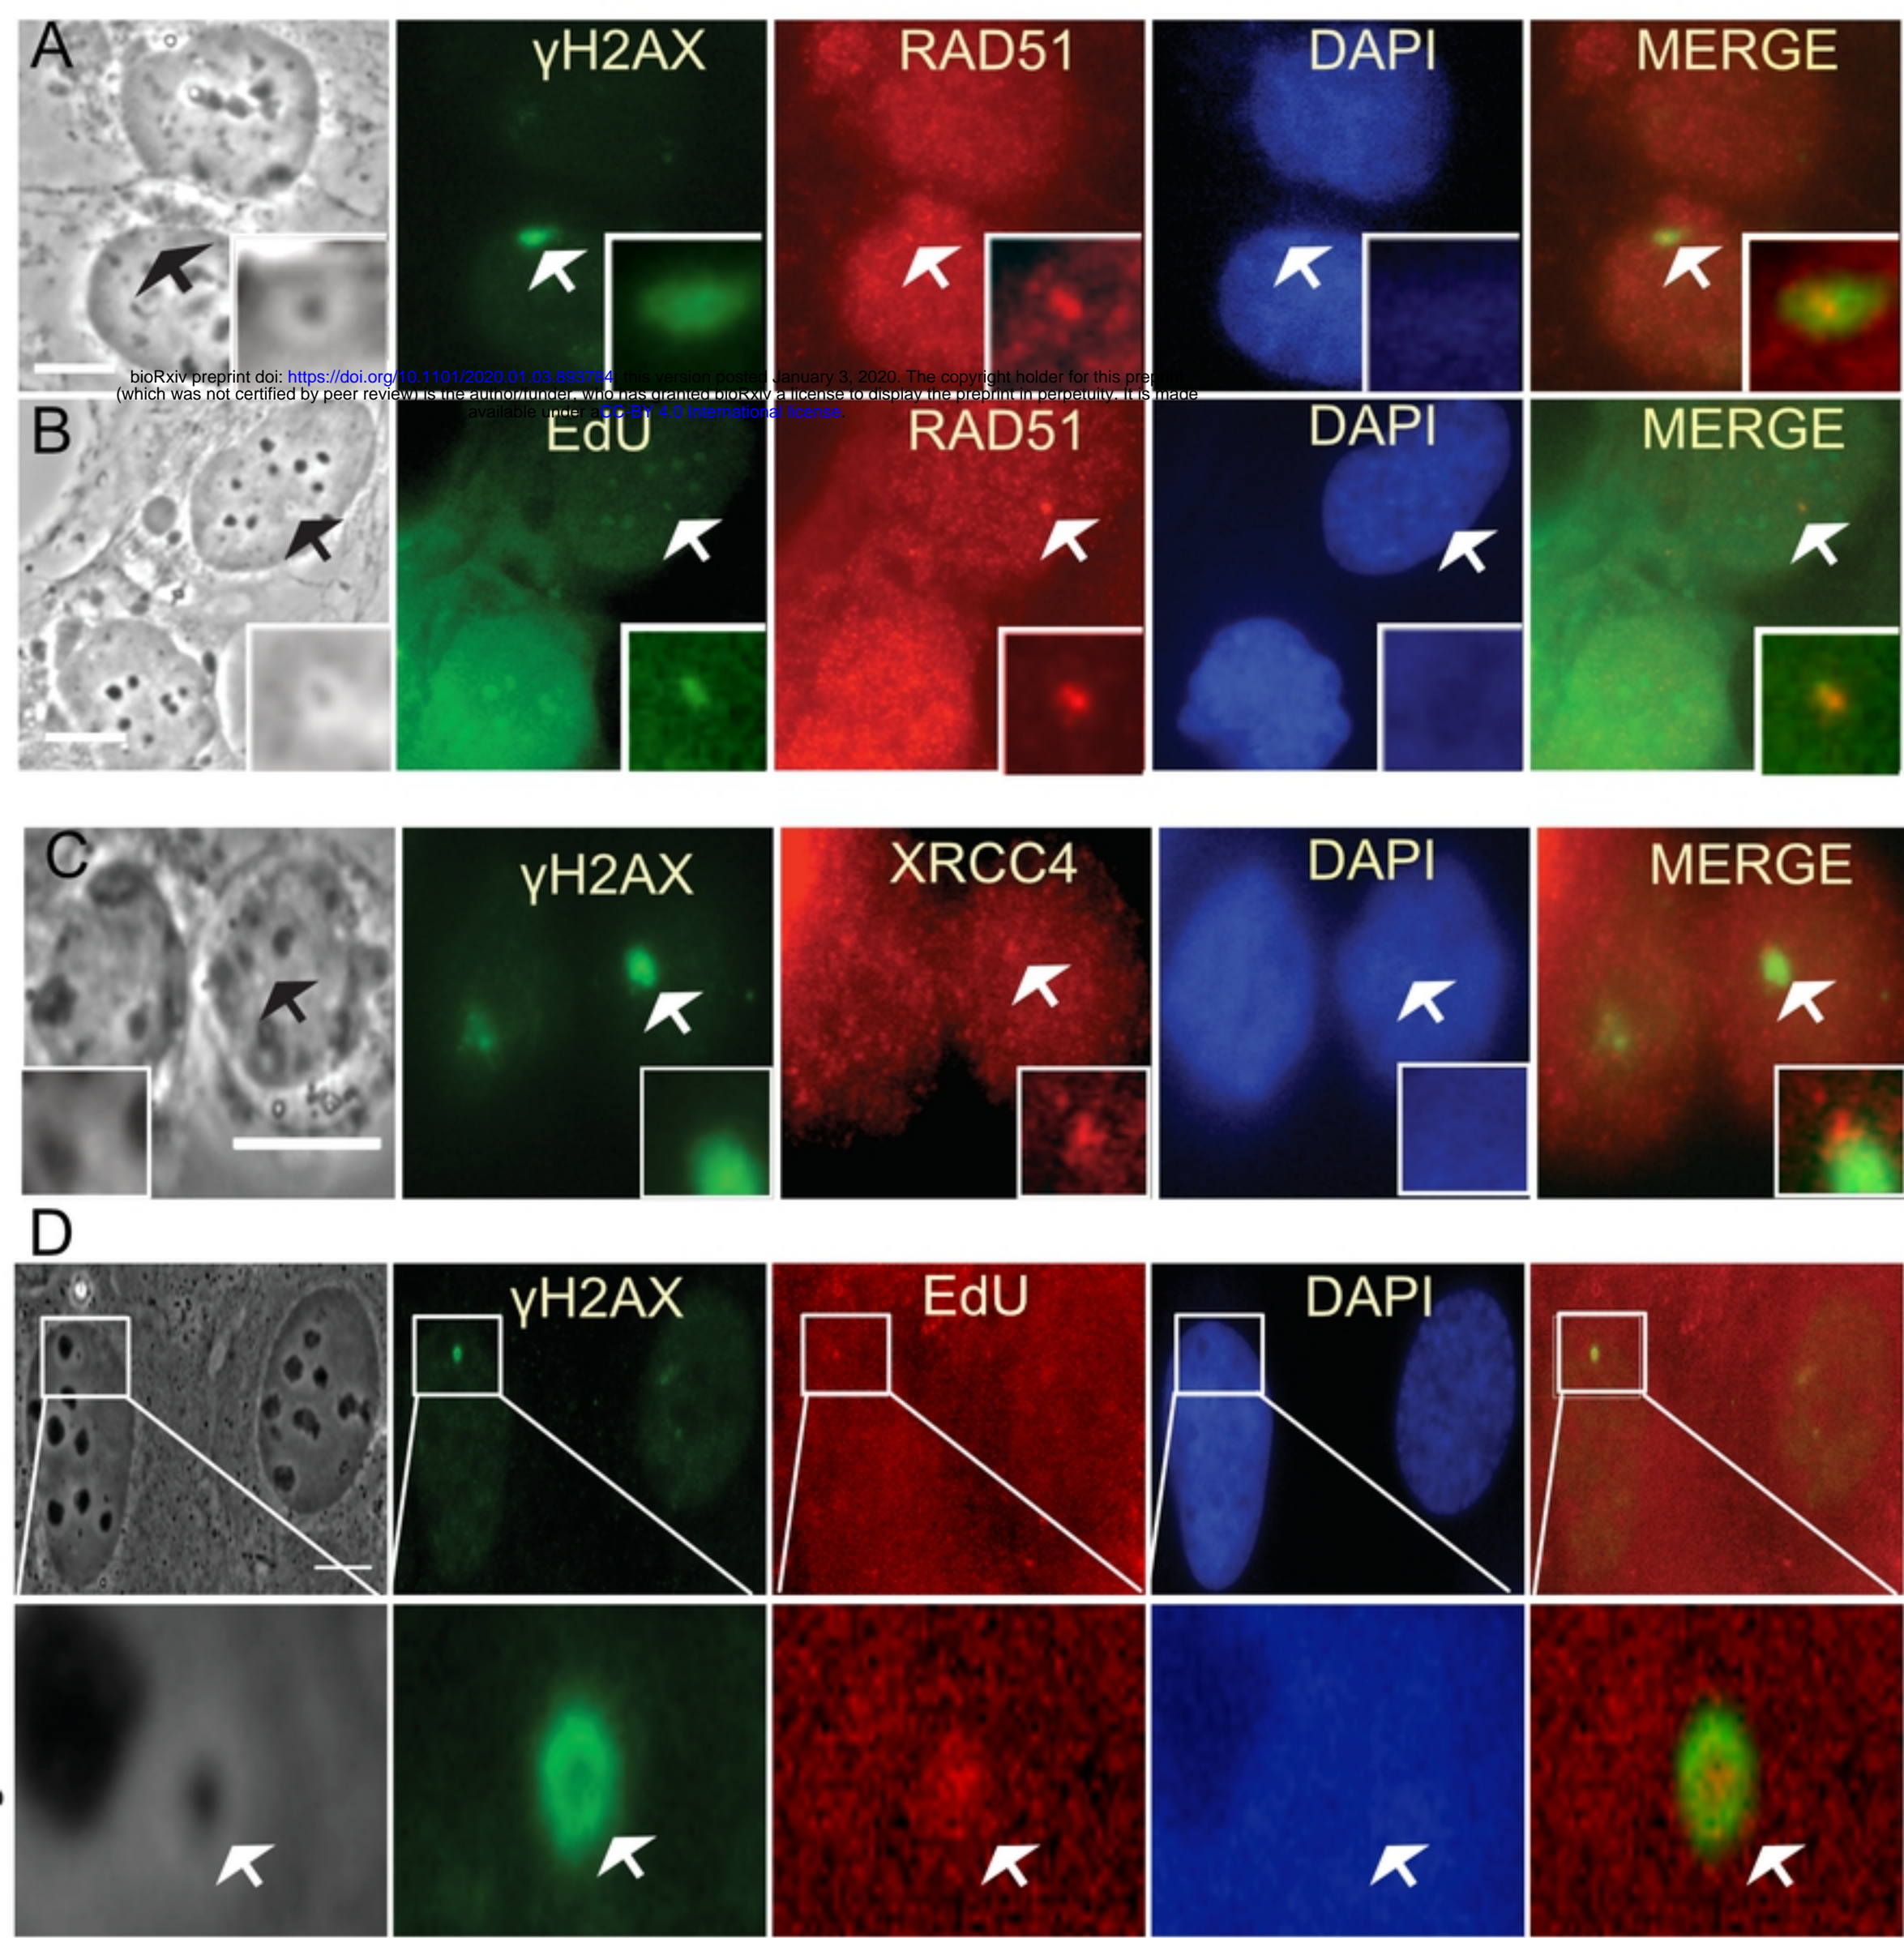

Fig8

**A****Fate of Cells Damaged in Metaphase**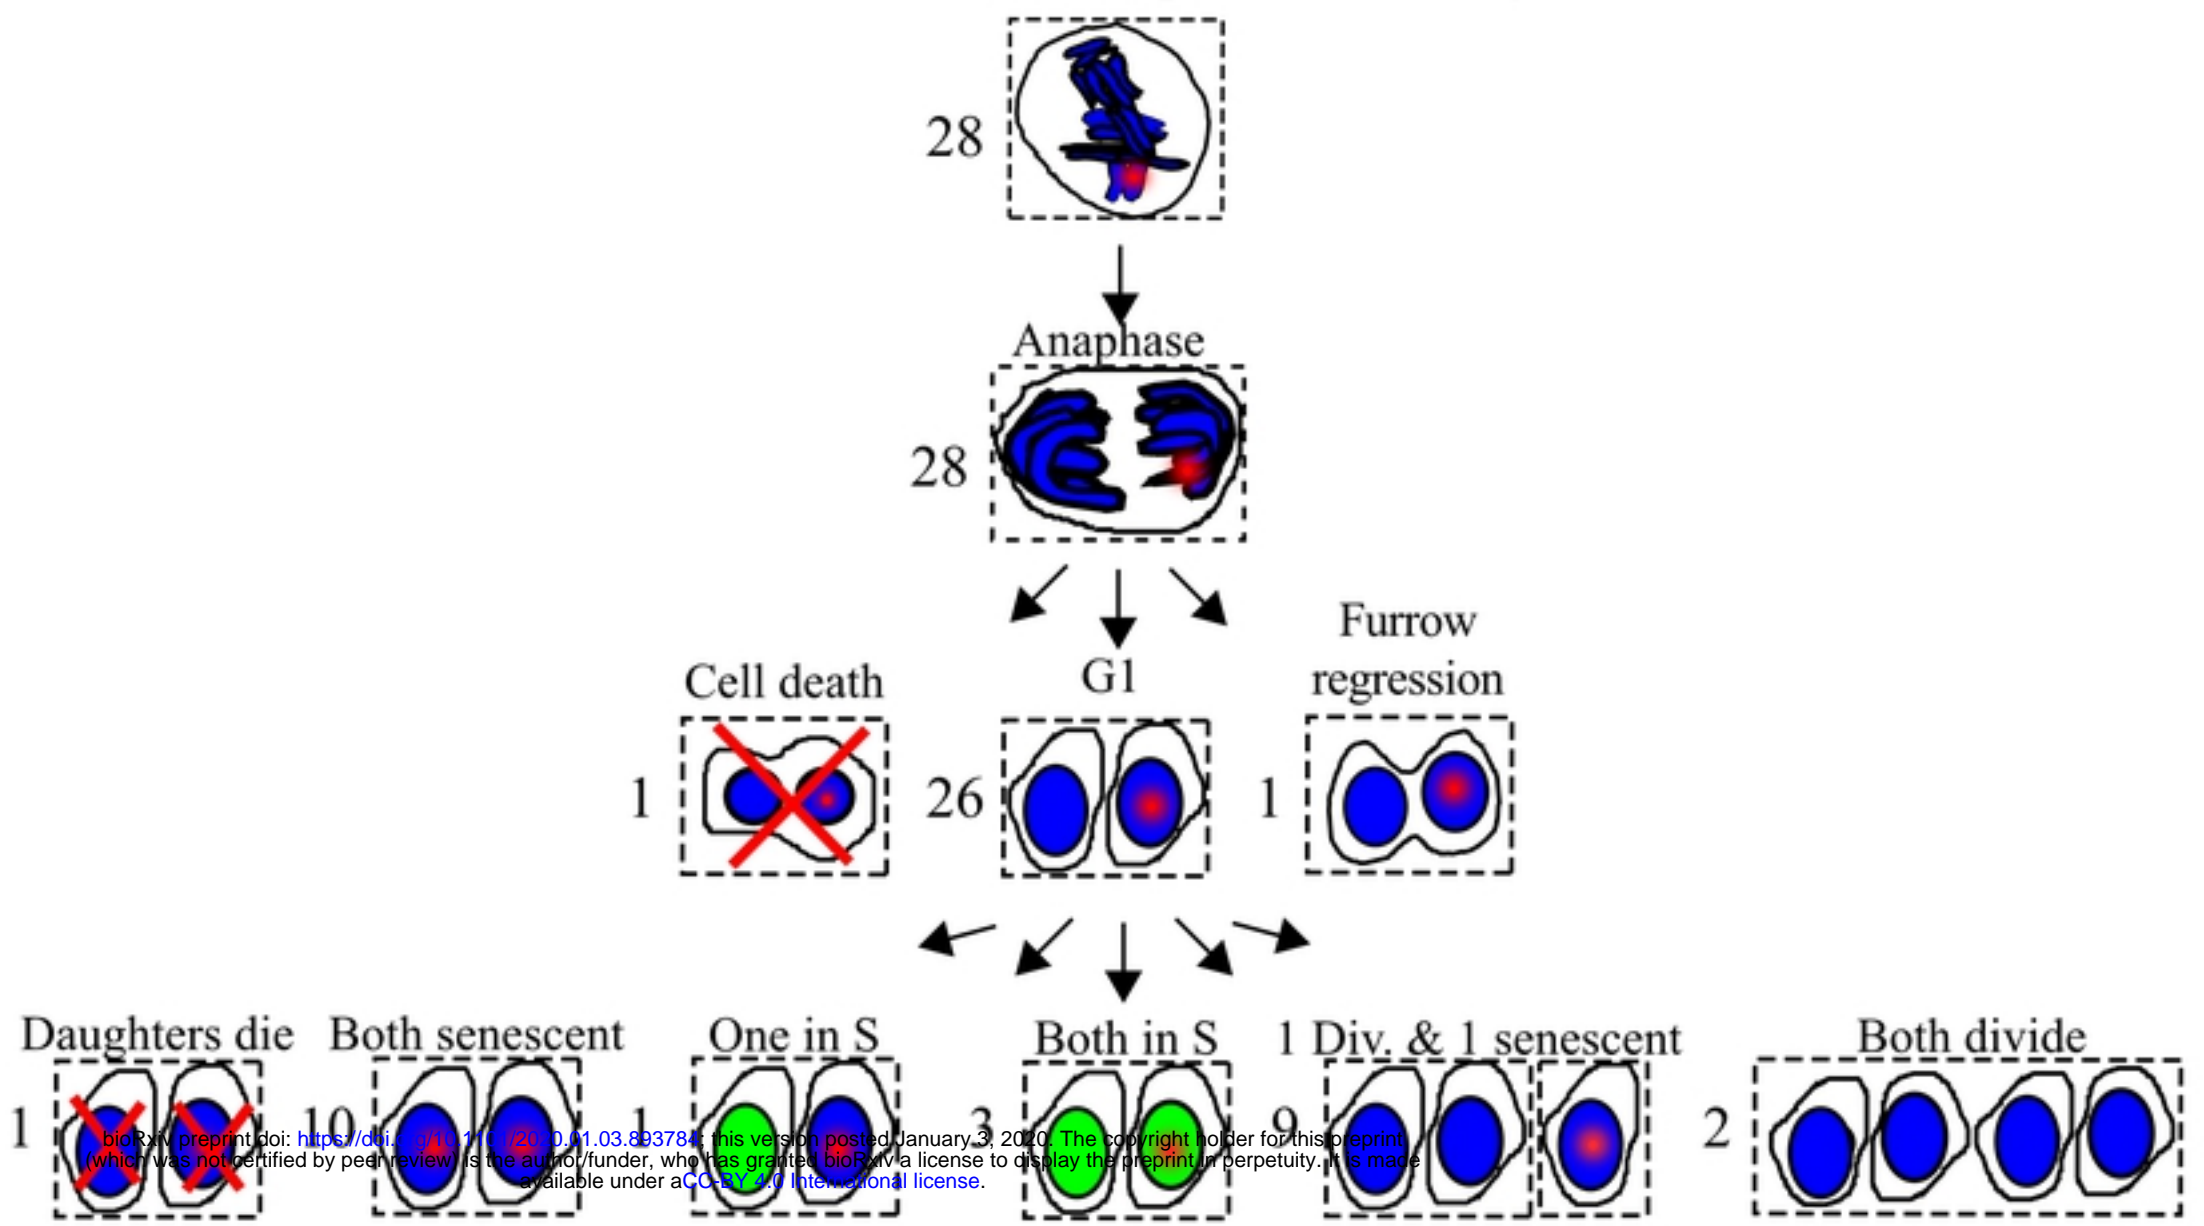**B****Fate of Cells Damaged in Anaphase**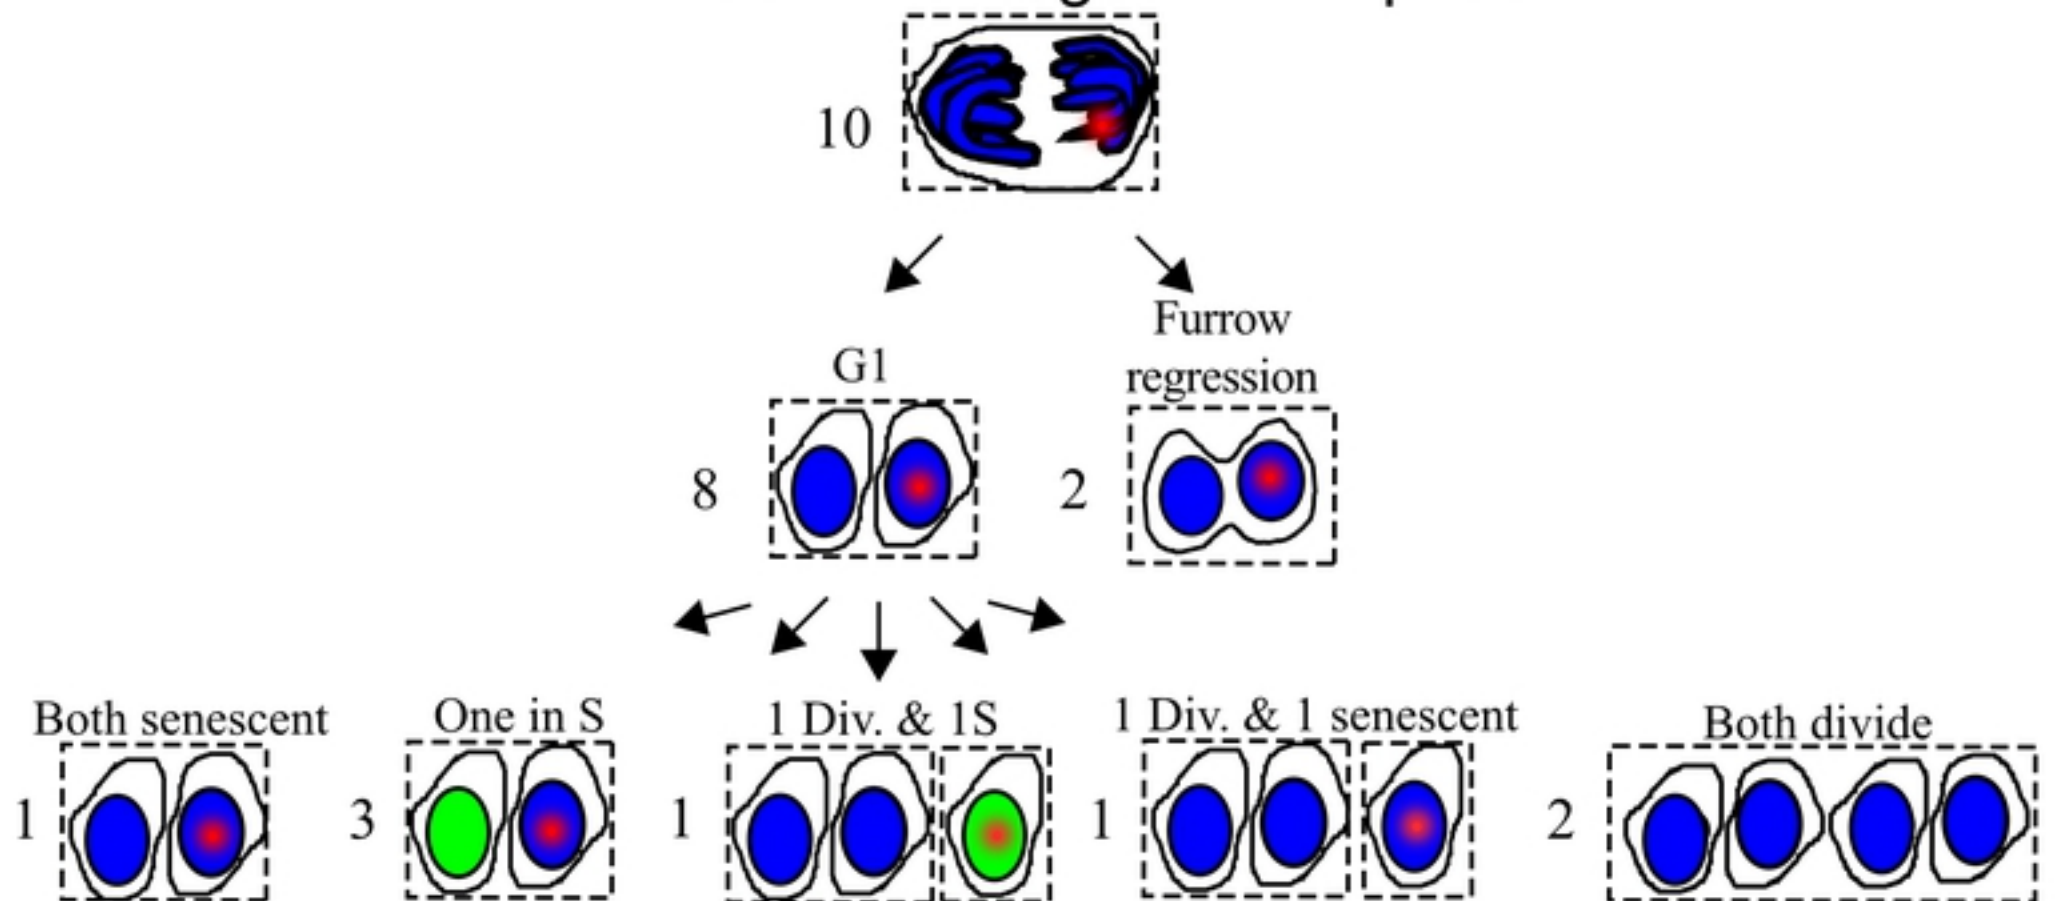**C****Fate of Cells Damaged in G1**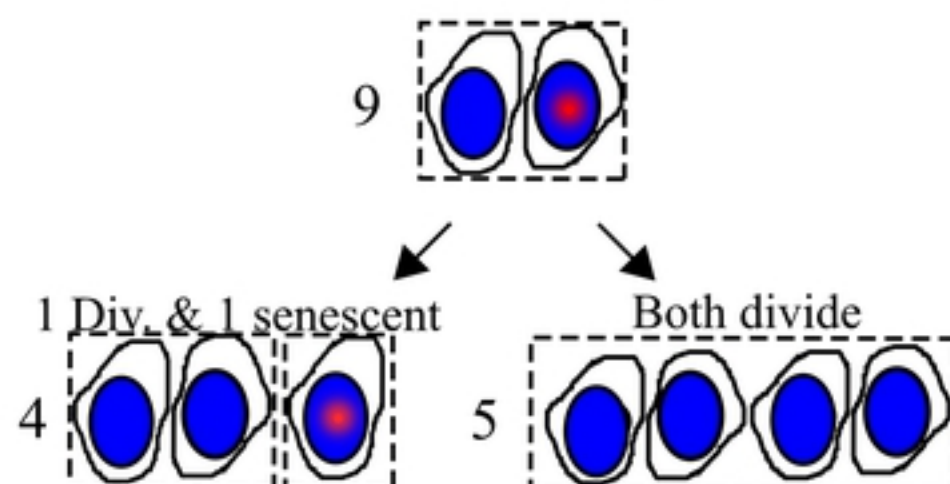



# Damaged in Metaphase

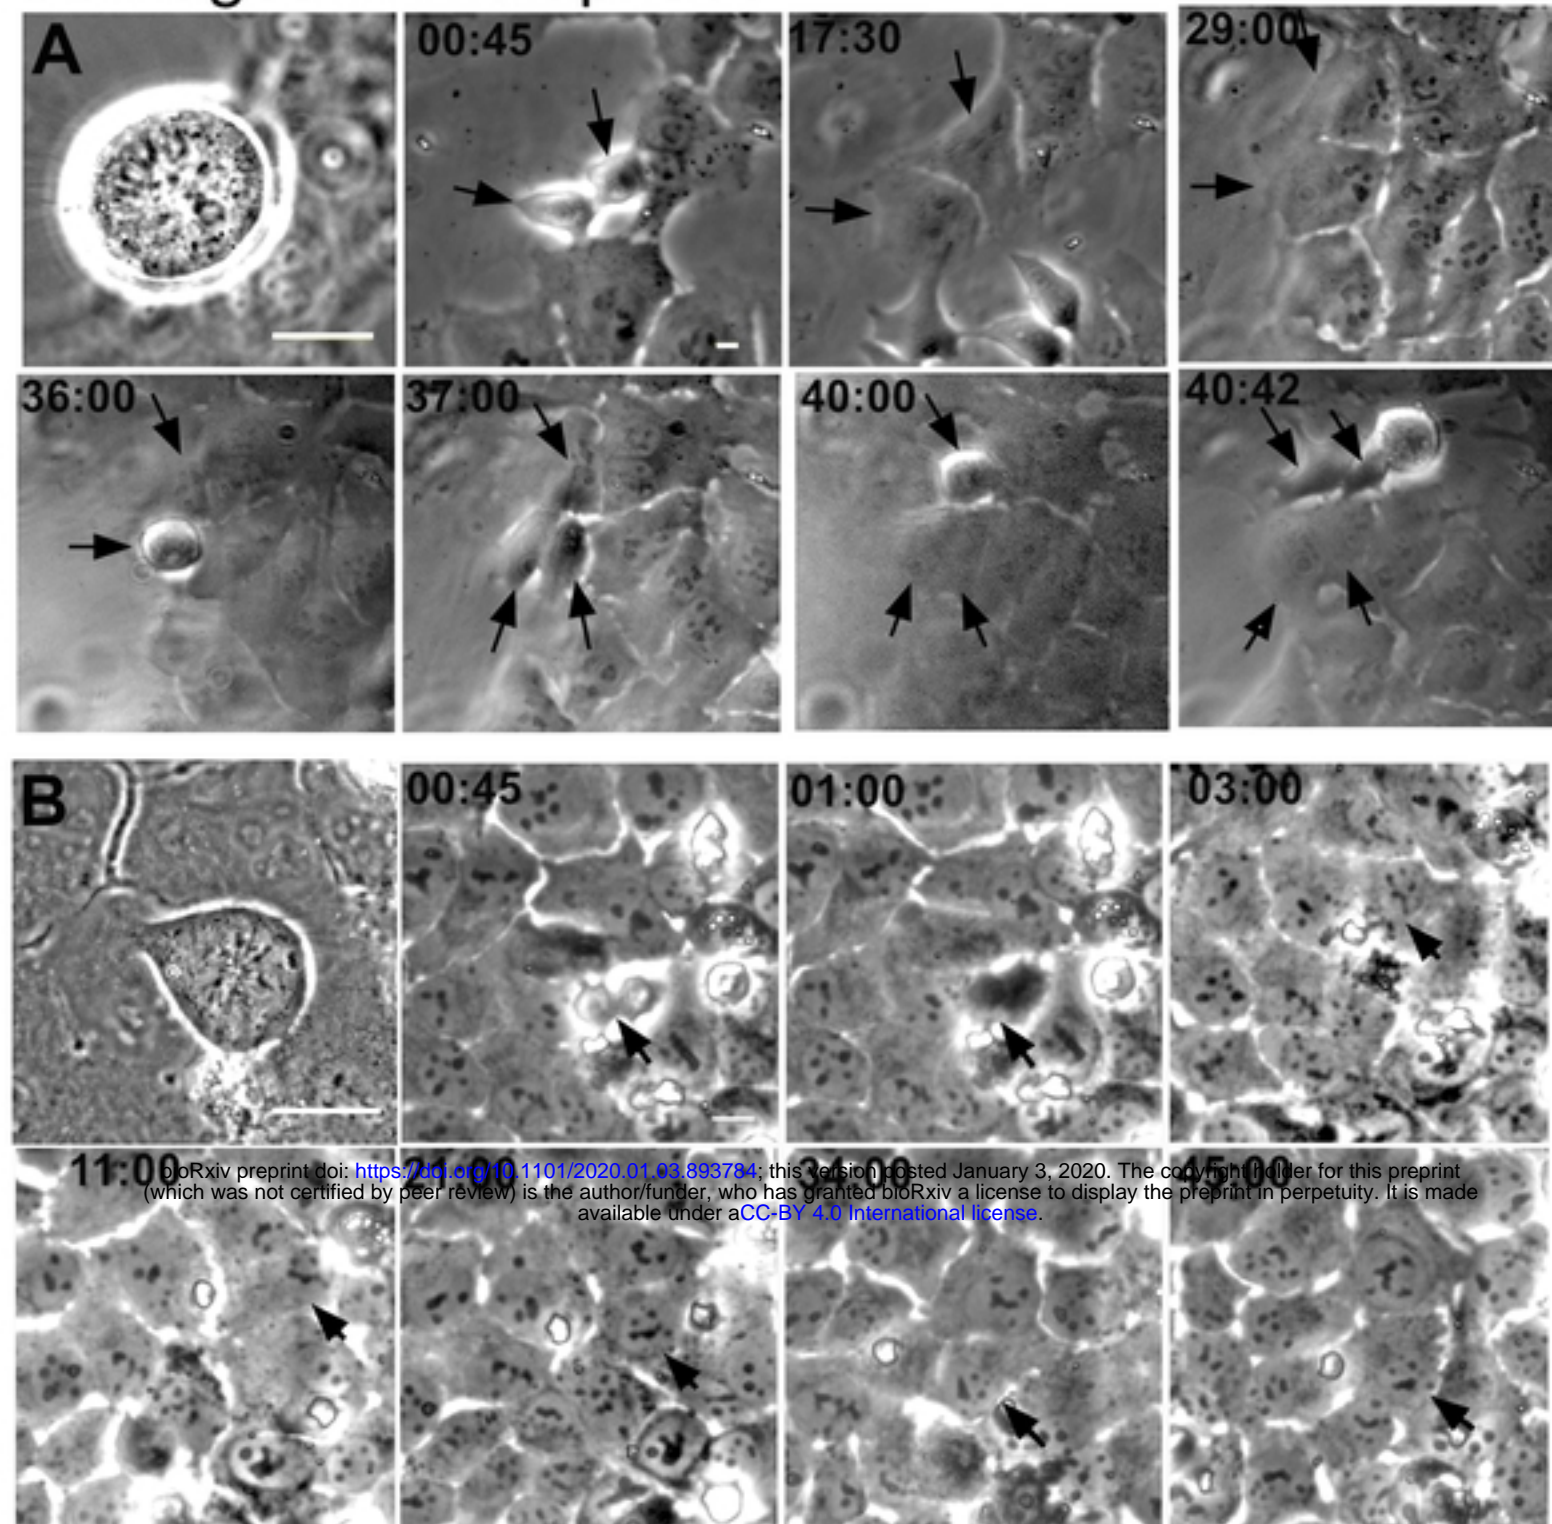

# Damaged in Anaphase

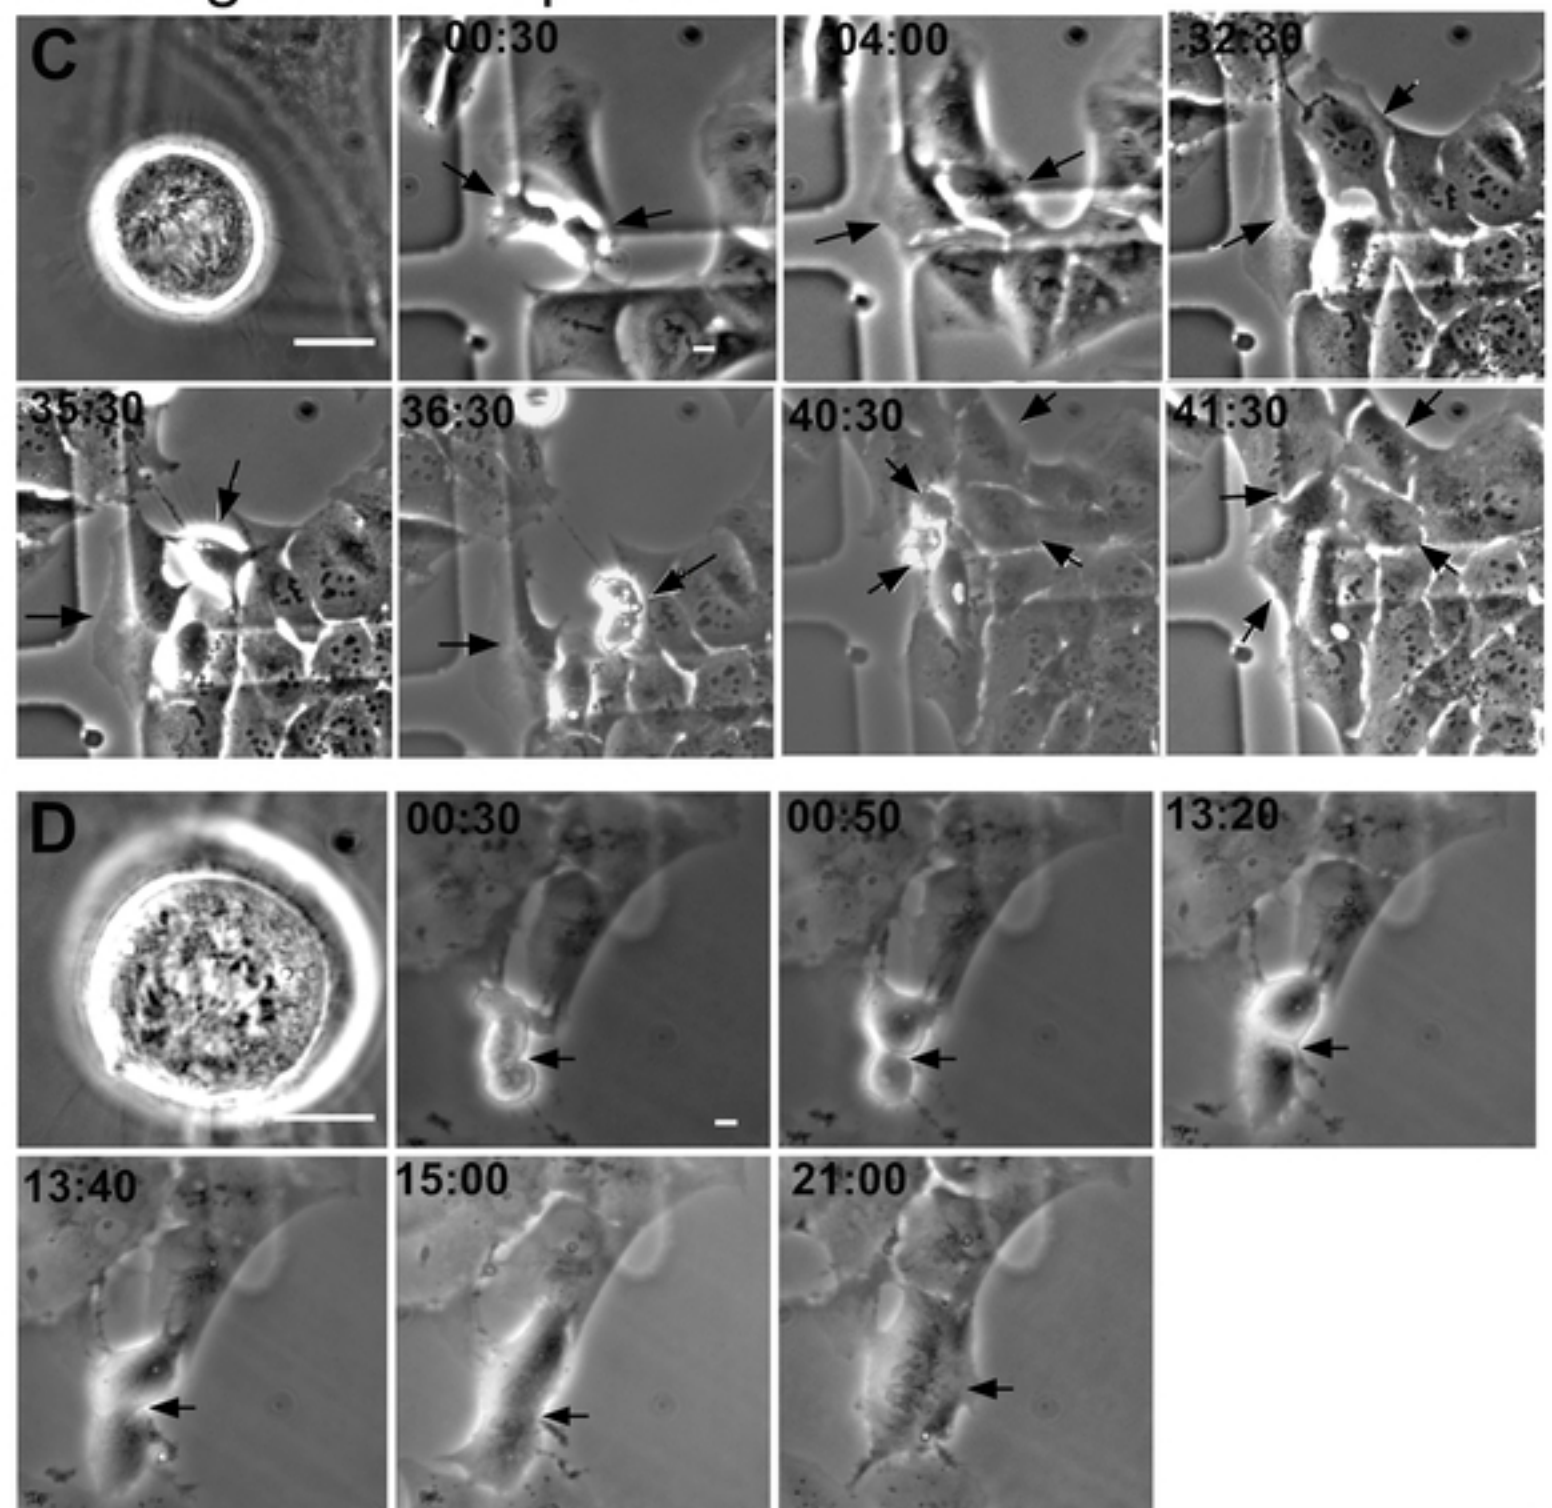

Fig10

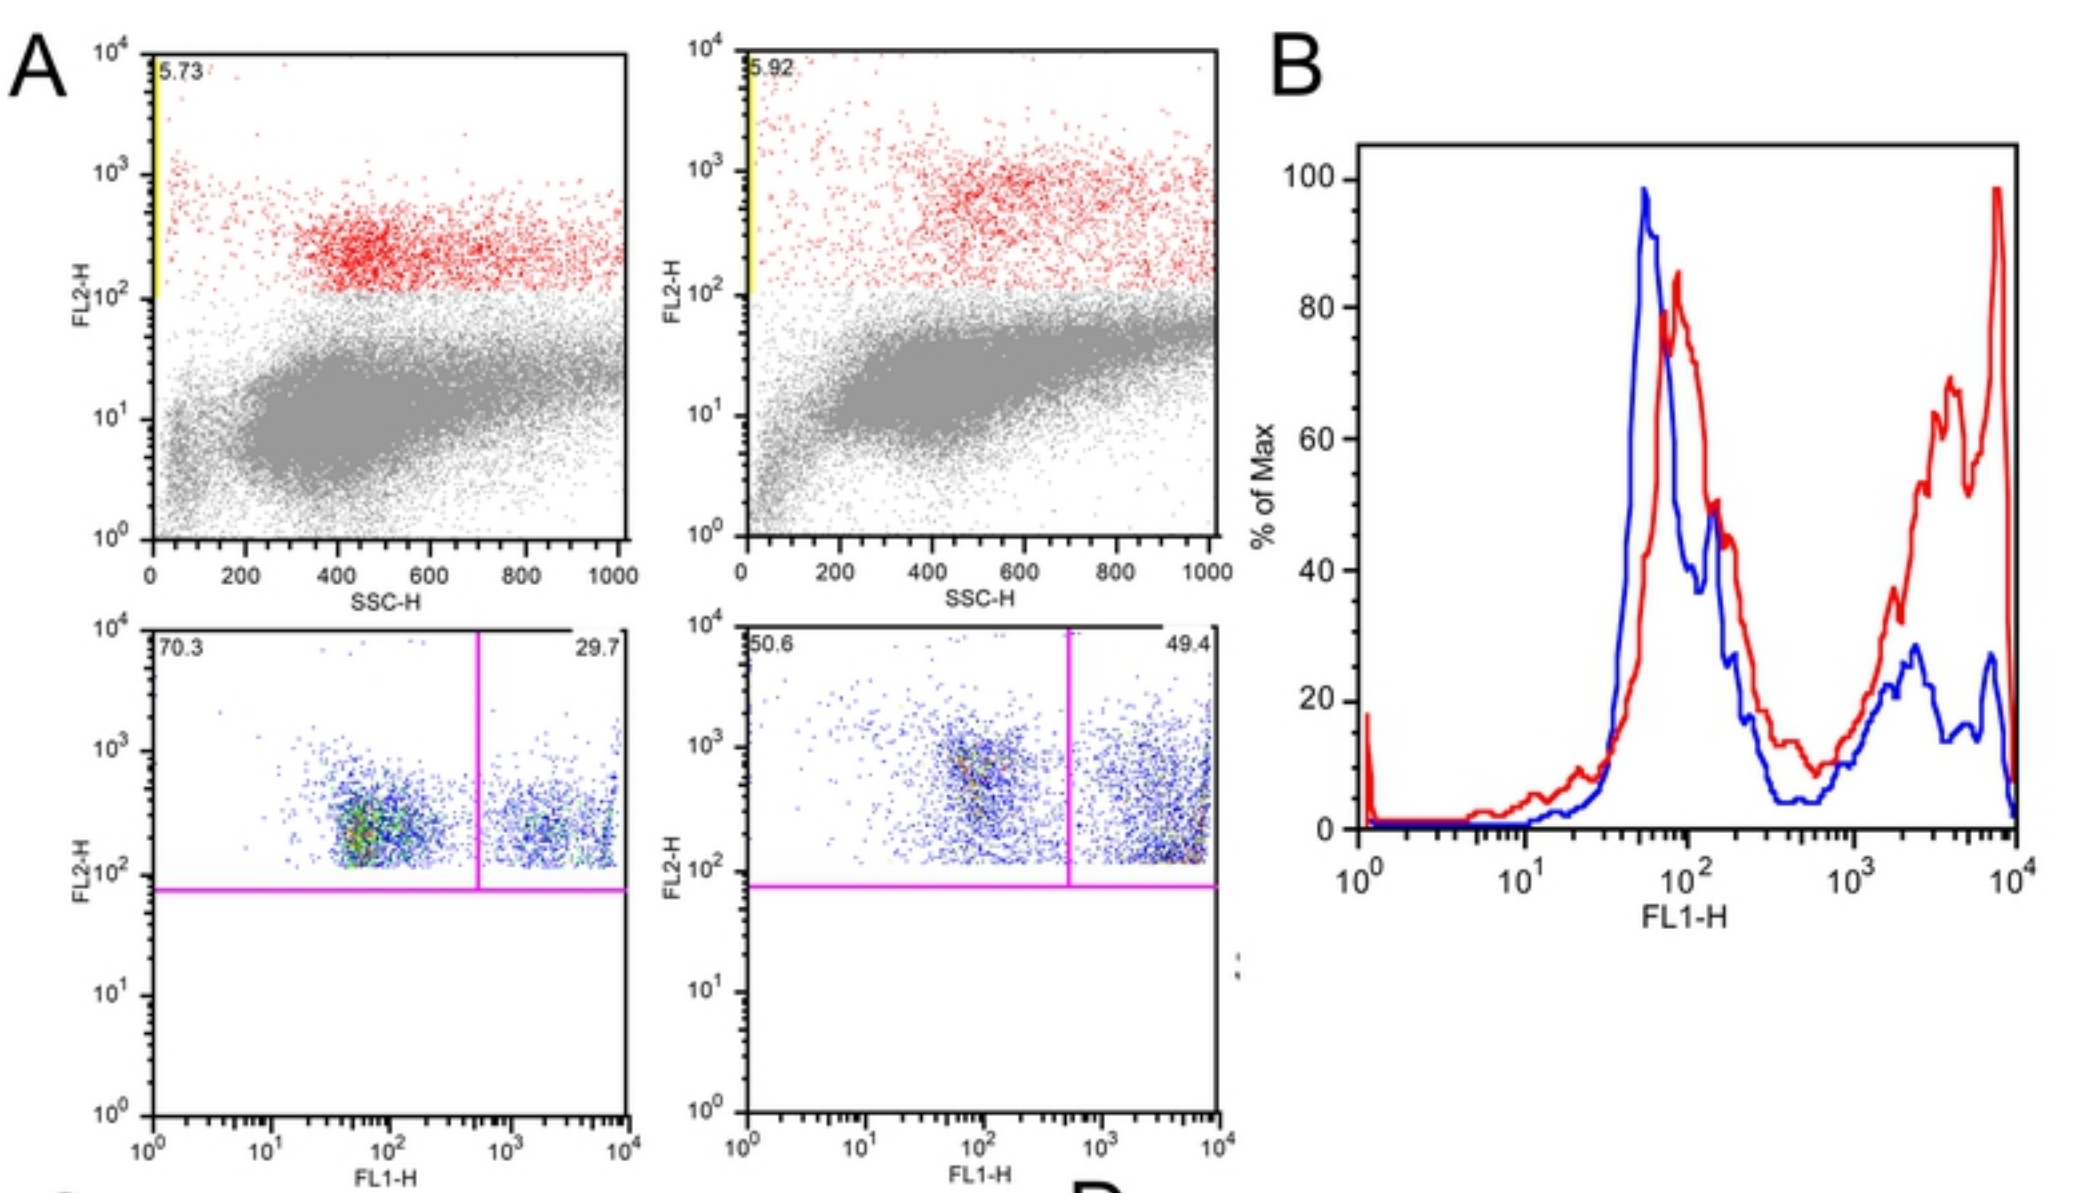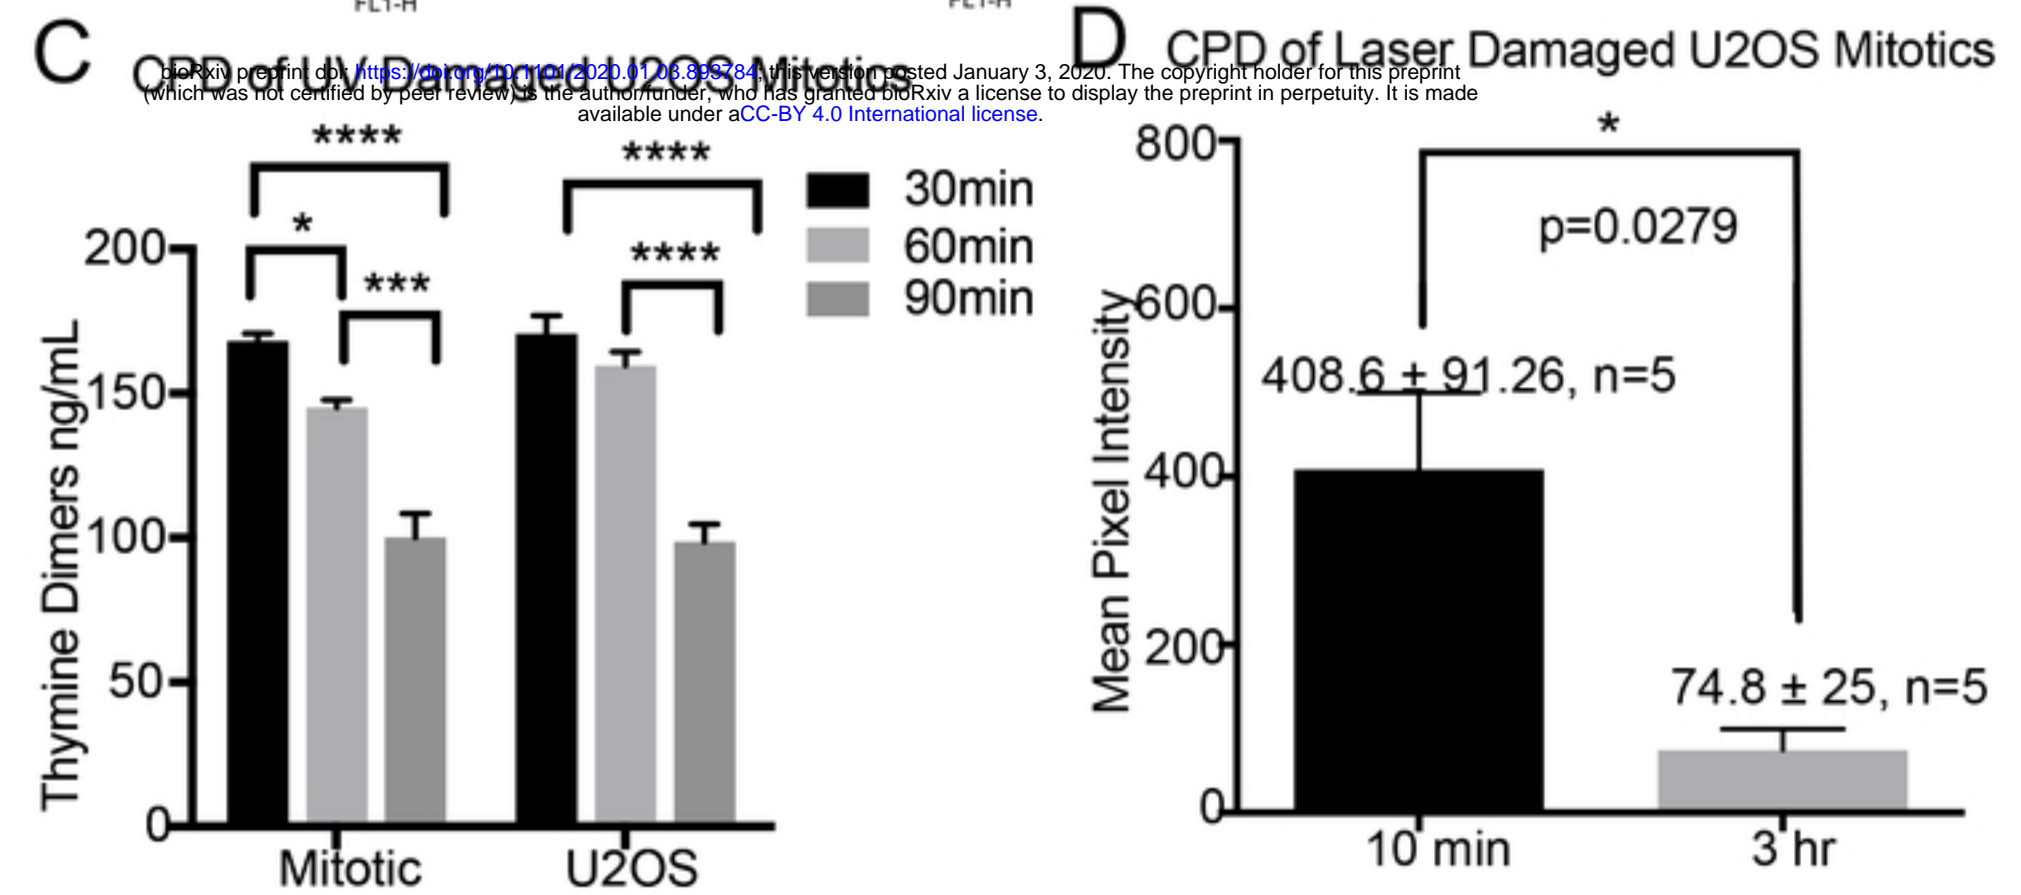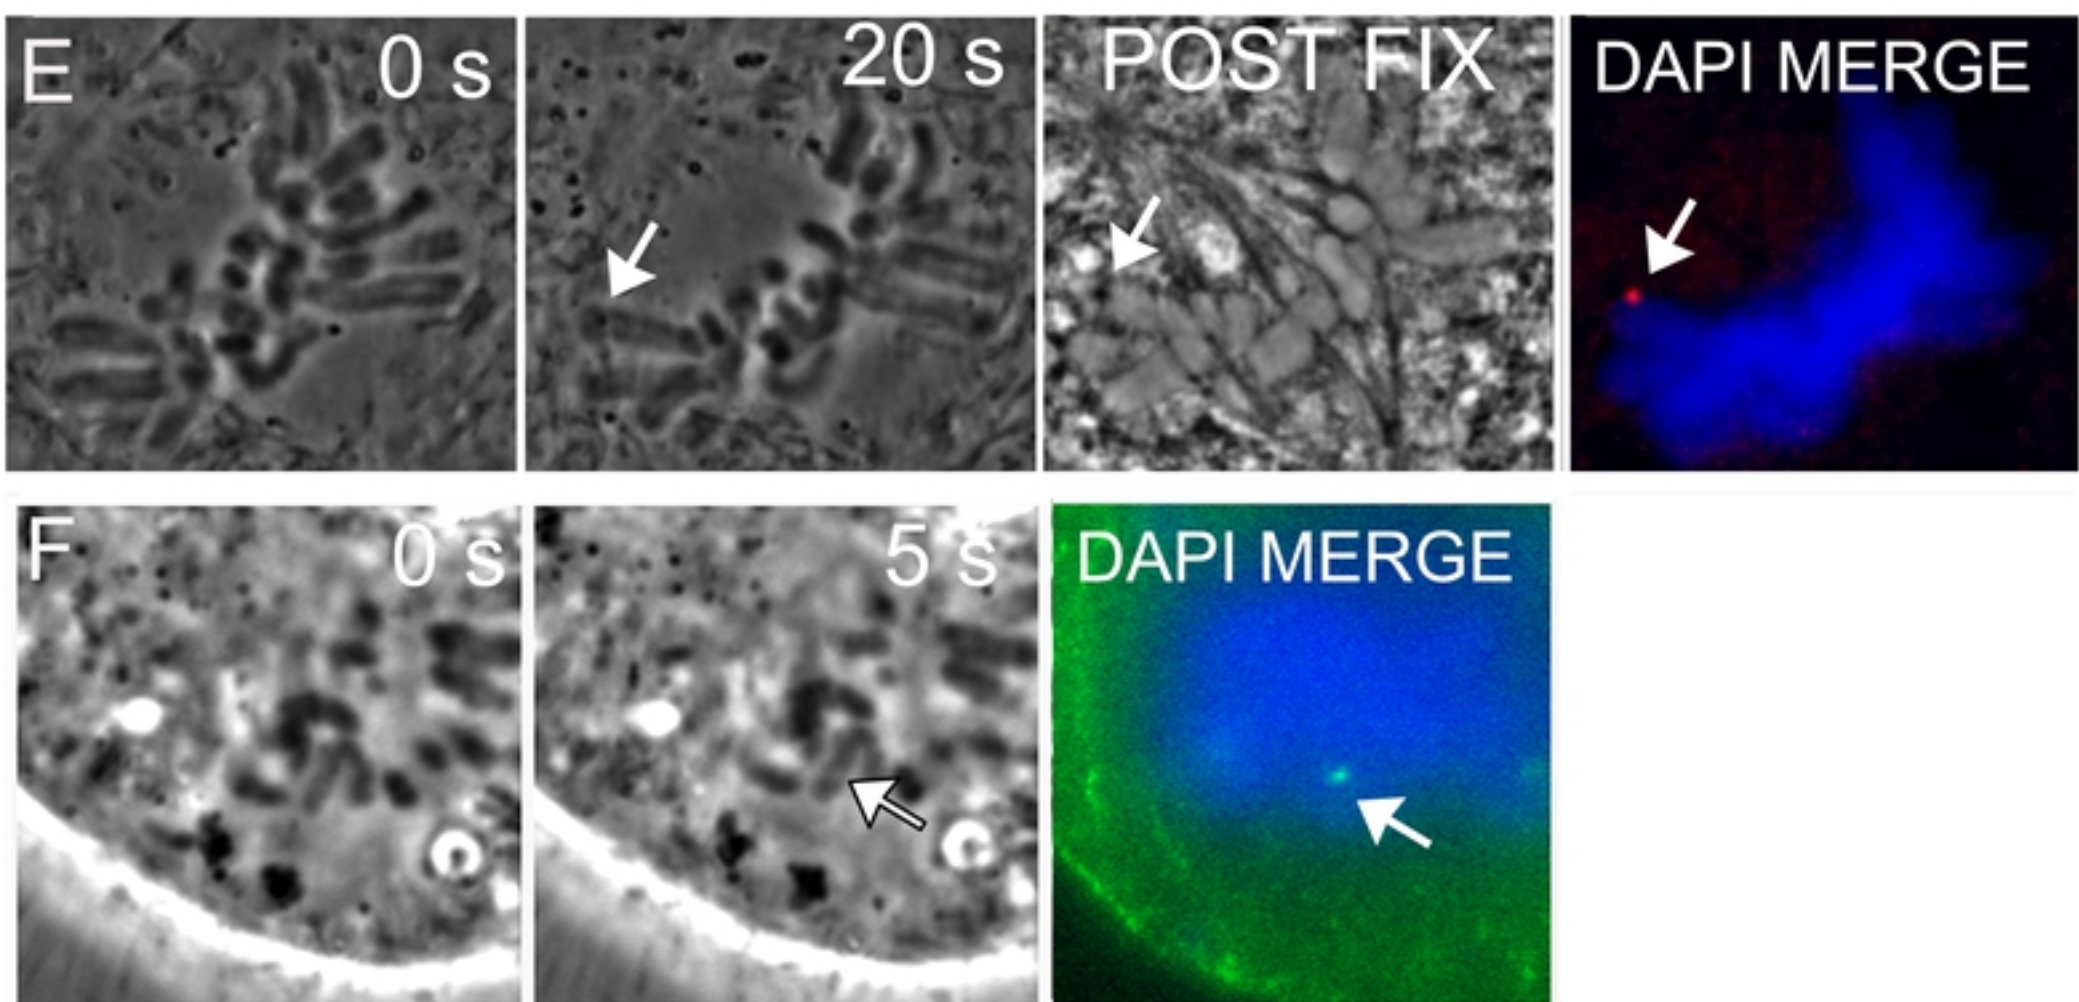

Fig7

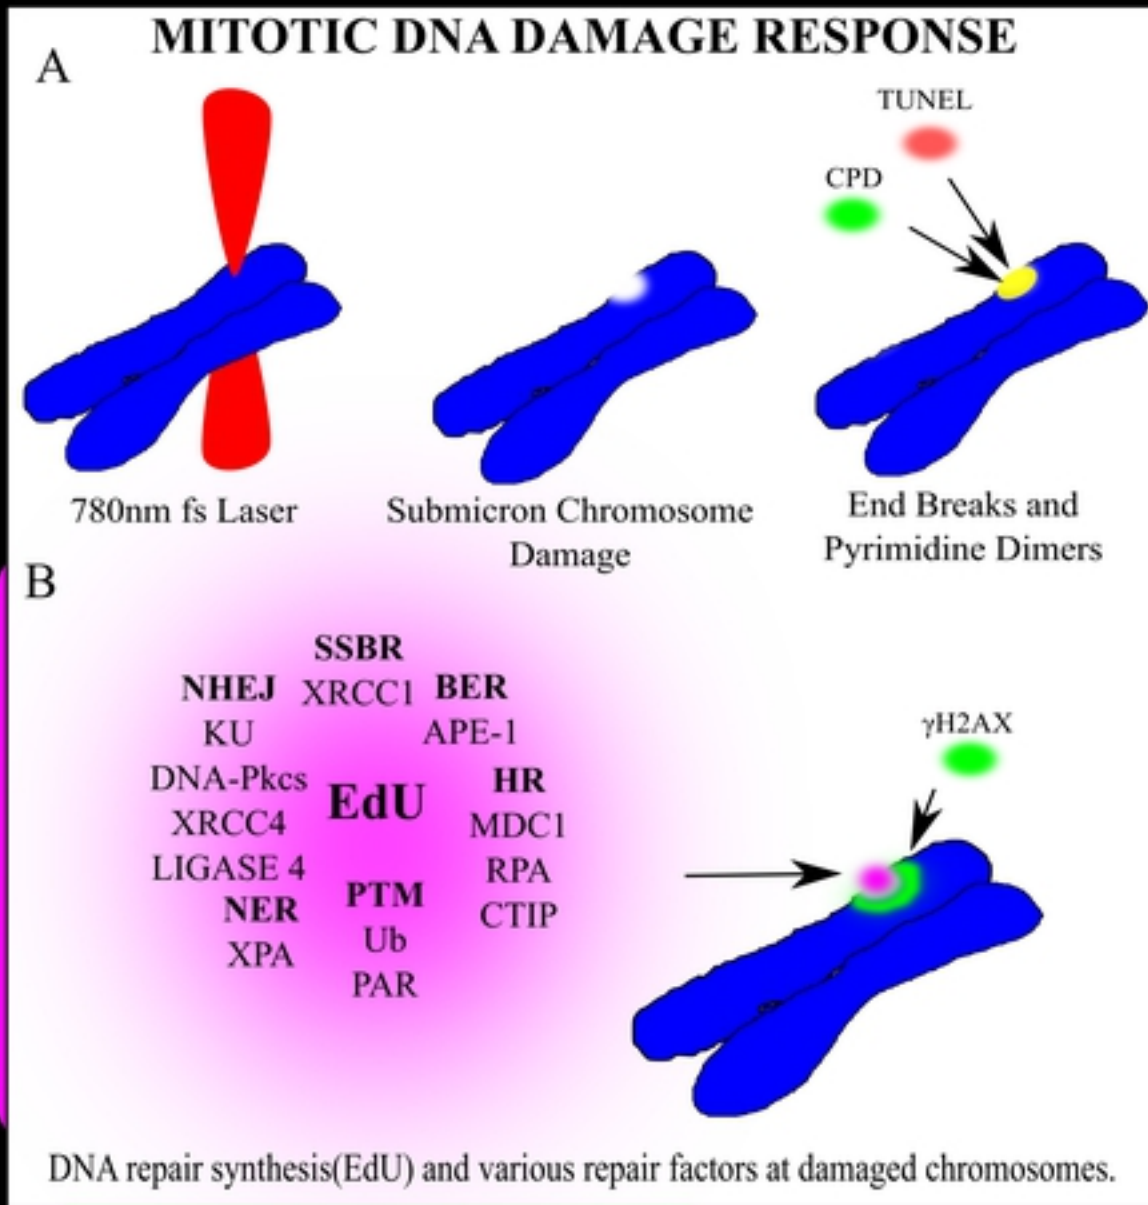

Fig11
